# Supplementary material for: Essential role of CO coverage in CO2 hydrogenation over Pt(111)
Source: Royal Society of Chemistry journal article supplement (doi:10.1039/d3cy01134h), 2023-01-01
Supplement: d3cy01134h1.pdf [file d3cy01134h1.pdf]

## Electronic supplementary information

### Essential role of CO coverage in CO<sub>2</sub> hydrogenation over Pt(111)

Yongjie Xi,<sup>\*,†</sup> Tingting Wang<sup>†,‡</sup>, Jia Wang,<sup>†</sup> Jinlei Li<sup>†</sup> and Fuwei Li<sup>\*,†,‡</sup>

<sup>†</sup>State Key Laboratory for Oxo Synthesis and Selective Oxidation, Lanzhou Institute of Chemical Physics, Chinese Academy of Sciences, Lanzhou 730000, China

<sup>‡</sup>University of Chinese Academy of Sciences, Beijing 100049, China

#### Corrections to the transition state energies of CH<sub>x</sub>-CO coupling

Abild-Pedersen et al. proposed a correction scheme of CO adsorption energies on metal surfaces based on the CO stretch vibrational frequency using RPBE calculations.<sup>1</sup> The energy correction is expressed as  $E_{\text{corr}}=1.8 - 0.0008 \times \nu_{\text{CO}}$ , where  $\nu_{\text{CO}}$  is the vibrational frequency. Our calculations were performed using PBE-D3 and we take the frequency-dependant part of this equation. The adsorption energy of CO on Pt(111) at a 1/4 monolayer (ML) coverage was calculated to be -1.75 eV, which is stronger than the experimental value of -1.37 eV. The average vibrational frequency of CO was calculated to 1762.3 cm<sup>-1</sup>. Then the original correction equation is slightly changed to be  $E_{\text{corr}}=1.79 - 0.0008 \times \nu_{\text{CO}}$ . For the CO adsorption at an minimum state in other cases (e.g. CO adsorption at a 6/16 ML), the vibrational frequency is essentially the same (around 1800 cm<sup>-1</sup>) with those in a 1/4 ML coverage, we therefore take 0.38 eV as the energy correction. For those transition states of CH<sub>x</sub>-CO coupling, the configuration of CO resembles a top configuration in a minimum state (the C-C bond distance is greater than 1.85 Å, much longer than that of 1.53 Å for typical C-C bond length) and vibrational frequency is significantly larger than that of CO adsorption in a 1/4 monolayer coverage. We therefore calculate the energy correction using  $E_{\text{corr}}=1.79 - 0.0008 \times \nu_{\text{CO}}$ . The vibrational frequency and the energy corrections are listed in Table S1. For the CO hydrogenation step, the bond distance of C-H in the TS (TS3 in Fig. 5b) is around 1.3 Å and it can be regarded that there is no separable CO molecule. Hence, we did not apply correction to the energy of TS3. Even if TS3 is stabilized by 0.38 eV as we used for CO adsorption, the energy of it is still 0.1 eV lower than that of TS4 and the reaction kinetics is essentially unchanged.

**Table S1**

| Transition states    | CO vibrational frequency( $\text{cm}^{-1}$ ) | $E_{\text{corr}}$ |
|----------------------|----------------------------------------------|-------------------|
| CH-0CO               | 1924.434                                     | 0.25              |
| CH-2CO               | 1927.227                                     | 0.25              |
| CH-4CO               | 1933.693                                     | 0.24              |
| CH-6CO               | 1944.115                                     | 0.23              |
| CH-8CO               | 1942.326                                     | 0.24              |
| CH <sub>2</sub> -0CO | 1932.498                                     | 0.24              |
| CH <sub>2</sub> -2CO | 1941.240                                     | 0.24              |
| CH <sub>2</sub> -4CO | 1944.060                                     | 0.23              |
| CH <sub>2</sub> -6CO | 1967.499                                     | 0.22              |
| CH <sub>2</sub> -8CO | 1976.035                                     | 0.21              |
| CH <sub>3</sub> -0CO | 1918.305                                     | 0.26              |
| CH <sub>3</sub> -2CO | 1876.692                                     | 0.29              |
| CH <sub>3</sub> -4CO | 1881.605                                     | 0.28              |
| CH <sub>3</sub> -6CO | 1893.628                                     | 0.27              |
| CH <sub>3</sub> -8CO | 1905.286                                     | 0.27              |

## Discussions on the error due to the inaccurate description of CO site preference

An important concern of our study is the  $\text{CH}_x\text{-CO}$  coupling and the energy of CO in the transition state is corrected using the frequency-dependent correction scheme since the CO in the TS resembles that of a top site. Then CO is destabilized by a lesser extent (around 0.15 eV) than that of CO adsorption at a minimum state (see details in Table S1). After that, the energy difference between the TS and the optimized initial state (CO resides at hollow sites and bridge sites) should be well-described. Here, we also assume that the calculated energy of the initial state is correct since the experimental value is used to calibrate the CO adsorption energy at 1/4 ML coverage. In realistic cases, the reactive CO is expected to reside at either the top site or the bridge site. If CO resides at the top site in real case while it is located at hollow site in calculation, then its realistic energy should be 0.08 eV lower than the calculated value. Therefore, the barrier of  $\text{CH}_x\text{-CO}$  coupling is underestimated by 0.08 eV. In the same vein, we can obtain that this error of activation energy is 0.04 eV for a top (real case)-bridge (calculated) or bridge (real case)-hollow (calculated) scenario. This is schematically shown in Fig. S1. By inspection of the values in Fig. 3a, we can obtain the trend that the barriers of  $\text{CH}_x\text{-CO}$  ( $x=1-3$ ) coupling decrease with the increase of CO coverage is unchanged if these errors are accounted for.

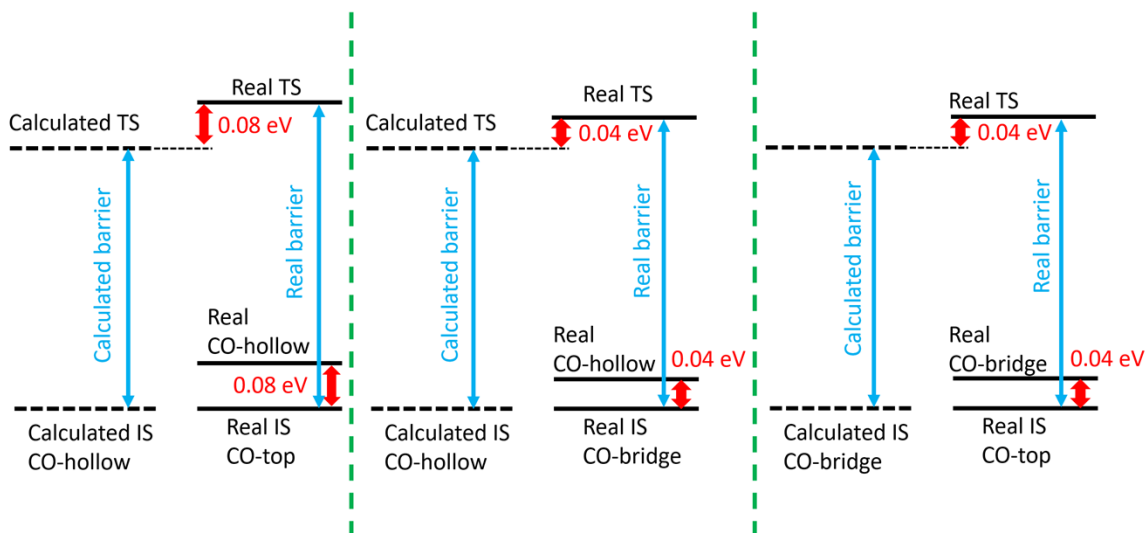

Fig. S1 Schematics of the error introduced by inaccurate description of CO site preference. IS=initial state, TS=transition state.

## Discussions on the choice of reference state for CH-CO coupling

The most concerned case of CH-CO coupling is that for 8CO-CH. This is because Pt(111)-7CO-3H was determined to be the most stable structure from thermodynamic calculation and then used to examine the CO<sub>2</sub> hydrogenation mechanism under reaction conditions. Then one CO is generated first (Fig. 5a), which can desorb or undergoes further hydrogenation steps to form CH (Fig. 5b). The 7CO-CH species can be hydrogenated successively to form CH<sub>4</sub> (Fig. 5c) or accepts another CO from gas phase to undergo CH-CO coupling (Fig. 5d). Therefore, the CO-CH coupling in Fig. 5d is exactly the same with that of 8CO-CH in Fig. 3a. This process corresponds to  $7\text{CO-CH}^*-\text{CO}^* \rightarrow \text{TS} \rightarrow 7\text{CO-CHCO}^*$ . In this case, the initial/transition/final states are all in the same unit cell; the reactive CH\* and CO\* experience the lateral interactions from the same number of CO molecules in the transition state and the initial state, which is a reasonable way to account for the effect of lateral interactions on CH-CO coupling. This also help to directly compare the energetics of CH-CO coupling with CH\* hydrogenation, that is  $7\text{CO-CH}^*-\text{H}^* \rightarrow \text{TS} \rightarrow 7\text{CO-CH}_2^*$ . If CH\* and CO\* are placed in different unit cells, then the coupling process would be  $7\text{CO-CH}^*+7\text{CO-CO}^* \rightarrow \text{TS}+7\text{CO} \rightarrow 7\text{CO-CHCO}^*+7\text{CO}$ . As such, CO\* needs to desorb and then enters another unit cell containing CH\* to allow the CH-CO coupling to occur. Also, in this way, CH\* and CO\* can experience the lateral interactions from different number of CO molecules in the transition state and the initial state. Still, we obtained the same trend that the barrier of CH-CO coupling decreases with the increase of CO coverage, which is provided in Fig. S2. We note that the way of placing CH\* and CO\* in different unit cells as initial state for the 2, 4, 6 and 8 CO cases allow us to draw a direct comparison of them with the 0CO case (CH\* and CO\* in different unit cells). But it does not directly reflect the barrier of the coupling step. By contrast, a merit of placing CH\* and CO\* in the same unit cell is that it is directly associated with the CH-CO coupling step for the 2, 4, 6 and 8 CO cases. Since the major concern of this study is the 8CO-CH case that reflects realistic reaction condition, our analysis is therefore mainly based on the results which place CH\* and CO\* in different unit cells. In summary, the different of choices of the initial state will not affect our conclusion that the barrier of CH-CO coupling will decrease with the increase of CO coverage.

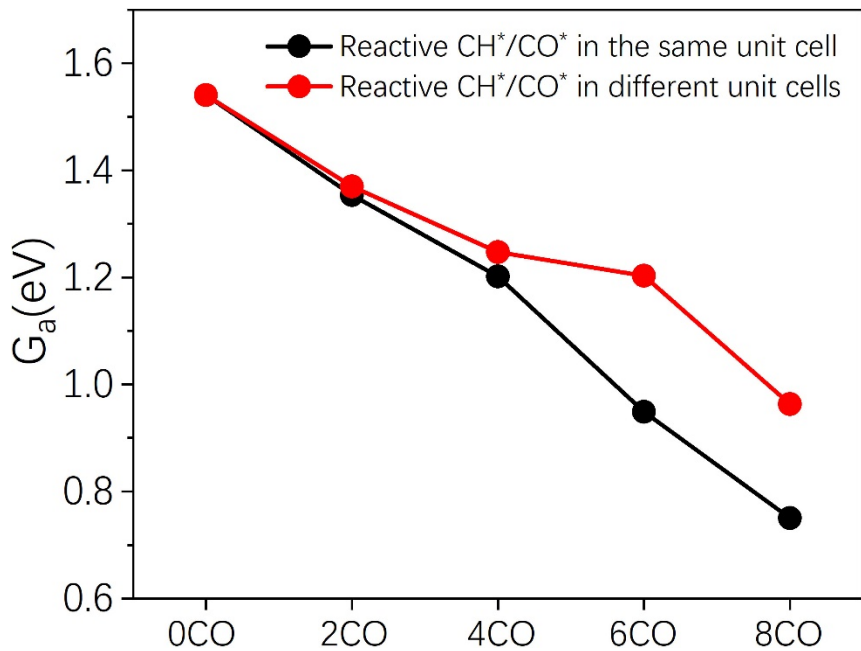

Fig. S2. Comparison of the free energy barriers for CH-CO coupling using different choice of initial states. The CH\* are either placed in the same unit cell or different unit cells for the cases of 2, 4, 6 and 8 CO molecules.

### Details of the microkinetic model

The forward ( $k_f$ ) and backward ( $k_b$ ) rate constants of each elementary reaction step are computed based on harmonic transition state theory. The rate constant of an adsorption step was calculated using an adsorption area per site of  $4.58 \times 10^{-19} \text{ m}^2$ . The desorption rate constant was obtained from the equilibrium constant, adsorption rate constant, and the relationship  $K_{eq} = k_f/k_b$ .

The Gibbs Free energies of each intermediate and transition state were calculated as  $G = E_{DFT} + E_{ZPE} - k_B T \ln q_{vib}$  (1).

Here,  $E_{DFT}$  and  $E_{ZPE} = \frac{1}{2} \sum_i h\nu_i$  are the DFT energy and zero-point energy (ZPE),

respectively.  $q_{vib}$  is the vibrational partition function. To reduce the error of small vibrational frequencies, we shifted all frequencies below  $100 \text{ cm}^{-1}$  to  $100 \text{ cm}^{-1}$ . It is found that when the frequencies below  $50 \text{ cm}^{-1}$  is shifted to  $50 \text{ cm}^{-1}$ , the effective barrier of **TS1** (the rate-determining step of CO formation) is changed from 1.23 eV using the  $100 \text{ cm}^{-1}$  threshold of frequency shift, to 1.22 eV, while that of **TS4** (the rate-determining step of CO consumption) is changed from 1.29 eV to 1.31 eV. Therefore, the reaction energy profile is marginally changed when using different thresholds to shift the low frequencies.

The Gibbs free energies of the gas molecules were calculated using

$$G_{\text{gas}} = E_{\text{DFT}} + E_{\text{ZPE}} + \Delta\mu(T, P^0) + k_B T \ln(P/P^0) \quad (2),$$

where  $\Delta\mu$  was calculated from the rotational, translational, and vibrational partition functions of the gas molecules, while  $P$  and  $P^0$  stands for the pressure/fugacity of the fluid molecule and 1 bar, respectively. The free energies of the gas molecules were used to calculate the free energy of adsorption. The calculated rate constants of all elementary steps are provided in Table S4.

Using the obtained rate constants of each elementary step, we developed a chemical Master equation of probability densities for the system to occupy each discrete state and solved for the steady-state solution. Here, the probability densities are also referred to as surface coverage  $\theta$ . We solved the Master equation using Matlab. The reaction rate (turnover frequency) of each pathway was calculated using the obtained surface coverages. The apparent activation energy ( $E_{app}$ ) was calculated using the expression (2). The temperature ranges for the calculation of  $E_{app}$  are specified in the main text.

$$E_{app} = RT^2 \left( \frac{\partial \ln r}{\partial T} \right)_{P, y_i} \quad (3)$$

where the total pressure ( $P$ ) and the mole fraction of species  $i$  in the reaction mixtures ( $y_i$ ) were

kept constant (i.e., the fluid species fugacities are kept constant).

To identify rate controlling steps in the microkinetic models, we also perform a Campbell's degree of rate control (DRC) <sup>2-3</sup> analysis.

$$\text{DRC}_i = \left( \frac{\partial \ln r}{\partial \ln k_i} \right)_{k_j, k_j \neq k_i} \quad (4).$$

## Effect of the computational errors for gas phase reaction thermodynamics on the equilibrium partial pressures of CO and CH<sub>3</sub>OH

There are still some errors for the calculations of gas phase reaction thermodynamics when the method by Calle-Vallejo et al. was applied (Ref. 41, ACS Catal. 2020, 10, 6900-6907). We mentioned in the Computational method section that the free energy change ( $\Delta G$ , all gas phase species in 1 bar) of the reaction  $\text{CO}_2 + \text{H}_2 \rightarrow \text{CO} + \text{H}_2\text{O}$  at 298K was calculated to be 0.26 eV, while the experimental value is 0.30 eV. Also, the reaction  $\text{CO}_2 + 3\text{H}_2 \rightarrow \text{CH}_3\text{OH} + \text{H}_2\text{O}$  was calculated to be -0.14 eV, while the experimental value is 0.04 eV. The fact that these two reactions are calculated to be more exothermic than the experimental values makes the predicted equilibrium pressures higher than the expected values. If the DFT energy of CO and CH<sub>3</sub>OH are destabilized by 0.04 and 0.18 eV to meet the experimental data, respectively, then the equilibrium pressures of CO and CH<sub>3</sub>OH are 1.33 and 0.05 bar ( $T=473\text{K}$ ,  $P(\text{CO}_2)=10$  bar,  $P(\text{H}_2)=30$  bar). If we neglect the contributions by CH<sub>4</sub> and C<sub>2</sub>H<sub>5</sub>OH, then the conversion of carbonaceous species is 12%. For the reaction  $\text{CO}_2 + 4\text{H}_2 \rightarrow \text{CH}_4 + 2\text{H}_2\text{O}$  and  $2\text{CO}_2 + 6\text{H}_2 \rightarrow \text{C}_2\text{H}_5\text{OH} + 3\text{H}_2\text{O}$ , the experimental  $\Delta G$  at 298K are -1.17 and -0.67 eV, respectively, and the computed values are -1.30 and -0.97 eV. Therefore, the equilibrium conversion of CH<sub>4</sub> and C<sub>2</sub>H<sub>5</sub>OH are much higher than that of CO and CH<sub>3</sub>OH. Also, the choice of partial pressures of CH<sub>4</sub> and C<sub>2</sub>H<sub>5</sub>OH will essentially not affect the reaction rate. Therefore, we keep them to be constant value of 1 bar during microkinetic modelling. We note that if we adjust the energy of CO and CH<sub>3</sub>OH to meet the experimental data (CO is destabilized by 0.04,  $P(\text{CO})=1.33$  bar; CH<sub>3</sub>OH is destabilized by 0.18 eV,  $P(\text{CH}_3\text{OH})=0.05$  bar), then the overall reaction rate is 0.10/s, which is close to the original reaction rate of 0.13/s. Therefore, the ensuing analysis of the reaction kinetics are still based on the unadjusted energies of CO and CH<sub>3</sub>OH.



### Discussions on the formation rate of HCOOH, HCHO and CH<sub>3</sub>CHO

We have added the pathway to the formation of HCOOH in Fig. 5a, whose transition state energy (**TS18**) is 1.27 eV and is significantly higher than that of **TS2** (0.72 eV) for CO formation. Also, the formation of gas phase HCOOH is endergonic by 1.02 eV (P(HCOOH)=1 bar, shown in dashed line in Fig. 5a). The formation rate of HCOOH equals to the consumption rate of it when the partial pressure of it is above 10<sup>-14</sup> bar. When the partial pressure of HCOOH is above 10<sup>-14</sup> bar, all the formed HCOOH will be converted to CO. Therefore, the formation rate of HCOOH is 0 when reaching equilibrium.

Similarly, the formation of gas phase HCHO is endergonic by 0.87 eV (P(HCHO)=1 bar, shown in Fig. 5b). The formation rate of HCHO equals to the consumption rate of it when the partial pressure of it is above 10<sup>-11</sup> bar. When the partial pressure of HCHO is above 10<sup>-11</sup> bar, all the formed HCHO will be converted to CH<sub>3</sub>OH and other products. Therefore, the formation rate of HCHO is 0 when reaching equilibrium.

Regarding CH<sub>3</sub>CHO, the equilibrium partial pressure of it is calculated to be 0.009 bar. When the partial pressure of it above 0.009 bar. The bare surface (Pt(111)-7CO-3H) through the desorption of CH<sub>3</sub>CHO is above **TS16**. Therefore, all the formed CH<sub>3</sub>CHO will be further hydrogenated. The formation rate of gas phase CH<sub>3</sub>CHO is 0 when reaching equilibrium

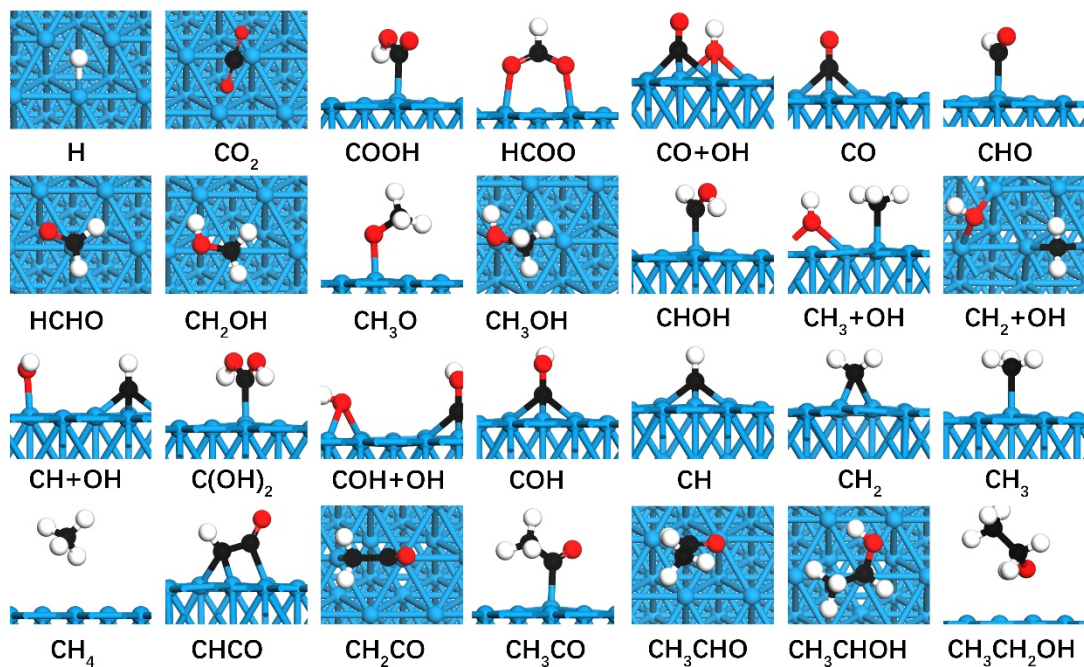

Fig. S3. Configurations of the intermediate states for CO<sub>2</sub> hydrogenation on Pt(111)

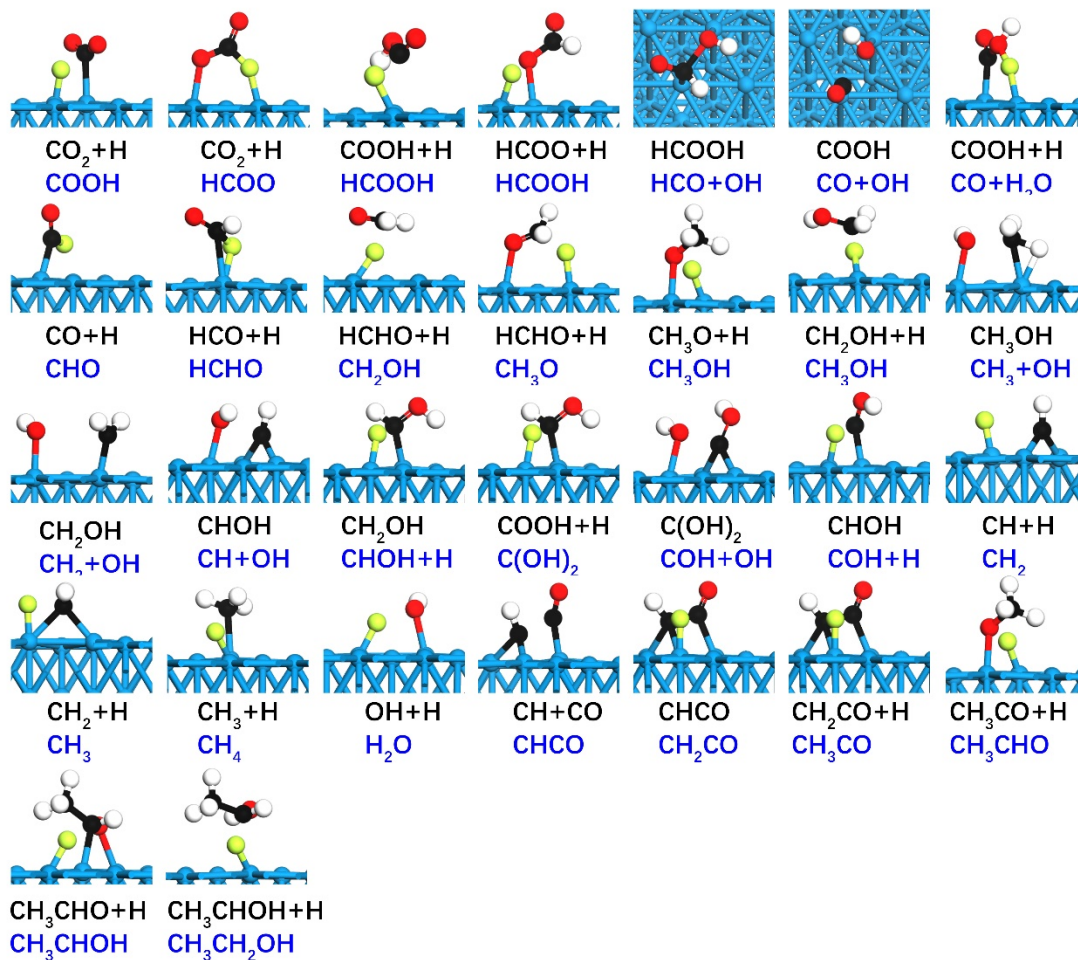

Fig. S4. Configurations of the transition states for CO<sub>2</sub> hydrogenation on Pt(111). The corresponding initial and final states are labelled in black and blue.

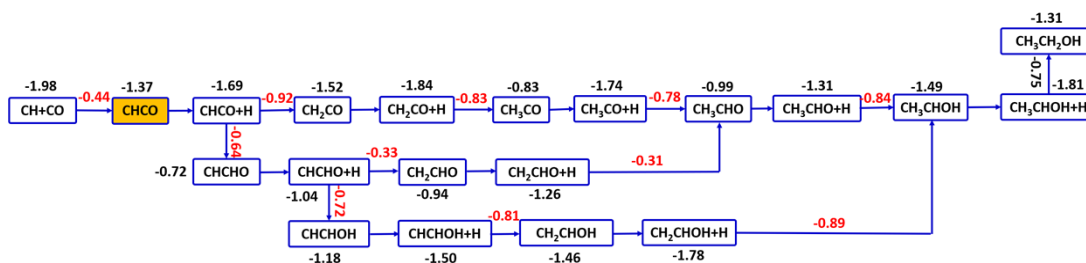

Fig. S5. Additional reaction pathways of CHCO hydrogenation to form ethanol

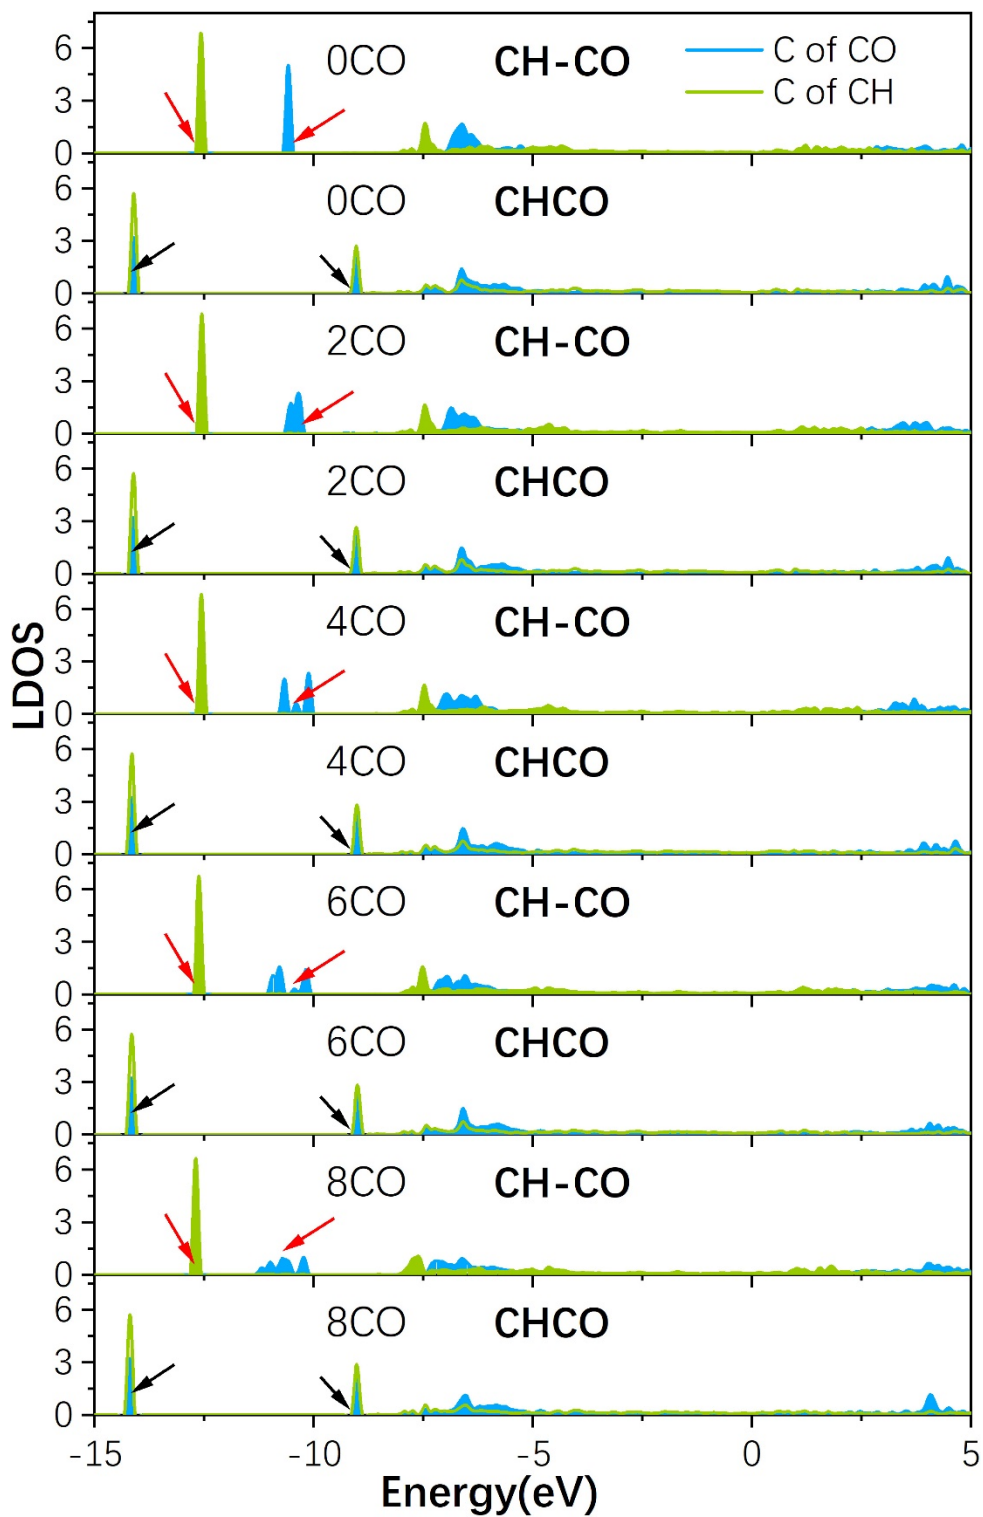

Fig. S6. Density of state for the carbon atoms involved in the C-C coupling before and after coupling.

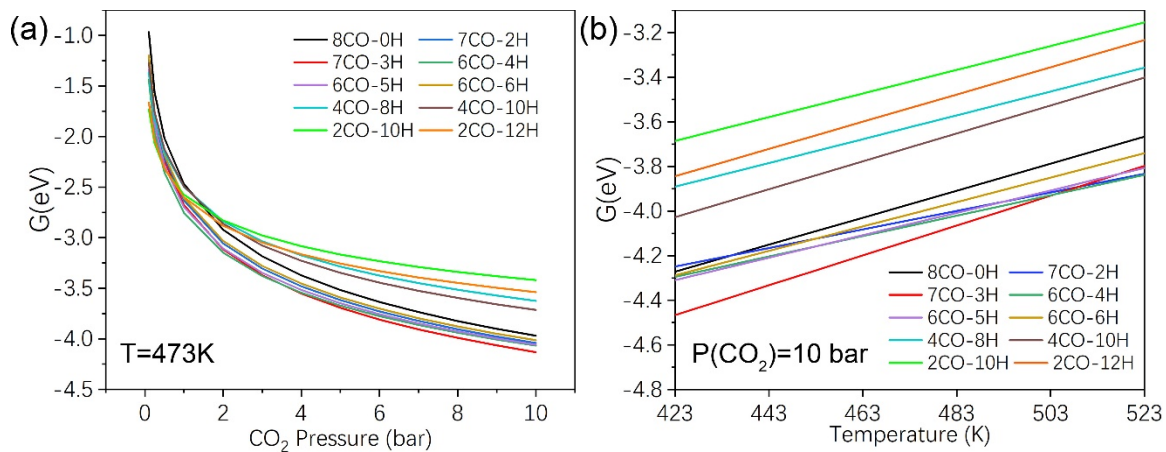

Fig. S7. Adsorption free energies of coadsorbed  $\text{CO}^*$  and  $\text{H}^*$  on Pt(111) at different (a) pressures and (b) temperatures. The  $\text{H}_2/\text{CO}$  ratio is 3. The adsorption free energy of  $\text{CO}^*$  is calculated with the free energy change the reaction  $\text{CO}_2(\text{g})+\text{H}_2(\text{g})\rightarrow\text{CO}^*+\text{H}_2\text{O}(\text{g})$ .



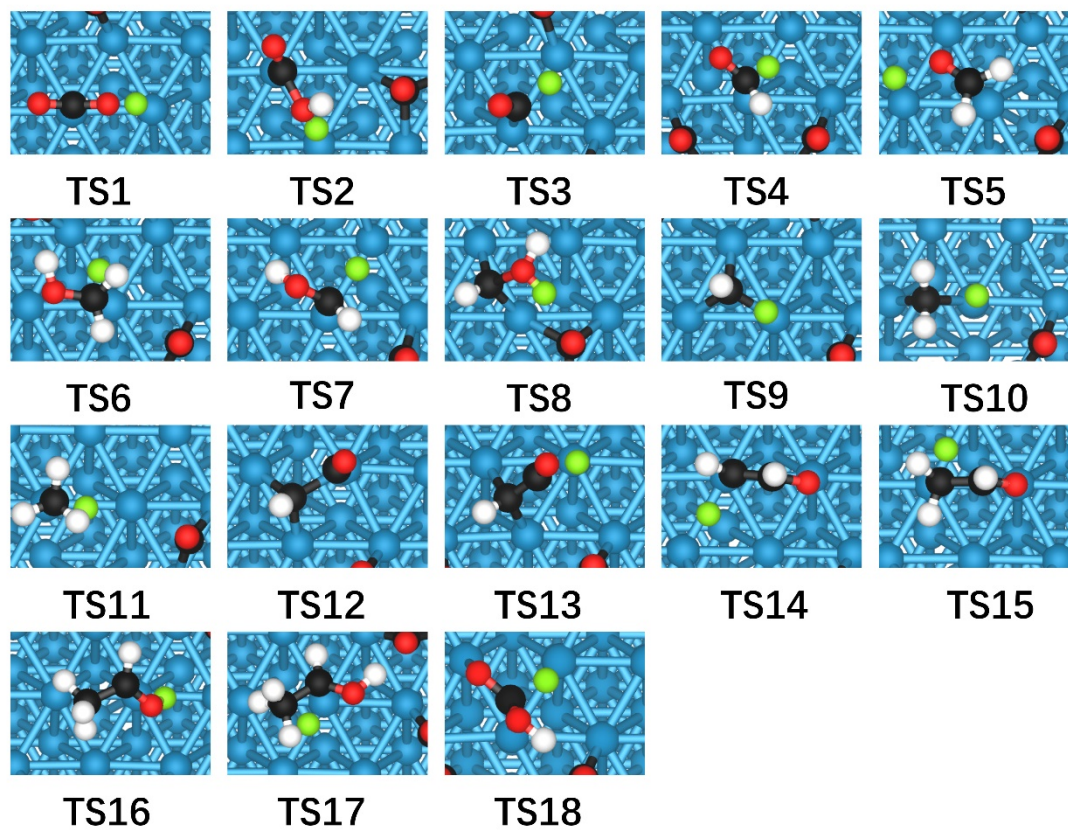

Fig. S8. Configurations of transition states on Pt(111)-7CO-3H.

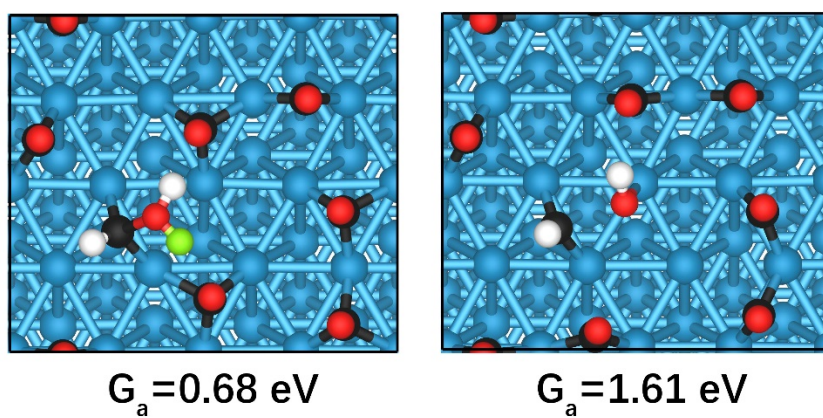

Fig. S9. Transition state configurations of CH-OH bond cleavage on Pt(111)-7CO

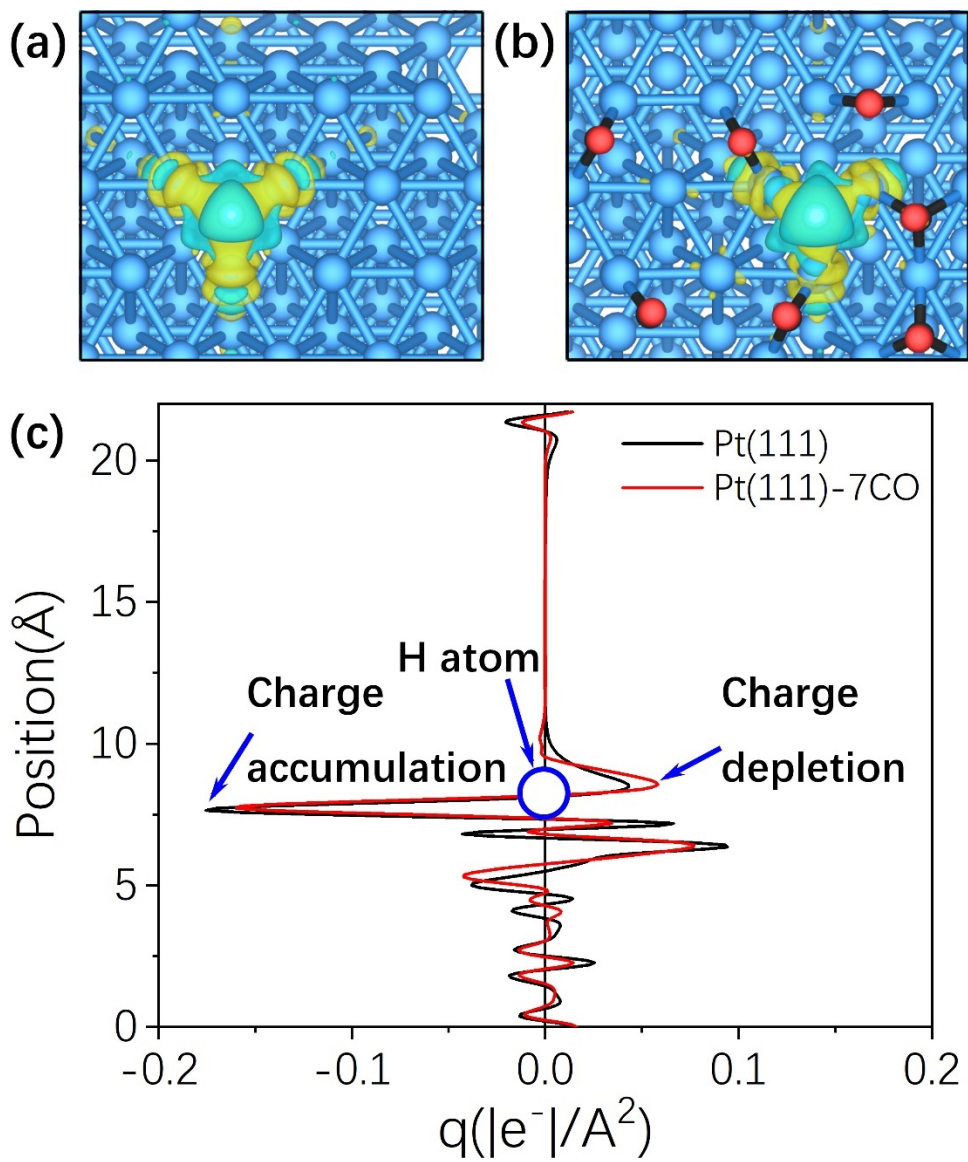

Fig. S10. Differential charge density of H adsorption on (a) Pt(111) and (b) Pt(111)-7CO. The isosurface is set to be  $0.001 |e^-|/\text{\AA}^3$ . Yellow denote charge accumulation and blue denotes charge depletion. (c) Plane-average charge differential charge density of H adsorption. The position of H-atom is marked.

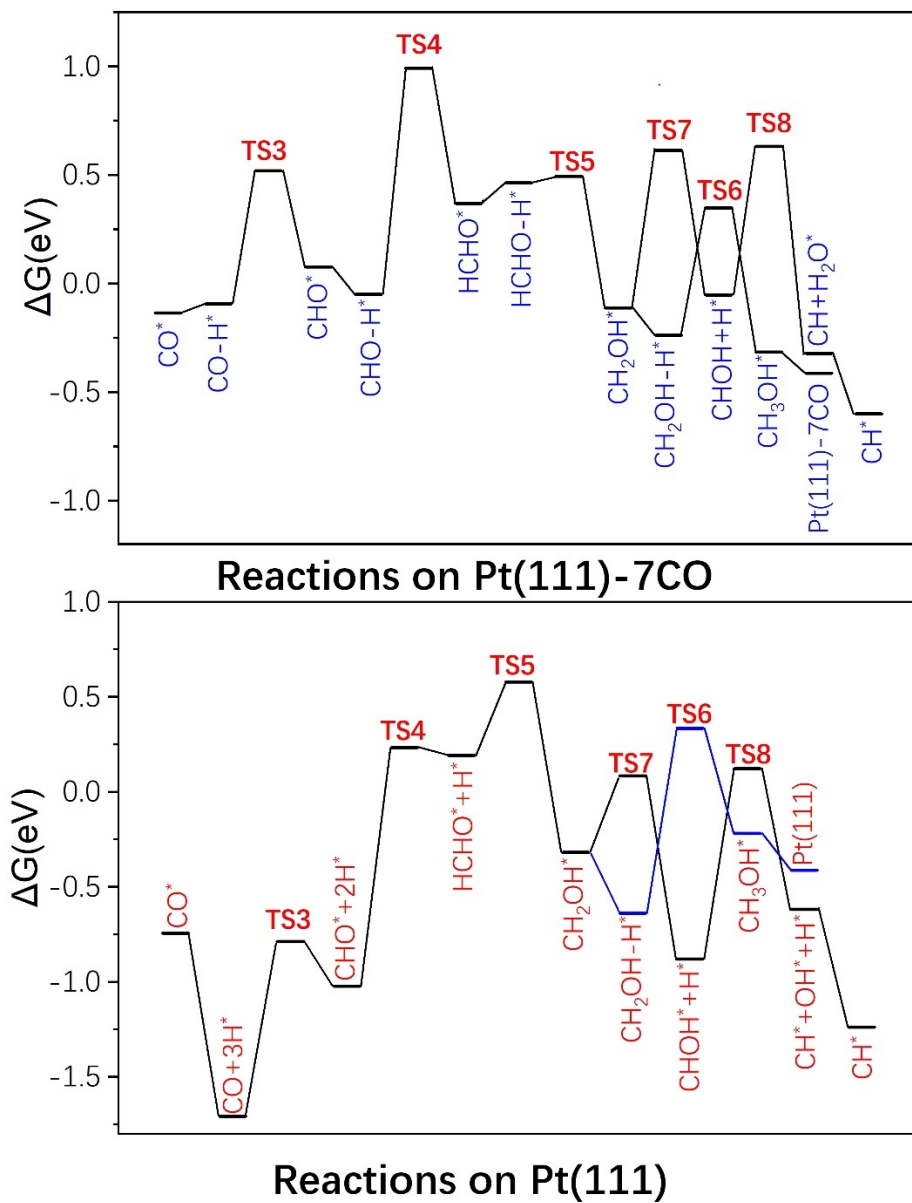

Fig. S11. Comparison of the free energy profiles for CO hydrogenation on Pt(111)-7CO and Pt(111).  $T=473\text{K}$ , the partial pressures of  $\text{CO}_2$  and  $\text{H}_2$  are set to be 10 bar and 30 bar, respectively, and those of all other molecules are set to be 1 bar. The same labeling of transition state is used for Pt(111) with that of Pt(111)-7CO. We added the energy of three  $\text{H}^*$  to correctly describe the effective barrier of CO hydrogenation. Including more H atoms to the system will not change the effective barrier.



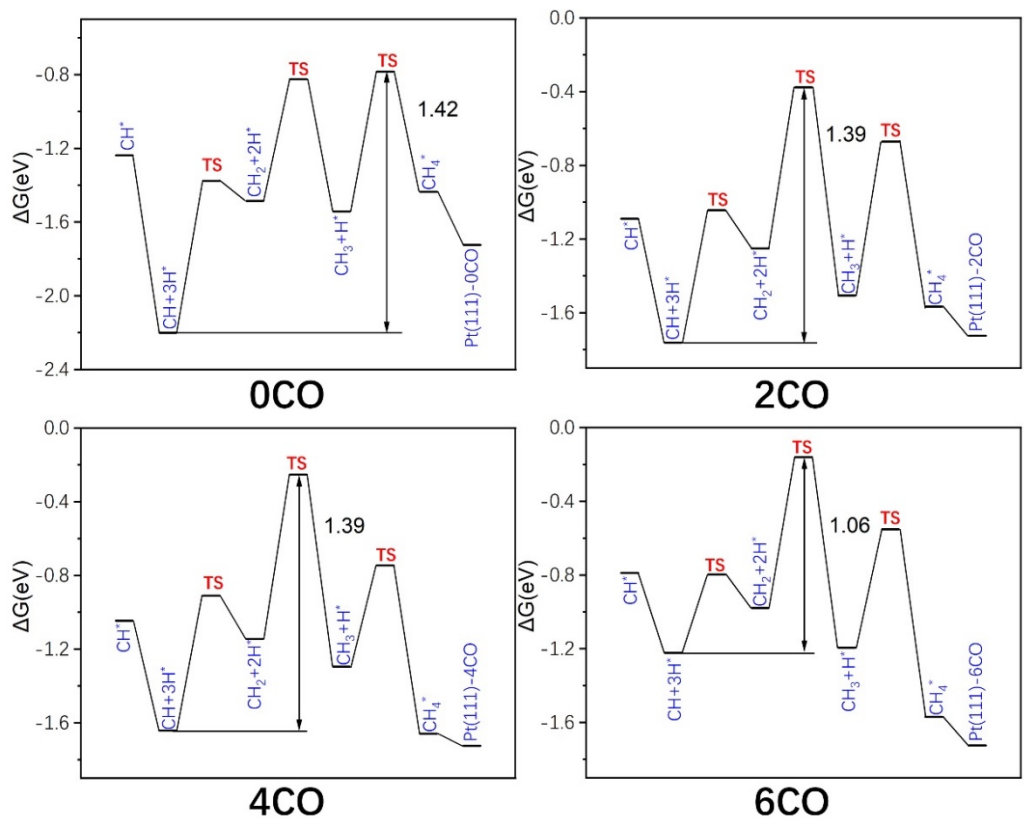

Fig. S12. Free energy profile of  $\text{CH}^*$  hydrogenation on Pt-nCO ( $n=0, 2, 4, 6$ ). The partial pressure of  $\text{H}_2$  is 30 bar.

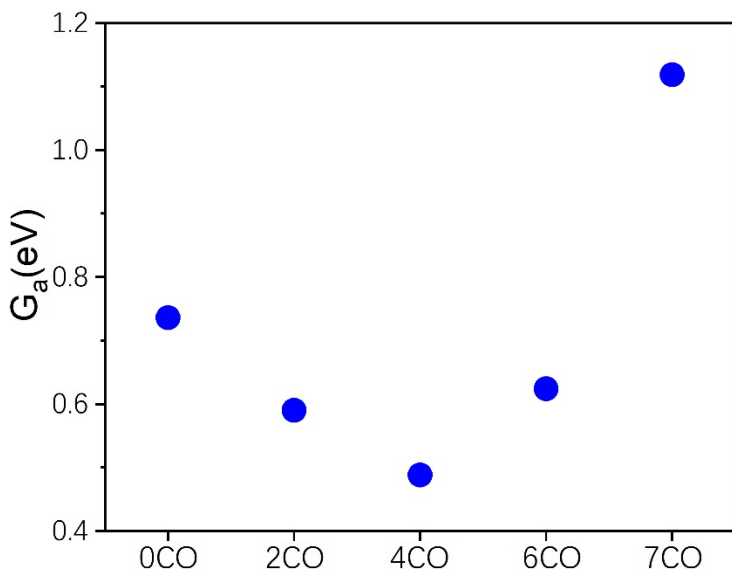

Fig. S13. Change of the free energy barrier ( $G_a$ ) of  $\text{CO}_2$  hydrogenation on Pt(111) at various CO coverage. Note that the initial state in each system is  $\text{H}^* + \text{CO}_2^*$ , therefore the barrier on Pt(111)-7CO is 1.12 eV, which differs with the value of 1.23 eV using Pt(111)-7CO-3H as the reference state.

**Table S2** Intermediate and transition state energies of CO<sub>2</sub> hydrogenation on Pt(111). All the energies are referenced to gas phase CO<sub>2</sub> and H<sub>2</sub>.

| Intermediate state                 |            | Transition state       |                                    |             |
|------------------------------------|------------|------------------------|------------------------------------|-------------|
| Species                            | Energy(eV) | Initial state          | Final state                        | Energy (eV) |
| H                                  | -0.54      | H-CO <sub>2</sub>      | COOH                               | -0.36       |
| CO <sub>2</sub>                    | -0.49      | H-CO <sub>2</sub>      | HCOO                               | 0.09        |
| COOH                               | -1.06      | H-COOH                 | HCOOH                              | -0.48       |
| CO-OH                              | -0.58      | H-HCOO                 | HCOOH                              | 0.02        |
| CO                                 | -1.15      | COOH                   | CO-OH                              | -0.43       |
| HCOO                               | -0.62      | H-COOH                 | CO-H <sub>2</sub> O                | -0.85       |
| H <sub>2</sub> O                   | -0.46      | CO-H                   | COH                                | -0.66       |
| COH                                | -1.56      | CO-H                   | CHO                                | -0.79       |
| C(OH) <sub>2</sub>                 | -1.75      | CHO-H                  | HCHO                               | -0.39       |
| CHO                                | -1.09      | HCHO-H                 | CH <sub>2</sub> OH                 | -0.82       |
| HCHO                               | -0.46      | HCHO-H                 | CH <sub>3</sub> O                  | -1.35       |
| CH <sub>2</sub> OH                 | -1.83      | CH <sub>2</sub> OH-H   | CH <sub>3</sub> OH                 | -1.35       |
| CH <sub>3</sub> O                  | -0.95      | CH <sub>3</sub> O-H    | CH <sub>3</sub> OH                 | -1.26       |
| CH <sub>3</sub> OH                 | -2.04      | CH <sub>3</sub> OH     | CH <sub>3</sub> -OH                | -0.26       |
| COH-OH                             | -0.83      | CH <sub>2</sub> OH     | CH <sub>2</sub> -OH                | -0.36       |
| CHOH                               | -1.44      | CH <sub>2</sub> OH     | CHOH-H                             | -1.27       |
| CH <sub>3</sub> -OH                | -1.56      | CHOH                   | CH-OH                              | -0.36       |
| CH <sub>2</sub> -OH                | -1.02      | COOH-H                 | C(OH) <sub>2</sub>                 | -1.40       |
| CH-OH                              | -1.44      | C(OH) <sub>2</sub>     | COH-OH                             | -2.46       |
| CH                                 | -1.90      | COH-H                  | CHOH                               | 0.19        |
| CH <sub>2</sub>                    | -1.83      | CH-H                   | CH <sub>2</sub>                    | -1.63       |
| CH <sub>3</sub>                    | -2.50      | CH <sub>2</sub> -H     | CH <sub>3</sub>                    | -1.74       |
| CH <sub>4</sub>                    | -2.90      | CH <sub>3</sub> -H     | CH <sub>4</sub>                    | -2.25       |
| CHCO                               | -2.50      | CH-CO                  | CHCO                               | -1.74       |
| CH <sub>2</sub> CO                 | -2.99      | CHCO-H                 | CH <sub>2</sub> CO                 | -2.29       |
| CH <sub>3</sub> CO                 | -3.53      | CH <sub>2</sub> CO-H   | CH <sub>3</sub> CO                 | -2.56       |
| CH <sub>3</sub> CHO                | -3.05      | CH <sub>3</sub> CO-H   | CH <sub>3</sub> CHO                | -2.78       |
| CH <sub>3</sub> CHOH               | -4.05      | CH <sub>3</sub> CHO-H  | CH <sub>3</sub> CHOH               | -3.29       |
| CH <sub>3</sub> CH <sub>2</sub> OH | -4.20      | CH <sub>3</sub> CHOH-H | CH <sub>3</sub> CH <sub>2</sub> OH | -3.47       |

**Table S3** Intermediate and transition state energies of CO<sub>2</sub> hydrogenation on Pt(111)-7CO-3H. All the energies are referenced to gas phase CO<sub>2</sub> and H<sub>2</sub>.

| Intermediate state     |            | Transition state       |                                    |             |
|------------------------|------------|------------------------|------------------------------------|-------------|
| Species                | Energy(eV) | Initial state          | Final state                        | Energy (eV) |
| 7CO-H                  | -0.38      | H-CO <sub>2</sub>      | COOH                               | 0.14        |
| 7CO-3H                 | -1.02      | H-COOH                 | CO-H <sub>2</sub> O                | -0.49       |
| CO <sub>2</sub> -H     | -0.84      | CO-H                   | CHO                                | -0.13       |
| COOH                   | -0.59      | CHO-H                  | HCHO                               | 0.04        |
| COOH+H                 | -0.87      | HCHO-H                 | CH <sub>2</sub> OH                 | -0.64       |
| CO-H <sub>2</sub> O    | -1.53      | CH <sub>2</sub> OH     | CHOH-H                             | -0.75       |
| CO                     | -1.01      | CH <sub>2</sub> OH-H   | CH <sub>3</sub> OH                 | -1.42       |
| CO-H                   | -1.43      | CHOH-H                 | CH-H <sub>2</sub> O                | -0.88       |
| CHO                    | -0.70      | CH-H                   | CH <sub>2</sub>                    | -0.85       |
| HCHO                   | -0.70      | CH <sub>2</sub> -H     | CH <sub>3</sub>                    | -1.39       |
| HCHO-H                 | -0.78      | CH <sub>3</sub> -H     | CH <sub>4</sub>                    | -2.19       |
| CH <sub>2</sub> OH     | -1.69      | CH-CO                  | CHCO                               | -1.06       |
| CHOH-H                 | -1.49      | CHCO-H                 | CHCHO                              | -1.43       |
| CH-H <sub>2</sub> O    | -1.72      | CHCHO-H                | CH <sub>2</sub> CHO                | -1.73       |
| CH <sub>2</sub> OH+H   | -2.06      | CH <sub>2</sub> CHO-H  | CH <sub>3</sub> CHO                | -2.40       |
| CH <sub>3</sub> OH     | -2.20      | CH <sub>3</sub> CHO-H  | CH <sub>3</sub> CHOH               | -2.87       |
| CH                     | -1.26      | CH <sub>3</sub> CHOH-H | CH <sub>3</sub> CH <sub>2</sub> OH | -4.00       |
| CH-H                   | -1.60      |                        |                                    |             |
| CH <sub>2</sub>        | -1.47      |                        |                                    |             |
| CH <sub>2</sub> -H     | -1.80      |                        |                                    |             |
| CH <sub>3</sub>        | -2.37      |                        |                                    |             |
| CH <sub>3</sub> -H     | -2.65      |                        |                                    |             |
| CH <sub>4</sub>        | -2.89      |                        |                                    |             |
| CH-CO                  | -2.03      |                        |                                    |             |
| CHCO                   | -1.88      |                        |                                    |             |
| CHCO-H                 | -2.09      |                        |                                    |             |
| CHCHO                  | -2.00      |                        |                                    |             |
| CHCHO-H                | -2.14      |                        |                                    |             |
| CH <sub>2</sub> CHO    | -2.81      |                        |                                    |             |
| CH <sub>2</sub> CHO-H  | -2.85      |                        |                                    |             |
| CH <sub>3</sub> CHO    | -3.34      |                        |                                    |             |
| CH <sub>3</sub> CHO-H  | -3.53      |                        |                                    |             |
| CH <sub>3</sub> CHOH   | -4.00      |                        |                                    |             |
| CH <sub>3</sub> CHOH-H | -4.21      |                        |                                    |             |

**Table S4.** Forward ( $k_f$ ) and backward ( $k_b$ ) reaction rate constant, free energy of activation ( $\Delta G^\ddagger$ ) and reaction free energy ( $\Delta G_{\text{rxn}}$ ) of each elementary step the  $\text{CO}_2$  hydrogenation on Pt(111)-7CO-3H. T=473K; P( $\text{CO}_2$ )=10 bar, P( $\text{H}_2$ )=30 bar; P( $\text{CO}$ )=4.43 bar; P( $\text{CH}_3\text{OH}$ )=4.88 bar, the partial pressures of all other molecules are set to be 1 bar.

| Reaction label | Elementary Steps                                                | $k_f(\text{s}^{-1})$ | $k_b(\text{s}^{-1})$ | $\Delta G^\ddagger(\text{eV})$ | $\Delta G_{\text{rxn}}(\text{eV})$ |
|----------------|-----------------------------------------------------------------|----------------------|----------------------|--------------------------------|------------------------------------|
| R1             | <b>Pt(111)-7CO</b> +0.5H <sub>2</sub> (g)→H                     | 1.177E+11            | 1.072E+09            |                                | -0.191                             |
| R2             | H+CO <sub>2</sub> (g)→H-CO <sub>2</sub>                         | 8.364E+09            | 1.580E+13            |                                | 0.307                              |
| R3             | H-CO <sub>2</sub> →COOH                                         | 2.264E+04            | 5.986E+07            | 0.811                          | 0.321                              |
| R4             | COOH+0.5H <sub>2</sub> (g)→COOH-H                               | 1.177E+11            | 2.880E+10            |                                | -0.057                             |
| R5             | COOH-H→CO-H <sub>2</sub> O                                      | 2.193E+09            | 5.293E+05            | 0.343                          | -0.340                             |
| R6             | CO-H <sub>2</sub> O→CO+H <sub>2</sub> O(g)                      | 3.034E+10            | 1.308E+09            |                                | -0.128                             |
| R7             | CO→CO(g)+ <b>Pt(111)-7CO</b>                                    | 6.481E+08            | 4.928E+09            |                                | 0.083                              |
| R8             | CO+0.5H <sub>2</sub> (g)→CO-H                                   | 1.177E+11            | 3.280E+11            |                                | 0.042                              |
| R9             | CO-H→CHO                                                        | 9.441E+06            | 1.916E+08            | 0.565                          | 0.123                              |
| R10            | CHO+0.5H <sub>2</sub> (g)→CHO-H                                 | 1.177E+11            | 5.294E+09            |                                | -0.126                             |
| R11            | CHO-H→HCHO                                                      | 4.639E+01            | 1.361E+06            | 1.063                          | 0.419                              |
| R12            | HCHO+0.5H <sub>2</sub> (g)→HCHO-H                               | 1.177E+11            | 1.177E+12            |                                | 0.094                              |
| R13            | HCHO-H→CH <sub>2</sub> OH                                       | 4.721E+12            | 3.464E+06            | 0.030                          | -0.576                             |
| R14            | CH <sub>2</sub> OH+0.5H <sub>2</sub> (g)→CH <sub>2</sub> OH-H   | 1.177E+11            | 5.293E+09            |                                | -0.126                             |
| R15            | CH <sub>2</sub> OH-H→CH <sub>3</sub> OH                         | 5.542E+06            | 8.356E+05            | 0.587                          | -0.077                             |
| R16            | CH <sub>3</sub> OH→ <b>Pt(111)-7CO</b> +CH <sub>3</sub> OH(g)   | 1.816E+10            | 7.846E+09            |                                | -0.034                             |
| R17            | CH <sub>2</sub> OH→CHOH-H                                       | 1.208E+05            | 5.228E+05            | 0.743                          | 0.060                              |
| R18            | CHOH-H→CH-H <sub>2</sub> O                                      | 1.893E+05            | 2.568E+02            | 0.724                          | -0.269                             |
| R19            | CH-H <sub>2</sub> O→CH+H <sub>2</sub> O(g)                      | 1.219E+12            | 1.308E+09            |                                | -0.279                             |
| R20            | CH+0.5H <sub>2</sub> (g)→CH-H                                   | 1.177E+11            | 1.614E+10            |                                | -0.081                             |
| R21            | CH-H→CH <sub>2</sub>                                            | 2.373E+05            | 8.217E+07            | 0.715                          | 0.238                              |
| R22            | CH <sub>2</sub> +0.5H <sub>2</sub> (g)→CH <sub>2</sub> -H       | 1.177E+11            | 2.154E+10            |                                | -0.069                             |
| R23            | CH <sub>2</sub> -H→CH <sub>3</sub>                              | 5.251E+08            | 2.536E+03            | 0.401                          | -0.499                             |
| R24            | CH <sub>3</sub> +0.5H <sub>2</sub> (g)→CH <sub>3</sub> -H       | 1.177E+11            | 2.026E+10            |                                | -0.072                             |
| R25            | CH <sub>3</sub> -H→CH <sub>4</sub>                              | 2.101E+08            | 1.064E+05            | 0.438                          | -0.309                             |
| R26            | CH <sub>4</sub> →CH <sub>4</sub> (g)+ <b>Pt(111)-7CO</b>        | 4.764E+12            | 1.387E+09            |                                | -0.332                             |
| R27            | CH+CO(g)→CH-CO                                                  | 4.928E+09            | 9.910E+10            |                                | 0.122                              |
| R28            | CH-CO→CHCO                                                      | 1.000E+05            | 9.746E+01            | 0.750                          | -0.283                             |
| R29            | CHCO+0.5H <sub>2</sub> (g)→CHCO-H                               | 1.177E+11            | 3.471E+11            |                                | 0.044                              |
| R30            | CHCO-H→CHCHO                                                    | 2.307E+06            | 9.814E+08            | 0.622                          | 0.247                              |
| R31            | CHCHO+0.5H <sub>2</sub> (g)→CHCHO-H                             | 1.177E+11            | 1.525E+12            |                                | 0.104                              |
| R32            | CHCHO-H→CH <sub>2</sub> CHO                                     | 5.641E+08            | 3.320E+02            | 0.398                          | -0.585                             |
| R33            | CH <sub>2</sub> CHO+0.5H <sub>2</sub> (g)→CH <sub>2</sub> CHO-H | 1.177E+11            | 2.060E+13            |                                | 0.211                              |
| R34            | CH <sub>2</sub> CHO-H→CH <sub>3</sub> CHO                       | 5.843E+08            | 4.613E+03            | 0.397                          | -0.479                             |

|     |                                                                                                                         |           |           |       |        |
|-----|-------------------------------------------------------------------------------------------------------------------------|-----------|-----------|-------|--------|
| R35 | $\text{CH}_3\text{CHO}+0.5\text{H}_2(\text{g})\rightarrow\text{CH}_3\text{CHO-H}$                                       | 1.177E+11 | 3.566E+11 |       | 0.045  |
| R36 | $\text{CH}_3\text{CHO-H}\rightarrow\text{CH}_3\text{CHOH}$                                                              | 1.042E+06 | 4.734E+03 | 0.655 | -0.220 |
| R37 | $\text{CH}_3\text{CHOH}+0.5\text{H}_2(\text{g})\rightarrow\text{CH}_3\text{CHOH-H}$                                     | 1.177E+11 | 1.254E+11 |       | 0.003  |
| R38 | $\text{CH}_3\text{CHOH-H}\rightarrow\text{CH}_3\text{CH}_2\text{OH}$                                                    | 1.190E+11 | 1.462E+10 | 0.180 | -0.085 |
| R39 | $\text{CH}_3\text{CH}_2\text{OH}\rightarrow\text{CH}_3\text{CH}_2\text{OH}(\text{g})+\text{Pt}(\mathbf{11})\text{-7CO}$ | 9.515E+08 | 8.180E+08 |       | -0.006 |
| R40 | $\text{H}+0.5\text{H}_2(\text{g})\rightarrow 3\text{H}$                                                                 | 1.177E+11 | 8.407E+09 |       | -0.108 |

**Table S5.** Coverage of surface species for the reactions on Pt(111)-7CO-3H, the rate constants presented in Table S4 are used. For brevity, the “7CO” notation is omitted to describe each surface species.

| Surface species      | Coverage   |
|----------------------|------------|
| 1H                   | 6.5144E-02 |
| H-CO <sub>2</sub>    | 3.4478E-05 |
| COOH                 | 1.0845E-08 |
| COOH-H               | 4.4318E-08 |
| CO-H <sub>2</sub> O  | 6.0342E-04 |
| CO                   | 1.4001E-02 |
| CO-H                 | 5.0237E-03 |
| CHO                  | 7.5237E-05 |
| CHO-H                | 1.6726E-03 |
| HCHO                 | 1.4751E-11 |
| HCHO-H               | 1.3633E-12 |
| CH <sub>2</sub> OH   | 1.8200E-06 |
| CH <sub>2</sub> OH-H | 4.0468E-05 |
| CH <sub>3</sub> OH   | 2.6838E-04 |
| CHOH-H               | 2.5587E-07 |
| CH-H <sub>2</sub> O  | 8.2682E-11 |
| CH                   | 7.6979E-08 |
| CH-H                 | 5.6134E-07 |
| CH <sub>2</sub>      | 4.6217E-11 |
| CH <sub>2</sub> -H   | 2.4648E-10 |
| CH <sub>3</sub>      | 1.2222E-10 |
| CH <sub>3</sub> -H   | 7.0371E-10 |
| CH <sub>4</sub>      | 1.7283E-07 |
| CH-CO                | 1.2597E-08 |
| CHCO                 | 3.7593E-08 |
| CHCO-H               | 1.2747E-08 |

|                                    |            |
|------------------------------------|------------|
| CHCHO                              | 2.8692E-11 |
| CHCHO-H                            | 2.2128E-12 |
| CH <sub>2</sub> CHO                | 1.6513E-09 |
| CH <sub>2</sub> CHO-H              | 9.4317E-12 |
| CH <sub>3</sub> CHO                | 9.2406E-07 |
| CH <sub>3</sub> CHO-H              | 3.0493E-07 |
| CH <sub>3</sub> CHOH               | 6.6824E-05 |
| CH <sub>3</sub> CHOH-H             | 6.2708E-05 |
| CH <sub>3</sub> CH <sub>2</sub> OH | 5.1035E-04 |
| Pt(111)-7CO                        | 5.9367E-04 |
| 3H                                 | 9.1190E-01 |

#### Reference

1. Abild-Pedersen, F.; Andersson, M. P., CO adsorption energies on metals with correction for high coordination adsorption sites – A density functional study. *Surf. Sci.* **2007**, *601* (7), 1747-1753.
2. Stegelmann, C.; Andreasen, A.; Campbell, C. T., Degree of Rate Control: How Much the Energies of Intermediates and Transition States Control Rates. *Journal of the American Chemical Society* **2009**, *131* (23), 8077-8082.
3. Campbell, C. T., The Degree of Rate Control: A Powerful Tool for Catalysis Research. *ACS Catal.* **2017**, *7* (4), 2770-2779.

**Pt(111)-7CO-3H**

1.0

|               |              |               |
|---------------|--------------|---------------|
| 11.1216001511 | 0.0000000000 | 0.0000000000  |
| 0.0000000000  | 9.6316003799 | 0.0000000000  |
| 0.0000000000  | 0.0000000000 | 21.7964000702 |

|   |   |   |    |
|---|---|---|----|
| C | H | O | Pt |
| 7 | 3 | 7 | 64 |

Direct

|             |             |             |
|-------------|-------------|-------------|
| 0.878740013 | 0.068470001 | 0.378820002 |
| 0.875039995 | 0.409110010 | 0.383120000 |
| 0.754480004 | 0.740830004 | 0.383459985 |
| 0.199800000 | 0.137070000 | 0.385129988 |
| 0.552839994 | 0.128790006 | 0.386339992 |
| 0.457269996 | 0.646279991 | 0.387710005 |
| 0.081380002 | 0.630230010 | 0.388509989 |
| 0.372810006 | 0.915520012 | 0.360390007 |
| 0.364769995 | 0.402669996 | 0.354110003 |
| 0.626030028 | 0.413069993 | 0.359409988 |
| 0.876070023 | 0.059889998 | 0.433270007 |
| 0.866230011 | 0.409539998 | 0.437480003 |
| 0.756349981 | 0.739180028 | 0.437550008 |
| 0.207069993 | 0.145720005 | 0.439000010 |
| 0.546389997 | 0.134460002 | 0.440270007 |
| 0.465189993 | 0.650529981 | 0.441630006 |
| 0.088909999 | 0.630879998 | 0.442369998 |
| 0.000000000 | 0.000000000 | 0.000000000 |
| 0.000000000 | 0.500000000 | 0.000000000 |
| 0.125000000 | 0.250000000 | 0.000000000 |
| 0.125000000 | 0.750000000 | 0.000000000 |
| 0.250000000 | 0.000000000 | 0.000000000 |
| 0.250000000 | 0.500000000 | 0.000000000 |
| 0.375000000 | 0.250000000 | 0.000000000 |
| 0.375000000 | 0.750000000 | 0.000000000 |
| 0.500000000 | 0.000000000 | 0.000000000 |
| 0.500000000 | 0.500000000 | 0.000000000 |
| 0.625000000 | 0.250000000 | 0.000000000 |
| 0.625000000 | 0.750000000 | 0.000000000 |
| 0.750000000 | 0.000000000 | 0.000000000 |
| 0.750000000 | 0.500000000 | 0.000000000 |
| 0.875000000 | 0.250000000 | 0.000000000 |

|             |             |             |
|-------------|-------------|-------------|
| 0.875000000 | 0.750000000 | 0.000000000 |
| 0.000000000 | 0.166669995 | 0.103940003 |
| 0.000000000 | 0.666670024 | 0.103940003 |
| 0.125000000 | 0.416669995 | 0.103940003 |
| 0.125000000 | 0.916670024 | 0.103940003 |
| 0.250000000 | 0.166669995 | 0.103940003 |
| 0.250000000 | 0.666670024 | 0.103940003 |
| 0.375000000 | 0.416669995 | 0.103940003 |
| 0.375000000 | 0.916670024 | 0.103940003 |
| 0.500000000 | 0.166669995 | 0.103940003 |
| 0.500000000 | 0.666670024 | 0.103940003 |
| 0.625000000 | 0.416669995 | 0.103940003 |
| 0.625000000 | 0.916670024 | 0.103940003 |
| 0.750000000 | 0.166669995 | 0.103940003 |
| 0.750000000 | 0.666670024 | 0.103940003 |
| 0.875000000 | 0.416669995 | 0.103940003 |
| 0.875000000 | 0.916670024 | 0.103940003 |
| 0.249320000 | 0.330769986 | 0.205329999 |
| 0.750180006 | 0.833029985 | 0.206100002 |
| 0.877030015 | 0.085400000 | 0.206809998 |
| 0.377739996 | 0.584999979 | 0.207359999 |
| 0.375180006 | 0.080210000 | 0.207379997 |
| 0.125650004 | 0.078620002 | 0.207440004 |
| 0.123590000 | 0.580500007 | 0.207310006 |
| 0.624819994 | 0.083769999 | 0.207849994 |
| 0.502070010 | 0.336450011 | 0.207920000 |
| 0.875299990 | 0.578960001 | 0.208370000 |
| 0.999830008 | 0.829490006 | 0.208389997 |
| 0.750129998 | 0.330570012 | 0.209189996 |
| 0.501839995 | 0.833850026 | 0.210199997 |
| 0.626559973 | 0.581709981 | 0.209470004 |
| 0.251549989 | 0.831560016 | 0.211190000 |
| 0.001120000 | 0.332850009 | 0.210740000 |
| 0.249909997 | 0.496549994 | 0.308389992 |
| 0.375310004 | 0.249239996 | 0.308270007 |
| 0.754499972 | 0.001140000 | 0.311190009 |
| 0.875270009 | 0.748170018 | 0.314020008 |
| 0.000420000 | 0.993359983 | 0.313879997 |
| 0.128069997 | 0.245069996 | 0.314990014 |
| 0.375239998 | 0.748690009 | 0.319310009 |
| 0.503289998 | 0.999480009 | 0.318179995 |



|             |             |             |
|-------------|-------------|-------------|
| 0.754849970 | 0.492689997 | 0.316379994 |
| 0.630530000 | 0.752219975 | 0.315640002 |
| 0.125970006 | 0.745289981 | 0.316109985 |
| 0.624300003 | 0.245409995 | 0.317860007 |
| 0.246429995 | 0.996370018 | 0.319680005 |
| 0.879970014 | 0.245120004 | 0.319279999 |
| 0.500970006 | 0.503470004 | 0.321509987 |
| 0.006190000 | 0.496740013 | 0.324019998 |

## H

1.0

|               |              |               |
|---------------|--------------|---------------|
| 11.1216001511 | 0.0000000000 | 0.0000000000  |
| 0.0000000000  | 9.6316003799 | 0.0000000000  |
| 0.0000000000  | 0.0000000000 | 21.7964000702 |

| C | H | O | Pt |
|---|---|---|----|
| 7 | 1 | 7 | 64 |

Direct

|             |             |             |
|-------------|-------------|-------------|
| 0.879220009 | 0.069169998 | 0.378780007 |
| 0.751529992 | 0.739069998 | 0.383240014 |
| 0.873660028 | 0.409029990 | 0.382789999 |
| 0.206090003 | 0.130250007 | 0.384530008 |
| 0.549679995 | 0.122290000 | 0.385789990 |
| 0.435970008 | 0.628180027 | 0.386159986 |
| 0.077760004 | 0.632269979 | 0.388590008 |
| 0.619840026 | 0.414240003 | 0.358870000 |
| 0.876550019 | 0.060660001 | 0.433219999 |
| 0.753229976 | 0.737010002 | 0.437359989 |
| 0.865809977 | 0.409960002 | 0.437180012 |
| 0.212029994 | 0.137600005 | 0.438510001 |
| 0.545599997 | 0.126640007 | 0.439799994 |
| 0.435400009 | 0.626470029 | 0.440250009 |
| 0.082520001 | 0.632879972 | 0.442519993 |
| 0.000000000 | 0.000000000 | 0.000000000 |
| 0.000000000 | 0.500000000 | 0.000000000 |
| 0.125000000 | 0.250000000 | 0.000000000 |
| 0.125000000 | 0.750000000 | 0.000000000 |
| 0.250000000 | 0.000000000 | 0.000000000 |
| 0.250000000 | 0.500000000 | 0.000000000 |
| 0.375000000 | 0.250000000 | 0.000000000 |
| 0.375000000 | 0.750000000 | 0.000000000 |
| 0.500000000 | 0.000000000 | 0.000000000 |
| 0.500000000 | 0.500000000 | 0.000000000 |

|             |             |             |
|-------------|-------------|-------------|
| 0.625000000 | 0.250000000 | 0.000000000 |
| 0.625000000 | 0.750000000 | 0.000000000 |
| 0.750000000 | 0.000000000 | 0.000000000 |
| 0.750000000 | 0.500000000 | 0.000000000 |
| 0.875000000 | 0.250000000 | 0.000000000 |
| 0.875000000 | 0.750000000 | 0.000000000 |
| 0.000000000 | 0.166669995 | 0.103940003 |
| 0.000000000 | 0.666670024 | 0.103940003 |
| 0.125000000 | 0.416669995 | 0.103940003 |
| 0.125000000 | 0.916670024 | 0.103940003 |
| 0.250000000 | 0.166669995 | 0.103940003 |
| 0.250000000 | 0.666670024 | 0.103940003 |
| 0.375000000 | 0.416669995 | 0.103940003 |
| 0.375000000 | 0.916670024 | 0.103940003 |
| 0.500000000 | 0.166669995 | 0.103940003 |
| 0.500000000 | 0.666670024 | 0.103940003 |
| 0.625000000 | 0.416669995 | 0.103940003 |
| 0.625000000 | 0.916670024 | 0.103940003 |
| 0.750000000 | 0.166669995 | 0.103940003 |
| 0.750000000 | 0.666670024 | 0.103940003 |
| 0.875000000 | 0.416669995 | 0.103940003 |
| 0.875000000 | 0.916670024 | 0.103940003 |
| 0.248940006 | 0.330100000 | 0.205139995 |
| 0.750829995 | 0.833739996 | 0.206159994 |
| 0.377440006 | 0.583580017 | 0.206550002 |
| 0.877409995 | 0.085919999 | 0.207059994 |
| 0.375440001 | 0.078599997 | 0.207000002 |
| 0.122749999 | 0.581470013 | 0.207240000 |
| 0.125389993 | 0.079580002 | 0.207560003 |
| 0.625660002 | 0.084150001 | 0.207770005 |
| 0.502560019 | 0.335359991 | 0.207719997 |
| 0.875270009 | 0.579649985 | 0.208710000 |
| 0.999559999 | 0.830449998 | 0.208790004 |
| 0.627290010 | 0.582059979 | 0.209040001 |
| 0.750549972 | 0.331090003 | 0.209299996 |
| 0.502179980 | 0.833029985 | 0.209930003 |
| 0.250600010 | 0.830869973 | 0.210490003 |
| 0.001420000 | 0.333339989 | 0.210850000 |
| 0.251659989 | 0.494120002 | 0.307500005 |
| 0.375099987 | 0.250420004 | 0.307550013 |
| 0.754599988 | 0.001910000 | 0.311479986 |

|             |             |             |
|-------------|-------------|-------------|
| 0.002150000 | 0.993979990 | 0.314379990 |
| 0.874740005 | 0.748239994 | 0.314460009 |
| 0.628849983 | 0.752810001 | 0.315299988 |
| 0.131320000 | 0.244990006 | 0.316399992 |
| 0.500500023 | 0.996730030 | 0.317140013 |
| 0.128299996 | 0.746200025 | 0.316969991 |
| 0.753220022 | 0.492379993 | 0.316769987 |
| 0.375860006 | 0.749499977 | 0.317530006 |
| 0.251199991 | 0.993239999 | 0.318280011 |
| 0.621630013 | 0.244690001 | 0.318470001 |
| 0.497509986 | 0.501089990 | 0.318340003 |
| 0.880940020 | 0.245749995 | 0.319040000 |
| 0.007110000 | 0.496980011 | 0.323480010 |

**CO2-H**

1.0

|               |              |               |
|---------------|--------------|---------------|
| 11.1216001511 | 0.0000000000 | 0.0000000000  |
| 0.0000000000  | 9.6316003799 | 0.0000000000  |
| 0.0000000000  | 0.0000000000 | 21.7964000702 |

| C | H | O | Pt |
|---|---|---|----|
| 8 | 1 | 9 | 64 |

Direct

|             |             |             |
|-------------|-------------|-------------|
| 0.879459977 | 0.070249997 | 0.378670007 |
| 0.873319983 | 0.409750015 | 0.382820010 |
| 0.752059996 | 0.739790022 | 0.383289993 |
| 0.564260006 | 0.112740003 | 0.386150002 |
| 0.194820002 | 0.122309998 | 0.384880006 |
| 0.444790006 | 0.637989998 | 0.385630012 |
| 0.075719997 | 0.634249985 | 0.388579994 |
| 0.319099993 | 0.380800009 | 0.488189995 |
| 0.618550003 | 0.413260013 | 0.359499991 |
| 0.876829982 | 0.061710000 | 0.433079988 |
| 0.865660012 | 0.410690010 | 0.437220007 |
| 0.753470004 | 0.737890005 | 0.437409997 |
| 0.570500016 | 0.107950002 | 0.440030009 |
| 0.193749994 | 0.124619998 | 0.439069986 |
| 0.448610008 | 0.641680002 | 0.439740002 |
| 0.078879997 | 0.636160016 | 0.442539990 |
| 0.394609988 | 0.335079998 | 0.456059992 |
| 0.243469998 | 0.426840007 | 0.519729972 |
| 0.000000000 | 0.000000000 | 0.000000000 |
| 0.000000000 | 0.500000000 | 0.000000000 |

|             |             |             |
|-------------|-------------|-------------|
| 0.125000000 | 0.250000000 | 0.000000000 |
| 0.125000000 | 0.750000000 | 0.000000000 |
| 0.250000000 | 0.000000000 | 0.000000000 |
| 0.250000000 | 0.500000000 | 0.000000000 |
| 0.375000000 | 0.250000000 | 0.000000000 |
| 0.375000000 | 0.750000000 | 0.000000000 |
| 0.500000000 | 0.000000000 | 0.000000000 |
| 0.500000000 | 0.500000000 | 0.000000000 |
| 0.625000000 | 0.250000000 | 0.000000000 |
| 0.625000000 | 0.750000000 | 0.000000000 |
| 0.750000000 | 0.000000000 | 0.000000000 |
| 0.750000000 | 0.500000000 | 0.000000000 |
| 0.875000000 | 0.250000000 | 0.000000000 |
| 0.875000000 | 0.750000000 | 0.000000000 |
| 0.000000000 | 0.166669995 | 0.103940003 |
| 0.000000000 | 0.666670024 | 0.103940003 |
| 0.125000000 | 0.416669995 | 0.103940003 |
| 0.125000000 | 0.916670024 | 0.103940003 |
| 0.250000000 | 0.166669995 | 0.103940003 |
| 0.250000000 | 0.666670024 | 0.103940003 |
| 0.375000000 | 0.416669995 | 0.103940003 |
| 0.375000000 | 0.916670024 | 0.103940003 |
| 0.500000000 | 0.166669995 | 0.103940003 |
| 0.500000000 | 0.666670024 | 0.103940003 |
| 0.625000000 | 0.416669995 | 0.103940003 |
| 0.625000000 | 0.916670024 | 0.103940003 |
| 0.750000000 | 0.166669995 | 0.103940003 |
| 0.750000000 | 0.666670024 | 0.103940003 |
| 0.875000000 | 0.416669995 | 0.103940003 |
| 0.875000000 | 0.916670024 | 0.103940003 |
| 0.248809993 | 0.330399990 | 0.205210000 |
| 0.750790000 | 0.834079981 | 0.206169993 |
| 0.377490014 | 0.583440006 | 0.206660002 |
| 0.502860010 | 0.335949987 | 0.207849994 |
| 0.122819997 | 0.581619978 | 0.207310006 |
| 0.877349973 | 0.086470000 | 0.206990004 |
| 0.375470012 | 0.078960001 | 0.207059994 |
| 0.625689983 | 0.084830001 | 0.207690001 |
| 0.125379995 | 0.080100000 | 0.207450002 |
| 0.875349998 | 0.579959989 | 0.208739996 |
| 0.750599980 | 0.331669986 | 0.209360003 |

|             |             |             |
|-------------|-------------|-------------|
| 0.627449989 | 0.582409978 | 0.209059998 |
| 0.999589980 | 0.830730021 | 0.208739996 |
| 0.502359986 | 0.833150029 | 0.209649995 |
| 0.001460000 | 0.333799988 | 0.210869998 |
| 0.250519991 | 0.830890000 | 0.210290000 |
| 0.252000004 | 0.494480014 | 0.307850003 |
| 0.375420004 | 0.251280010 | 0.307370007 |
| 0.754840016 | 0.002430000 | 0.311239988 |
| 0.001930000 | 0.994530022 | 0.314119995 |
| 0.752950013 | 0.492819995 | 0.316909999 |
| 0.874809980 | 0.748719990 | 0.314429998 |
| 0.628929973 | 0.753289998 | 0.315380007 |
| 0.131850004 | 0.245570004 | 0.316760004 |
| 0.621399999 | 0.245220006 | 0.318859994 |
| 0.497539997 | 0.502020001 | 0.318899989 |
| 0.128490001 | 0.746479988 | 0.316909999 |
| 0.500220001 | 0.998170018 | 0.316810012 |
| 0.881079972 | 0.246639997 | 0.319040000 |
| 0.251289994 | 0.994159997 | 0.317979991 |
| 0.375510007 | 0.750680029 | 0.316850007 |
| 0.007250000 | 0.497460008 | 0.323540002 |

**COOH**

1.0

|               |              |               |
|---------------|--------------|---------------|
| 11.1216001511 | 0.0000000000 | 0.0000000000  |
| 0.0000000000  | 9.6316003799 | 0.0000000000  |
| 0.0000000000  | 0.0000000000 | 21.7964000702 |

| C | H | O | Pt |
|---|---|---|----|
| 8 | 1 | 9 | 64 |

Direct

|             |             |             |
|-------------|-------------|-------------|
| 0.885559976 | 0.076710001 | 0.381009996 |
| 0.858359993 | 0.412180007 | 0.381480008 |
| 0.757679999 | 0.748839974 | 0.385490000 |
| 0.605979979 | 0.093510002 | 0.376349986 |
| 0.176510006 | 0.112690002 | 0.383949995 |
| 0.483240008 | 0.659070015 | 0.378789991 |
| 0.064340003 | 0.638729990 | 0.387800008 |
| 0.359290004 | 0.335200012 | 0.404150009 |
| 0.471890002 | 0.211689994 | 0.444909990 |
| 0.888270020 | 0.072240002 | 0.435429990 |
| 0.851189971 | 0.416200012 | 0.435820013 |
| 0.762809992 | 0.746330023 | 0.439429998 |

|             |             |             |
|-------------|-------------|-------------|
| 0.596499979 | 0.101899996 | 0.431529999 |
| 0.169080004 | 0.114110000 | 0.437990010 |
| 0.481550008 | 0.652260005 | 0.433299989 |
| 0.064369999 | 0.640600026 | 0.441749990 |
| 0.412230015 | 0.286769986 | 0.453330010 |
| 0.288960010 | 0.436479986 | 0.409640014 |
| 0.000000000 | 0.000000000 | 0.000000000 |
| 0.000000000 | 0.500000000 | 0.000000000 |
| 0.125000000 | 0.250000000 | 0.000000000 |
| 0.125000000 | 0.750000000 | 0.000000000 |
| 0.250000000 | 0.000000000 | 0.000000000 |
| 0.250000000 | 0.500000000 | 0.000000000 |
| 0.375000000 | 0.250000000 | 0.000000000 |
| 0.375000000 | 0.750000000 | 0.000000000 |
| 0.500000000 | 0.000000000 | 0.000000000 |
| 0.500000000 | 0.500000000 | 0.000000000 |
| 0.625000000 | 0.250000000 | 0.000000000 |
| 0.625000000 | 0.750000000 | 0.000000000 |
| 0.750000000 | 0.000000000 | 0.000000000 |
| 0.750000000 | 0.500000000 | 0.000000000 |
| 0.875000000 | 0.250000000 | 0.000000000 |
| 0.875000000 | 0.750000000 | 0.000000000 |
| 0.000000000 | 0.166669995 | 0.103940003 |
| 0.000000000 | 0.666670024 | 0.103940003 |
| 0.125000000 | 0.416669995 | 0.103940003 |
| 0.125000000 | 0.916670024 | 0.103940003 |
| 0.250000000 | 0.166669995 | 0.103940003 |
| 0.250000000 | 0.666670024 | 0.103940003 |
| 0.375000000 | 0.416669995 | 0.103940003 |
| 0.375000000 | 0.916670024 | 0.103940003 |
| 0.500000000 | 0.166669995 | 0.103940003 |
| 0.500000000 | 0.666670024 | 0.103940003 |
| 0.625000000 | 0.416669995 | 0.103940003 |
| 0.625000000 | 0.916670024 | 0.103940003 |
| 0.750000000 | 0.166669995 | 0.103940003 |
| 0.750000000 | 0.666670024 | 0.103940003 |
| 0.875000000 | 0.416669995 | 0.103940003 |
| 0.875000000 | 0.916670024 | 0.103940003 |
| 0.249180004 | 0.330309987 | 0.206970006 |
| 0.747160017 | 0.835240006 | 0.208179995 |
| 0.373490006 | 0.583989978 | 0.206740007 |

|             |             |             |
|-------------|-------------|-------------|
| 0.498530000 | 0.334329993 | 0.207499996 |
| 0.124580003 | 0.580529988 | 0.208770007 |
| 0.872780025 | 0.084739998 | 0.208140001 |
| 0.373750001 | 0.084610000 | 0.209380001 |
| 0.623899996 | 0.083039999 | 0.207249999 |
| 0.123269998 | 0.079839997 | 0.206770003 |
| 0.876550019 | 0.582090020 | 0.207580000 |
| 0.750729978 | 0.331620008 | 0.207130000 |
| 0.627210021 | 0.583859980 | 0.207210004 |
| 0.997940004 | 0.831260026 | 0.208619997 |
| 0.500530005 | 0.832849979 | 0.208700001 |
| 0.000730000 | 0.333539993 | 0.210109994 |
| 0.248760000 | 0.832729995 | 0.209670007 |
| 0.248030007 | 0.496019989 | 0.311769992 |
| 0.376349986 | 0.257149994 | 0.319130003 |
| 0.744350016 | 0.007170000 | 0.319720000 |
| 0.995469987 | 0.996070027 | 0.313380003 |
| 0.750230014 | 0.494709998 | 0.313059986 |
| 0.869759977 | 0.752149999 | 0.313239992 |
| 0.624239981 | 0.751550019 | 0.320490003 |
| 0.126670003 | 0.243110001 | 0.314249992 |
| 0.620490015 | 0.253210008 | 0.312709987 |
| 0.503250003 | 0.503130019 | 0.311749995 |
| 0.124940000 | 0.748489976 | 0.317050010 |
| 0.493409991 | 0.001540000 | 0.314420015 |
| 0.877560019 | 0.249190003 | 0.318639994 |
| 0.247060001 | 0.994650006 | 0.317279994 |
| 0.372000009 | 0.752479970 | 0.315439999 |
| 0.002130000 | 0.499639988 | 0.322299987 |

**COOH-H**

1.0

|               |              |               |
|---------------|--------------|---------------|
| 11.1216001511 | 0.0000000000 | 0.0000000000  |
| 0.0000000000  | 9.6316003799 | 0.0000000000  |
| 0.0000000000  | 0.0000000000 | 21.7964000702 |

| C | H | O | Pt |
|---|---|---|----|
| 8 | 2 | 9 | 64 |

Direct

|             |             |             |
|-------------|-------------|-------------|
| 0.606109977 | 0.089659996 | 0.377420008 |
| 0.885280013 | 0.075309999 | 0.380879998 |
| 0.871479988 | 0.409869999 | 0.381989986 |
| 0.756730020 | 0.745389998 | 0.384939998 |

|             |             |             |
|-------------|-------------|-------------|
| 0.478430003 | 0.663550019 | 0.379999995 |
| 0.174410000 | 0.110820003 | 0.383800000 |
| 0.066299997 | 0.640839994 | 0.388159990 |
| 0.357439995 | 0.331779987 | 0.404309988 |
| 0.621540010 | 0.414270014 | 0.355809987 |
| 0.469110012 | 0.205980003 | 0.444660008 |
| 0.287959993 | 0.433420002 | 0.410360008 |
| 0.596319973 | 0.096490003 | 0.432559997 |
| 0.888570011 | 0.071999997 | 0.435310006 |
| 0.862119973 | 0.410869986 | 0.436320007 |
| 0.761380017 | 0.741720021 | 0.438930005 |
| 0.479600012 | 0.658379972 | 0.434460014 |
| 0.165840000 | 0.112130001 | 0.437790006 |
| 0.065940000 | 0.643410027 | 0.442090005 |
| 0.410659999 | 0.282040000 | 0.453260005 |
| 0.000000000 | 0.000000000 | 0.000000000 |
| 0.000000000 | 0.500000000 | 0.000000000 |
| 0.125000000 | 0.250000000 | 0.000000000 |
| 0.125000000 | 0.750000000 | 0.000000000 |
| 0.250000000 | 0.000000000 | 0.000000000 |
| 0.250000000 | 0.500000000 | 0.000000000 |
| 0.375000000 | 0.250000000 | 0.000000000 |
| 0.375000000 | 0.750000000 | 0.000000000 |
| 0.500000000 | 0.000000000 | 0.000000000 |
| 0.500000000 | 0.500000000 | 0.000000000 |
| 0.625000000 | 0.250000000 | 0.000000000 |
| 0.625000000 | 0.750000000 | 0.000000000 |
| 0.750000000 | 0.000000000 | 0.000000000 |
| 0.750000000 | 0.500000000 | 0.000000000 |
| 0.875000000 | 0.250000000 | 0.000000000 |
| 0.875000000 | 0.750000000 | 0.000000000 |
| 0.000000000 | 0.166669995 | 0.103940003 |
| 0.000000000 | 0.666670024 | 0.103940003 |
| 0.125000000 | 0.416669995 | 0.103940003 |
| 0.125000000 | 0.916670024 | 0.103940003 |
| 0.250000000 | 0.166669995 | 0.103940003 |
| 0.250000000 | 0.666670024 | 0.103940003 |
| 0.375000000 | 0.416669995 | 0.103940003 |
| 0.375000000 | 0.916670024 | 0.103940003 |
| 0.500000000 | 0.166669995 | 0.103940003 |
| 0.500000000 | 0.666670024 | 0.103940003 |



|             |             |             |
|-------------|-------------|-------------|
| 0.625000000 | 0.416669995 | 0.103940003 |
| 0.625000000 | 0.916670024 | 0.103940003 |
| 0.750000000 | 0.166669995 | 0.103940003 |
| 0.750000000 | 0.666670024 | 0.103940003 |
| 0.875000000 | 0.416669995 | 0.103940003 |
| 0.875000000 | 0.916670024 | 0.103940003 |
| 0.123649999 | 0.079379998 | 0.206660002 |
| 0.747259974 | 0.835659981 | 0.208010003 |
| 0.750729978 | 0.332450002 | 0.207550004 |
| 0.249449998 | 0.330110013 | 0.206790000 |
| 0.374280006 | 0.583199978 | 0.207090005 |
| 0.624239981 | 0.084330000 | 0.207460001 |
| 0.627089977 | 0.583809972 | 0.207479998 |
| 0.875750005 | 0.581359982 | 0.208059996 |
| 0.872979999 | 0.084830001 | 0.208100006 |
| 0.997839987 | 0.830640018 | 0.208489999 |
| 0.124360003 | 0.580200016 | 0.208629996 |
| 0.498899996 | 0.334890008 | 0.207890004 |
| 0.500720024 | 0.833090007 | 0.208560005 |
| 0.000890000 | 0.333550006 | 0.209910005 |
| 0.374080002 | 0.084430002 | 0.209360003 |
| 0.249100000 | 0.832059979 | 0.209600002 |
| 0.248249993 | 0.495330006 | 0.311549991 |
| 0.996100008 | 0.995270014 | 0.313160002 |
| 0.620450020 | 0.249589995 | 0.313059986 |
| 0.870230019 | 0.752170026 | 0.313160002 |
| 0.753759980 | 0.495539993 | 0.315079987 |
| 0.127030000 | 0.242540002 | 0.314040005 |
| 0.501250029 | 0.505400002 | 0.313459992 |
| 0.624319971 | 0.753229976 | 0.319700003 |
| 0.493710011 | 0.001010000 | 0.314359993 |
| 0.125229999 | 0.748319983 | 0.316799998 |
| 0.371459991 | 0.752849996 | 0.315329999 |
| 0.879299998 | 0.247820005 | 0.317860007 |
| 0.247370005 | 0.994340003 | 0.317279994 |
| 0.745230019 | 0.006520000 | 0.320030004 |
| 0.003800000 | 0.499520004 | 0.322800010 |
| 0.374749988 | 0.255439997 | 0.318940014 |

**CO-H2O**

1.0

|               |              |              |
|---------------|--------------|--------------|
| 11.1216001511 | 0.0000000000 | 0.0000000000 |
|---------------|--------------|--------------|

|             |              |              |               |
|-------------|--------------|--------------|---------------|
|             | 0.0000000000 | 9.6316003799 | 0.0000000000  |
|             | 0.0000000000 | 0.0000000000 | 21.7964000702 |
| C           | H            | O            | Pt            |
| 8           | 2            | 9            | 64            |
| Direct      |              |              |               |
| 0.554979980 | 0.132290006  | 0.383830011  |               |
| 0.877139986 | 0.069890000  | 0.378259987  |               |
| 0.869889975 | 0.411920011  | 0.380730003  |               |
| 0.764400005 | 0.742550015  | 0.387580007  |               |
| 0.482910007 | 0.758390009  | 0.389770001  |               |
| 0.193240002 | 0.127039999  | 0.384409994  |               |
| 0.076080002 | 0.634019971  | 0.387989998  |               |
| 0.369870007 | 0.419910014  | 0.375860006  |               |
| 0.545539975 | 0.433910012  | 0.469529986  |               |
| 0.685530007 | 0.441139996  | 0.466549993  |               |
| 0.365480006 | 0.415459991  | 0.430669993  |               |
| 0.553309977 | 0.134719998  | 0.438019991  |               |
| 0.875249982 | 0.062880002  | 0.432770014  |               |
| 0.863189995 | 0.412869990  | 0.435440004  |               |
| 0.776369989 | 0.742359996  | 0.441190004  |               |
| 0.476310015 | 0.763999999  | 0.443520010  |               |
| 0.193299994 | 0.131119996  | 0.438529998  |               |
| 0.078699999 | 0.635240018  | 0.441949993  |               |
| 0.612280011 | 0.483880013  | 0.450780004  |               |
| 0.000000000 | 0.000000000  | 0.000000000  |               |
| 0.000000000 | 0.500000000  | 0.000000000  |               |
| 0.125000000 | 0.250000000  | 0.000000000  |               |
| 0.125000000 | 0.750000000  | 0.000000000  |               |
| 0.250000000 | 0.000000000  | 0.000000000  |               |
| 0.250000000 | 0.500000000  | 0.000000000  |               |
| 0.375000000 | 0.250000000  | 0.000000000  |               |
| 0.375000000 | 0.750000000  | 0.000000000  |               |
| 0.500000000 | 0.000000000  | 0.000000000  |               |
| 0.500000000 | 0.500000000  | 0.000000000  |               |
| 0.625000000 | 0.250000000  | 0.000000000  |               |
| 0.625000000 | 0.750000000  | 0.000000000  |               |
| 0.750000000 | 0.000000000  | 0.000000000  |               |
| 0.750000000 | 0.500000000  | 0.000000000  |               |
| 0.875000000 | 0.250000000  | 0.000000000  |               |
| 0.875000000 | 0.750000000  | 0.000000000  |               |
| 0.000000000 | 0.166669995  | 0.103940003  |               |

|             |             |             |
|-------------|-------------|-------------|
| 0.00000000  | 0.666670024 | 0.103940003 |
| 0.125000000 | 0.416669995 | 0.103940003 |
| 0.125000000 | 0.916670024 | 0.103940003 |
| 0.250000000 | 0.166669995 | 0.103940003 |
| 0.250000000 | 0.666670024 | 0.103940003 |
| 0.375000000 | 0.416669995 | 0.103940003 |
| 0.375000000 | 0.916670024 | 0.103940003 |
| 0.500000000 | 0.166669995 | 0.103940003 |
| 0.500000000 | 0.666670024 | 0.103940003 |
| 0.625000000 | 0.416669995 | 0.103940003 |
| 0.625000000 | 0.916670024 | 0.103940003 |
| 0.750000000 | 0.166669995 | 0.103940003 |
| 0.750000000 | 0.666670024 | 0.103940003 |
| 0.875000000 | 0.416669995 | 0.103940003 |
| 0.875000000 | 0.916670024 | 0.103940003 |
| 0.124519996 | 0.079729997 | 0.207120001 |
| 0.747539997 | 0.830479980 | 0.207690001 |
| 0.749970019 | 0.330680013 | 0.208169997 |
| 0.249489993 | 0.331299990 | 0.206300005 |
| 0.376509994 | 0.585609972 | 0.207320005 |
| 0.625779986 | 0.081840001 | 0.207059994 |
| 0.625129998 | 0.582790017 | 0.209959999 |
| 0.875739992 | 0.579859972 | 0.207640007 |
| 0.876330018 | 0.084770001 | 0.206660002 |
| 0.999050021 | 0.829429984 | 0.208519995 |
| 0.125170007 | 0.580139995 | 0.208260000 |
| 0.500819981 | 0.333629996 | 0.206660002 |
| 0.502399981 | 0.834100008 | 0.209610000 |
| 0.001390000 | 0.333290011 | 0.210500002 |
| 0.374779999 | 0.082120001 | 0.207969993 |
| 0.250400007 | 0.832220018 | 0.210439995 |
| 0.253060013 | 0.500020027 | 0.311969995 |
| 0.999719977 | 0.993539989 | 0.313789994 |
| 0.626030028 | 0.247920007 | 0.315629989 |
| 0.871249974 | 0.747619987 | 0.313279986 |
| 0.750469983 | 0.491780013 | 0.314110011 |
| 0.127200007 | 0.244939998 | 0.315079987 |
| 0.504040003 | 0.496549994 | 0.315970004 |
| 0.623929977 | 0.749400020 | 0.326599985 |
| 0.501209974 | 0.003540000 | 0.316040009 |
| 0.128179997 | 0.747330010 | 0.316359997 |

|             |             |             |
|-------------|-------------|-------------|
| 0.376610011 | 0.755490005 | 0.316210002 |
| 0.878690004 | 0.246669993 | 0.318459988 |
| 0.248579994 | 0.996640027 | 0.317730010 |
| 0.753329992 | 0.000720000 | 0.311329991 |
| 0.005700000 | 0.498490006 | 0.322629988 |
| 0.375270009 | 0.251249999 | 0.312390000 |

**CO**

1.0

|               |              |               |
|---------------|--------------|---------------|
| 11.1216001511 | 0.0000000000 | 0.0000000000  |
| 0.0000000000  | 9.6316003799 | 0.0000000000  |
| 0.0000000000  | 0.0000000000 | 21.7964000702 |

|   |   |    |
|---|---|----|
| C | O | Pt |
| 8 | 8 | 64 |

Direct

|             |             |             |
|-------------|-------------|-------------|
| 0.552730024 | 0.132499993 | 0.384200007 |
| 0.875209987 | 0.069810003 | 0.378360003 |
| 0.330269992 | 0.390700012 | 0.382679999 |
| 0.862259984 | 0.411379993 | 0.381839991 |
| 0.762539983 | 0.745739996 | 0.385899991 |
| 0.488680005 | 0.667100012 | 0.379979998 |
| 0.180910006 | 0.112319998 | 0.384710014 |
| 0.073940001 | 0.632430017 | 0.388260007 |
| 0.552429974 | 0.135649994 | 0.438320011 |
| 0.874069989 | 0.060720000 | 0.432770014 |
| 0.854189992 | 0.414940000 | 0.436170012 |
| 0.769360006 | 0.743560016 | 0.439749986 |
| 0.483980000 | 0.659879982 | 0.434430003 |
| 0.334609985 | 0.391550004 | 0.436720014 |
| 0.175150007 | 0.114110000 | 0.438710004 |
| 0.076329999 | 0.635060012 | 0.442209989 |
| 0.000000000 | 0.000000000 | 0.000000000 |
| 0.000000000 | 0.500000000 | 0.000000000 |
| 0.125000000 | 0.250000000 | 0.000000000 |
| 0.125000000 | 0.750000000 | 0.000000000 |
| 0.250000000 | 0.000000000 | 0.000000000 |
| 0.250000000 | 0.500000000 | 0.000000000 |
| 0.375000000 | 0.250000000 | 0.000000000 |
| 0.375000000 | 0.750000000 | 0.000000000 |
| 0.500000000 | 0.000000000 | 0.000000000 |
| 0.500000000 | 0.500000000 | 0.000000000 |
| 0.625000000 | 0.250000000 | 0.000000000 |

|             |             |             |
|-------------|-------------|-------------|
| 0.625000000 | 0.750000000 | 0.000000000 |
| 0.750000000 | 0.000000000 | 0.000000000 |
| 0.750000000 | 0.500000000 | 0.000000000 |
| 0.875000000 | 0.250000000 | 0.000000000 |
| 0.875000000 | 0.750000000 | 0.000000000 |
| 0.000000000 | 0.166669995 | 0.103940003 |
| 0.000000000 | 0.666670024 | 0.103940003 |
| 0.125000000 | 0.416669995 | 0.103940003 |
| 0.125000000 | 0.916670024 | 0.103940003 |
| 0.250000000 | 0.166669995 | 0.103940003 |
| 0.250000000 | 0.666670024 | 0.103940003 |
| 0.375000000 | 0.416669995 | 0.103940003 |
| 0.375000000 | 0.916670024 | 0.103940003 |
| 0.500000000 | 0.166669995 | 0.103940003 |
| 0.500000000 | 0.666670024 | 0.103940003 |
| 0.625000000 | 0.416669995 | 0.103940003 |
| 0.625000000 | 0.916670024 | 0.103940003 |
| 0.750000000 | 0.166669995 | 0.103940003 |
| 0.750000000 | 0.666670024 | 0.103940003 |
| 0.875000000 | 0.416669995 | 0.103940003 |
| 0.875000000 | 0.916670024 | 0.103940003 |
| 0.124750003 | 0.079329997 | 0.207020000 |
| 0.748279989 | 0.831640005 | 0.207169995 |
| 0.249239996 | 0.330440015 | 0.206650004 |
| 0.749849975 | 0.330199987 | 0.207949996 |
| 0.626619995 | 0.583270013 | 0.208269998 |
| 0.375120014 | 0.584450006 | 0.207130000 |
| 0.875720024 | 0.084720001 | 0.206799999 |
| 0.877009988 | 0.579379976 | 0.207519993 |
| 0.624409974 | 0.082939997 | 0.207230002 |
| 0.125790000 | 0.579010010 | 0.209059998 |
| 0.999610007 | 0.829060018 | 0.208350003 |
| 0.500029981 | 0.335139990 | 0.207450002 |
| 0.501760006 | 0.834529996 | 0.209680006 |
| 0.001170000 | 0.332700014 | 0.210800007 |
| 0.374850005 | 0.083750002 | 0.209030002 |
| 0.250310004 | 0.832130015 | 0.209779993 |
| 0.251489997 | 0.496569991 | 0.313849986 |
| 0.998679996 | 0.993160009 | 0.313360006 |
| 0.873210013 | 0.747780025 | 0.313169986 |
| 0.126000002 | 0.240490004 | 0.315160006 |

|             |             |             |
|-------------|-------------|-------------|
| 0.623290002 | 0.249430001 | 0.315479994 |
| 0.627229989 | 0.752810001 | 0.322010010 |
| 0.751590014 | 0.491780013 | 0.313129991 |
| 0.499480009 | 0.001730000 | 0.317299992 |
| 0.505389988 | 0.503250003 | 0.314639986 |
| 0.127660006 | 0.745559990 | 0.316610008 |
| 0.375699997 | 0.754069984 | 0.315439999 |
| 0.877080023 | 0.246240005 | 0.319189996 |
| 0.248989999 | 0.993229985 | 0.317620009 |
| 0.751600027 | 0.001190000 | 0.311329991 |
| 0.375270009 | 0.253410012 | 0.314799994 |
| 0.004390000 | 0.496829987 | 0.323300004 |

**CO-H**

1.0

|               |              |               |
|---------------|--------------|---------------|
| 11.1216001511 | 0.0000000000 | 0.0000000000  |
| 0.0000000000  | 9.6316003799 | 0.0000000000  |
| 0.0000000000  | 0.0000000000 | 21.7964000702 |

| C | H | O | Pt |
|---|---|---|----|
| 8 | 1 | 8 | 64 |

Direct

|             |             |             |
|-------------|-------------|-------------|
| 0.556360006 | 0.124339998 | 0.384889990 |
| 0.878350019 | 0.068190001 | 0.378410012 |
| 0.370160013 | 0.417490005 | 0.376569986 |
| 0.874840021 | 0.409220010 | 0.382620007 |
| 0.765209973 | 0.739809990 | 0.386649996 |
| 0.483660012 | 0.745620012 | 0.388720006 |
| 0.193030000 | 0.125019997 | 0.384510010 |
| 0.079000004 | 0.633669972 | 0.388520002 |
| 0.626049995 | 0.415850013 | 0.356929988 |
| 0.555360019 | 0.125340000 | 0.438950002 |
| 0.876689970 | 0.059769999 | 0.432830006 |
| 0.865530014 | 0.409310013 | 0.436940014 |
| 0.775170028 | 0.737380028 | 0.440420002 |
| 0.478709996 | 0.741880000 | 0.442640007 |
| 0.369899988 | 0.412519991 | 0.431149989 |
| 0.192729995 | 0.128539994 | 0.438620001 |
| 0.082419999 | 0.635519981 | 0.442449987 |
| 0.000000000 | 0.000000000 | 0.000000000 |
| 0.000000000 | 0.500000000 | 0.000000000 |
| 0.125000000 | 0.250000000 | 0.000000000 |
| 0.125000000 | 0.750000000 | 0.000000000 |

|             |             |             |
|-------------|-------------|-------------|
| 0.250000000 | 0.000000000 | 0.000000000 |
| 0.250000000 | 0.500000000 | 0.000000000 |
| 0.375000000 | 0.250000000 | 0.000000000 |
| 0.375000000 | 0.750000000 | 0.000000000 |
| 0.500000000 | 0.000000000 | 0.000000000 |
| 0.500000000 | 0.500000000 | 0.000000000 |
| 0.625000000 | 0.250000000 | 0.000000000 |
| 0.625000000 | 0.750000000 | 0.000000000 |
| 0.750000000 | 0.000000000 | 0.000000000 |
| 0.750000000 | 0.500000000 | 0.000000000 |
| 0.875000000 | 0.250000000 | 0.000000000 |
| 0.875000000 | 0.750000000 | 0.000000000 |
| 0.000000000 | 0.166669995 | 0.103940003 |
| 0.000000000 | 0.666670024 | 0.103940003 |
| 0.125000000 | 0.416669995 | 0.103940003 |
| 0.125000000 | 0.916670024 | 0.103940003 |
| 0.250000000 | 0.166669995 | 0.103940003 |
| 0.250000000 | 0.666670024 | 0.103940003 |
| 0.375000000 | 0.416669995 | 0.103940003 |
| 0.375000000 | 0.916670024 | 0.103940003 |
| 0.500000000 | 0.166669995 | 0.103940003 |
| 0.500000000 | 0.666670024 | 0.103940003 |
| 0.625000000 | 0.416669995 | 0.103940003 |
| 0.625000000 | 0.916670024 | 0.103940003 |
| 0.750000000 | 0.166669995 | 0.103940003 |
| 0.750000000 | 0.666670024 | 0.103940003 |
| 0.875000000 | 0.416669995 | 0.103940003 |
| 0.875000000 | 0.916670024 | 0.103940003 |
| 0.124860004 | 0.079369999 | 0.207020000 |
| 0.747910023 | 0.830690026 | 0.207509995 |
| 0.249420002 | 0.331200004 | 0.206239998 |
| 0.750519991 | 0.330650002 | 0.208719999 |
| 0.625930011 | 0.582120001 | 0.209900007 |
| 0.376980007 | 0.584609985 | 0.207320005 |
| 0.876959980 | 0.084930003 | 0.206630006 |
| 0.875419974 | 0.578760028 | 0.208079994 |
| 0.626399994 | 0.082769997 | 0.207259998 |
| 0.125220001 | 0.579670012 | 0.208320007 |
| 0.999260008 | 0.828809977 | 0.208269998 |
| 0.501240015 | 0.332949996 | 0.206499994 |
| 0.502860010 | 0.834129989 | 0.209360003 |

|             |             |             |
|-------------|-------------|-------------|
| 0.001630000 | 0.333139986 | 0.210759997 |
| 0.374909997 | 0.081900001 | 0.207870007 |
| 0.250809997 | 0.831459999 | 0.210199997 |
| 0.252730012 | 0.499139994 | 0.312489986 |
| 0.000790000 | 0.992670000 | 0.313549995 |
| 0.872990012 | 0.747730017 | 0.312940001 |
| 0.127780005 | 0.243929997 | 0.315239996 |
| 0.626299977 | 0.243750006 | 0.316520005 |
| 0.624719977 | 0.751540005 | 0.325430006 |
| 0.754549980 | 0.493180007 | 0.315800011 |
| 0.500880003 | 0.002150000 | 0.315600008 |
| 0.501619995 | 0.498279989 | 0.315250009 |
| 0.128539994 | 0.746609986 | 0.316339999 |
| 0.376230001 | 0.755209982 | 0.315840006 |
| 0.880599976 | 0.245299995 | 0.318910003 |
| 0.248999998 | 0.995720029 | 0.317550004 |
| 0.754740000 | 0.999759972 | 0.311109990 |
| 0.374639988 | 0.250569999 | 0.311789989 |
| 0.007220000 | 0.497579992 | 0.323599994 |

**CHO**

1.0

|               |              |               |
|---------------|--------------|---------------|
| 11.1216001511 | 0.0000000000 | 0.0000000000  |
| 0.0000000000  | 9.6316003799 | 0.0000000000  |
| 0.0000000000  | 0.0000000000 | 21.7964000702 |

| C | H | O | Pt |
|---|---|---|----|
| 8 | 1 | 8 | 64 |

Direct

|             |             |             |
|-------------|-------------|-------------|
| 0.575339973 | 0.113289997 | 0.383419991 |
| 0.867100000 | 0.076320000 | 0.380360007 |
| 0.346789986 | 0.284790009 | 0.413370013 |
| 0.861739993 | 0.413309991 | 0.381500006 |
| 0.752479970 | 0.742789984 | 0.383450001 |
| 0.451889992 | 0.634289980 | 0.384240001 |
| 0.140880004 | 0.082120001 | 0.378549993 |
| 0.074989997 | 0.631290019 | 0.387639999 |
| 0.383080006 | 0.197750002 | 0.441379994 |
| 0.583239973 | 0.110579997 | 0.437640011 |
| 0.860090017 | 0.071920000 | 0.434670001 |
| 0.854969978 | 0.416850001 | 0.435889989 |
| 0.753040016 | 0.740819991 | 0.437530011 |
| 0.456349999 | 0.637269974 | 0.438320011 |



|             |             |             |
|-------------|-------------|-------------|
| 0.296979994 | 0.383830011 | 0.435259998 |
| 0.144830003 | 0.088289998 | 0.433219999 |
| 0.079539999 | 0.632740021 | 0.441549987 |
| 0.000000000 | 0.000000000 | 0.000000000 |
| 0.000000000 | 0.500000000 | 0.000000000 |
| 0.125000000 | 0.250000000 | 0.000000000 |
| 0.125000000 | 0.750000000 | 0.000000000 |
| 0.250000000 | 0.000000000 | 0.000000000 |
| 0.250000000 | 0.500000000 | 0.000000000 |
| 0.375000000 | 0.250000000 | 0.000000000 |
| 0.375000000 | 0.750000000 | 0.000000000 |
| 0.500000000 | 0.000000000 | 0.000000000 |
| 0.500000000 | 0.500000000 | 0.000000000 |
| 0.625000000 | 0.250000000 | 0.000000000 |
| 0.625000000 | 0.750000000 | 0.000000000 |
| 0.750000000 | 0.000000000 | 0.000000000 |
| 0.750000000 | 0.500000000 | 0.000000000 |
| 0.875000000 | 0.250000000 | 0.000000000 |
| 0.875000000 | 0.750000000 | 0.000000000 |
| 0.000000000 | 0.166669995 | 0.103940003 |
| 0.000000000 | 0.666670024 | 0.103940003 |
| 0.125000000 | 0.416669995 | 0.103940003 |
| 0.125000000 | 0.916670024 | 0.103940003 |
| 0.250000000 | 0.166669995 | 0.103940003 |
| 0.250000000 | 0.666670024 | 0.103940003 |
| 0.375000000 | 0.416669995 | 0.103940003 |
| 0.375000000 | 0.916670024 | 0.103940003 |
| 0.500000000 | 0.166669995 | 0.103940003 |
| 0.500000000 | 0.666670024 | 0.103940003 |
| 0.625000000 | 0.416669995 | 0.103940003 |
| 0.625000000 | 0.916670024 | 0.103940003 |
| 0.750000000 | 0.166669995 | 0.103940003 |
| 0.750000000 | 0.666670024 | 0.103940003 |
| 0.875000000 | 0.416669995 | 0.103940003 |
| 0.875000000 | 0.916670024 | 0.103940003 |
| 0.125459999 | 0.079650000 | 0.207169995 |
| 0.750890017 | 0.833999991 | 0.206320003 |
| 0.251210004 | 0.328330010 | 0.206729993 |
| 0.748839974 | 0.330790013 | 0.207990006 |
| 0.626209974 | 0.581820011 | 0.208030000 |
| 0.376260012 | 0.582870007 | 0.206420004 |

|             |             |             |
|-------------|-------------|-------------|
| 0.878040016 | 0.086029999 | 0.207589999 |
| 0.875509977 | 0.581740022 | 0.208210006 |
| 0.624769986 | 0.083540000 | 0.207259998 |
| 0.122309998 | 0.581099987 | 0.206909999 |
| 0.999629974 | 0.833169997 | 0.209820002 |
| 0.498800009 | 0.333370000 | 0.209810004 |
| 0.501800001 | 0.833310008 | 0.209370002 |
| 0.999939978 | 0.334179997 | 0.209790006 |
| 0.376080006 | 0.082439996 | 0.209340006 |
| 0.250499994 | 0.829670012 | 0.209150001 |
| 0.250349998 | 0.494700015 | 0.307440013 |
| 0.003360000 | 0.997089982 | 0.320490003 |
| 0.874570012 | 0.750599980 | 0.314579993 |
| 0.128450006 | 0.245619997 | 0.313120008 |
| 0.620220006 | 0.249699995 | 0.316370010 |
| 0.628989995 | 0.751959980 | 0.315299988 |
| 0.748700023 | 0.493580014 | 0.313879997 |
| 0.500159979 | 0.998459995 | 0.317209989 |
| 0.500490010 | 0.500919998 | 0.316509992 |
| 0.127979994 | 0.745000005 | 0.316049993 |
| 0.376349986 | 0.749409974 | 0.316769987 |
| 0.876749992 | 0.249190003 | 0.318569988 |
| 0.253619999 | 0.993439972 | 0.314700007 |
| 0.754000008 | 0.003200000 | 0.310950011 |
| 0.372070014 | 0.254869998 | 0.323309988 |
| 0.003830000 | 0.498180002 | 0.322400004 |

**CHO-H**

1.0

|               |              |               |
|---------------|--------------|---------------|
| 11.1216001511 | 0.0000000000 | 0.0000000000  |
| 0.0000000000  | 9.6316003799 | 0.0000000000  |
| 0.0000000000  | 0.0000000000 | 21.7964000702 |

| C | H | O | Pt |
|---|---|---|----|
| 8 | 2 | 8 | 64 |

Direct

|             |             |             |
|-------------|-------------|-------------|
| 0.866869986 | 0.075669996 | 0.380219996 |
| 0.872340024 | 0.411190003 | 0.382019997 |
| 0.573889971 | 0.107660003 | 0.384730011 |
| 0.446969986 | 0.638840020 | 0.385369986 |
| 0.752030015 | 0.740930021 | 0.382840008 |
| 0.140110001 | 0.080849998 | 0.378479987 |
| 0.077179998 | 0.632350028 | 0.387930006 |

|             |             |             |
|-------------|-------------|-------------|
| 0.345889986 | 0.281260014 | 0.413320005 |
| 0.619099975 | 0.414869994 | 0.358350009 |
| 0.378270000 | 0.191000000 | 0.440580010 |
| 0.859799981 | 0.071649998 | 0.434549987 |
| 0.300339997 | 0.381960005 | 0.436080009 |
| 0.863699973 | 0.412010014 | 0.436390013 |
| 0.581309974 | 0.104199998 | 0.438890010 |
| 0.144280002 | 0.087229997 | 0.433160007 |
| 0.452730000 | 0.642979980 | 0.439350009 |
| 0.752430022 | 0.738979995 | 0.436969995 |
| 0.081960000 | 0.634249985 | 0.441810012 |
| 0.000000000 | 0.000000000 | 0.000000000 |
| 0.000000000 | 0.500000000 | 0.000000000 |
| 0.125000000 | 0.250000000 | 0.000000000 |
| 0.125000000 | 0.750000000 | 0.000000000 |
| 0.250000000 | 0.000000000 | 0.000000000 |
| 0.250000000 | 0.500000000 | 0.000000000 |
| 0.375000000 | 0.250000000 | 0.000000000 |
| 0.375000000 | 0.750000000 | 0.000000000 |
| 0.500000000 | 0.000000000 | 0.000000000 |
| 0.500000000 | 0.500000000 | 0.000000000 |
| 0.625000000 | 0.250000000 | 0.000000000 |
| 0.625000000 | 0.750000000 | 0.000000000 |
| 0.750000000 | 0.000000000 | 0.000000000 |
| 0.750000000 | 0.500000000 | 0.000000000 |
| 0.875000000 | 0.250000000 | 0.000000000 |
| 0.875000000 | 0.750000000 | 0.000000000 |
| 0.000000000 | 0.166669995 | 0.103940003 |
| 0.000000000 | 0.666670024 | 0.103940003 |
| 0.125000000 | 0.416669995 | 0.103940003 |
| 0.125000000 | 0.916670024 | 0.103940003 |
| 0.250000000 | 0.166669995 | 0.103940003 |
| 0.250000000 | 0.666670024 | 0.103940003 |
| 0.375000000 | 0.416669995 | 0.103940003 |
| 0.375000000 | 0.916670024 | 0.103940003 |
| 0.500000000 | 0.166669995 | 0.103940003 |
| 0.500000000 | 0.666670024 | 0.103940003 |
| 0.625000000 | 0.416669995 | 0.103940003 |
| 0.625000000 | 0.916670024 | 0.103940003 |
| 0.750000000 | 0.166669995 | 0.103940003 |
| 0.750000000 | 0.666670024 | 0.103940003 |

|             |             |             |
|-------------|-------------|-------------|
| 0.875000000 | 0.416669995 | 0.103940003 |
| 0.875000000 | 0.916670024 | 0.103940003 |
| 0.377260000 | 0.582140028 | 0.206619993 |
| 0.750909984 | 0.834559977 | 0.206080005 |
| 0.122040004 | 0.580799997 | 0.206760004 |
| 0.878220022 | 0.086319998 | 0.207369998 |
| 0.125550002 | 0.079429999 | 0.207029998 |
| 0.624880016 | 0.084990002 | 0.207519993 |
| 0.251480013 | 0.328040004 | 0.206569999 |
| 0.748799980 | 0.331580013 | 0.208580002 |
| 0.626529992 | 0.581629992 | 0.208299994 |
| 0.874989986 | 0.581139982 | 0.208519995 |
| 0.999539971 | 0.832889974 | 0.209680006 |
| 0.501999974 | 0.833670020 | 0.209230006 |
| 0.499300003 | 0.333660007 | 0.210130006 |
| 0.250710011 | 0.829180002 | 0.208979994 |
| 0.376249999 | 0.082439996 | 0.209340006 |
| 0.000050000 | 0.334100008 | 0.209680006 |
| 0.249929994 | 0.494329989 | 0.307000011 |
| 0.754599988 | 0.002900000 | 0.310640007 |
| 0.752049983 | 0.494670004 | 0.315800011 |
| 0.003520000 | 0.996349990 | 0.320470005 |
| 0.874979973 | 0.750609994 | 0.314269990 |
| 0.619960010 | 0.245869994 | 0.317730010 |
| 0.629100025 | 0.753430009 | 0.314570010 |
| 0.128389999 | 0.245269999 | 0.313039988 |
| 0.375310004 | 0.749979973 | 0.316410005 |
| 0.497680008 | 0.503319979 | 0.317880005 |
| 0.128000006 | 0.745119989 | 0.315869987 |
| 0.499760002 | 0.997489989 | 0.317119986 |
| 0.253259987 | 0.993510008 | 0.314449996 |
| 0.878189981 | 0.247999996 | 0.317999989 |
| 0.005290000 | 0.498129994 | 0.322880000 |
| 0.370510012 | 0.253580004 | 0.323029995 |

**HCHO**

1.0

|               |              |               |    |
|---------------|--------------|---------------|----|
| 11.1216001511 | 0.0000000000 | 0.0000000000  |    |
| 0.0000000000  | 9.6316003799 | 0.0000000000  |    |
| 0.0000000000  | 0.0000000000 | 21.7964000702 |    |
| C             | H            | O             | Pt |
| 8             | 2            | 8             | 64 |

Direct

|             |             |             |
|-------------|-------------|-------------|
| 0.878319979 | 0.072049998 | 0.378540009 |
| 0.858839989 | 0.410730004 | 0.381449997 |
| 0.546959996 | 0.134880006 | 0.383749992 |
| 0.487430006 | 0.656849980 | 0.379159987 |
| 0.757790029 | 0.751250029 | 0.386260003 |
| 0.208399996 | 0.134690002 | 0.383419991 |
| 0.047359999 | 0.653079987 | 0.385800004 |
| 0.321669996 | 0.426189989 | 0.453229994 |
| 0.401069999 | 0.369569987 | 0.435730010 |
| 0.306479990 | 0.430629998 | 0.503329992 |
| 0.876969993 | 0.063570000 | 0.433050007 |
| 0.249439999 | 0.484030008 | 0.419010013 |
| 0.853269994 | 0.415950000 | 0.435869992 |
| 0.540459991 | 0.142619997 | 0.437909991 |
| 0.217570007 | 0.145630002 | 0.437460005 |
| 0.484670013 | 0.649100006 | 0.434029996 |
| 0.763790011 | 0.751540005 | 0.440189987 |
| 0.037500001 | 0.662159979 | 0.439500004 |
| 0.000000000 | 0.000000000 | 0.000000000 |
| 0.000000000 | 0.500000000 | 0.000000000 |
| 0.125000000 | 0.250000000 | 0.000000000 |
| 0.125000000 | 0.750000000 | 0.000000000 |
| 0.250000000 | 0.000000000 | 0.000000000 |
| 0.250000000 | 0.500000000 | 0.000000000 |
| 0.375000000 | 0.250000000 | 0.000000000 |
| 0.375000000 | 0.750000000 | 0.000000000 |
| 0.500000000 | 0.000000000 | 0.000000000 |
| 0.500000000 | 0.500000000 | 0.000000000 |
| 0.625000000 | 0.250000000 | 0.000000000 |
| 0.625000000 | 0.750000000 | 0.000000000 |
| 0.750000000 | 0.000000000 | 0.000000000 |
| 0.750000000 | 0.500000000 | 0.000000000 |
| 0.875000000 | 0.250000000 | 0.000000000 |
| 0.875000000 | 0.750000000 | 0.000000000 |
| 0.000000000 | 0.166669995 | 0.103940003 |
| 0.000000000 | 0.666670024 | 0.103940003 |
| 0.125000000 | 0.416669995 | 0.103940003 |
| 0.125000000 | 0.916670024 | 0.103940003 |
| 0.250000000 | 0.166669995 | 0.103940003 |
| 0.250000000 | 0.666670024 | 0.103940003 |

|             |             |             |
|-------------|-------------|-------------|
| 0.375000000 | 0.416669995 | 0.103940003 |
| 0.375000000 | 0.916670024 | 0.103940003 |
| 0.500000000 | 0.166669995 | 0.103940003 |
| 0.500000000 | 0.666670024 | 0.103940003 |
| 0.625000000 | 0.416669995 | 0.103940003 |
| 0.625000000 | 0.916670024 | 0.103940003 |
| 0.750000000 | 0.166669995 | 0.103940003 |
| 0.750000000 | 0.666670024 | 0.103940003 |
| 0.875000000 | 0.416669995 | 0.103940003 |
| 0.875000000 | 0.916670024 | 0.103940003 |
| 0.374379992 | 0.584190011 | 0.207259998 |
| 0.748549998 | 0.832379997 | 0.207450002 |
| 0.124399997 | 0.581430018 | 0.208680004 |
| 0.876240015 | 0.085359998 | 0.207289994 |
| 0.124990001 | 0.080760002 | 0.207230002 |
| 0.625140011 | 0.082549997 | 0.207409993 |
| 0.248620003 | 0.332500011 | 0.206139997 |
| 0.750199974 | 0.330440015 | 0.208020002 |
| 0.626739979 | 0.583920002 | 0.208289996 |
| 0.876169980 | 0.581130028 | 0.207619995 |
| 0.998839974 | 0.831560016 | 0.208389997 |
| 0.501860023 | 0.832949996 | 0.210099995 |
| 0.501720011 | 0.335480005 | 0.206359997 |
| 0.249569997 | 0.831809998 | 0.210219994 |
| 0.375239998 | 0.078890003 | 0.206819996 |
| 0.001130000 | 0.333939999 | 0.210779995 |
| 0.252649993 | 0.495860010 | 0.312940001 |
| 0.752149999 | 0.002500000 | 0.312079996 |
| 0.749779999 | 0.492179990 | 0.313149989 |
| 0.000580000 | 0.996609986 | 0.313879997 |
| 0.871840000 | 0.749840021 | 0.314190000 |
| 0.621860027 | 0.249699995 | 0.316159993 |
| 0.625599980 | 0.751160026 | 0.321669996 |
| 0.129549995 | 0.246500000 | 0.315869987 |
| 0.374949992 | 0.752990007 | 0.316659987 |
| 0.501399994 | 0.498890013 | 0.314280003 |
| 0.128429994 | 0.749000013 | 0.316379994 |
| 0.500140011 | 0.000560000 | 0.317530006 |
| 0.250349998 | 0.995739996 | 0.318010002 |
| 0.878470004 | 0.247860000 | 0.319200009 |
| 0.003430000 | 0.499460012 | 0.321700007 |

|               |              |               |
|---------------|--------------|---------------|
| 0.376670003   | 0.252649993  | 0.307289988   |
| <b>HCHO-H</b> |              |               |
| 1.0           |              |               |
| 11.1216001511 | 0.0000000000 | 0.0000000000  |
| 0.0000000000  | 9.6316003799 | 0.0000000000  |
| 0.0000000000  | 0.0000000000 | 21.7964000702 |

|   |   |   |    |
|---|---|---|----|
| C | H | O | Pt |
| 8 | 3 | 8 | 64 |

Direct

|             |             |             |
|-------------|-------------|-------------|
| 0.861869991 | 0.070660003 | 0.382950008 |
| 0.804030001 | 0.389829993 | 0.387690008 |
| 0.446969986 | 0.631070018 | 0.384770006 |
| 0.534630001 | 0.137889996 | 0.383329988 |
| 0.140320003 | 0.004880000 | 0.388170004 |
| 0.749490023 | 0.741509974 | 0.384530008 |
| 0.050310001 | 0.645070016 | 0.385839999 |
| 0.308539987 | 0.344669998 | 0.475970000 |
| 0.077030003 | 0.367890000 | 0.364600003 |
| 0.400550008 | 0.387780011 | 0.481979996 |
| 0.282940000 | 0.254330009 | 0.505029976 |
| 0.851320028 | 0.065669999 | 0.437200010 |
| 0.801999986 | 0.394259989 | 0.441689998 |
| 0.238179997 | 0.393610001 | 0.438760012 |
| 0.450980008 | 0.631609976 | 0.439020008 |
| 0.525070012 | 0.148690000 | 0.437299997 |
| 0.145439997 | 0.009980000 | 0.442180008 |
| 0.750500023 | 0.738150001 | 0.438630015 |
| 0.045660000 | 0.650829971 | 0.439850003 |
| 0.000000000 | 0.000000000 | 0.000000000 |
| 0.000000000 | 0.500000000 | 0.000000000 |
| 0.125000000 | 0.250000000 | 0.000000000 |
| 0.125000000 | 0.750000000 | 0.000000000 |
| 0.250000000 | 0.000000000 | 0.000000000 |
| 0.250000000 | 0.500000000 | 0.000000000 |
| 0.375000000 | 0.250000000 | 0.000000000 |
| 0.375000000 | 0.750000000 | 0.000000000 |
| 0.500000000 | 0.000000000 | 0.000000000 |
| 0.500000000 | 0.500000000 | 0.000000000 |
| 0.625000000 | 0.250000000 | 0.000000000 |
| 0.625000000 | 0.750000000 | 0.000000000 |
| 0.750000000 | 0.000000000 | 0.000000000 |

|             |             |             |
|-------------|-------------|-------------|
| 0.750000000 | 0.500000000 | 0.000000000 |
| 0.875000000 | 0.250000000 | 0.000000000 |
| 0.875000000 | 0.750000000 | 0.000000000 |
| 0.000000000 | 0.166669995 | 0.103940003 |
| 0.000000000 | 0.666670024 | 0.103940003 |
| 0.125000000 | 0.416669995 | 0.103940003 |
| 0.125000000 | 0.916670024 | 0.103940003 |
| 0.250000000 | 0.166669995 | 0.103940003 |
| 0.250000000 | 0.666670024 | 0.103940003 |
| 0.375000000 | 0.416669995 | 0.103940003 |
| 0.375000000 | 0.916670024 | 0.103940003 |
| 0.500000000 | 0.166669995 | 0.103940003 |
| 0.500000000 | 0.666670024 | 0.103940003 |
| 0.625000000 | 0.416669995 | 0.103940003 |
| 0.625000000 | 0.916670024 | 0.103940003 |
| 0.750000000 | 0.166669995 | 0.103940003 |
| 0.750000000 | 0.666670024 | 0.103940003 |
| 0.875000000 | 0.416669995 | 0.103940003 |
| 0.875000000 | 0.916670024 | 0.103940003 |
| 0.248919994 | 0.330839992 | 0.204439998 |
| 0.751370013 | 0.834039986 | 0.206790000 |
| 0.377099991 | 0.584190011 | 0.206119999 |
| 0.501190007 | 0.335579991 | 0.207269996 |
| 0.373549998 | 0.077569999 | 0.207450002 |
| 0.878589988 | 0.085809998 | 0.209600002 |
| 0.625349998 | 0.082520001 | 0.207249999 |
| 0.123640001 | 0.081019998 | 0.207910001 |
| 0.122939996 | 0.582989991 | 0.206290007 |
| 0.627219975 | 0.583559990 | 0.209020004 |
| 0.749000013 | 0.330339998 | 0.208489999 |
| 0.875389993 | 0.582249999 | 0.209010005 |
| 0.998830020 | 0.834529996 | 0.209999993 |
| 0.501860023 | 0.833260000 | 0.210069999 |
| 0.249650002 | 0.829639971 | 0.209779993 |
| 0.996630013 | 0.335280001 | 0.210030004 |
| 0.370840013 | 0.250220001 | 0.308440000 |
| 0.252929986 | 0.496769994 | 0.307099998 |
| 0.752780020 | 0.002290000 | 0.311879992 |
| 0.744769990 | 0.494010001 | 0.314790010 |
| 0.003000000 | 0.004230000 | 0.324239999 |
| 0.496890008 | 0.499469995 | 0.317220002 |



|             |             |             |
|-------------|-------------|-------------|
| 0.872990012 | 0.749809980 | 0.315869987 |
| 0.126900002 | 0.252119988 | 0.310840011 |
| 0.627170026 | 0.753679991 | 0.316460013 |
| 0.616649985 | 0.248439997 | 0.315820009 |
| 0.497920007 | 0.998329997 | 0.317710012 |
| 0.375640005 | 0.749909997 | 0.317790002 |
| 0.250790000 | 0.998910010 | 0.316300005 |
| 0.127509996 | 0.746879995 | 0.315719992 |
| 0.870800018 | 0.251610011 | 0.323249996 |
| 0.003400000 | 0.501060009 | 0.320659995 |

**CH2OH-H**

1.0

|               |              |               |
|---------------|--------------|---------------|
| 11.1216001511 | 0.0000000000 | 0.0000000000  |
| 0.0000000000  | 9.6316003799 | 0.0000000000  |
| 0.0000000000  | 0.0000000000 | 21.7964000702 |

| C | H | O | Pt |
|---|---|---|----|
| 8 | 4 | 8 | 64 |

Direct

|             |             |             |
|-------------|-------------|-------------|
| 0.871460021 | 0.413729995 | 0.381540000 |
| 0.870289981 | 0.079650000 | 0.381339997 |
| 0.751519978 | 0.742139995 | 0.383210003 |
| 0.102030002 | 0.607060015 | 0.383789986 |
| 0.571129978 | 0.108779997 | 0.385470003 |
| 0.431479990 | 0.625909984 | 0.385320008 |
| 0.139909998 | 0.971210003 | 0.386469990 |
| 0.333640009 | 0.258789986 | 0.418110013 |
| 0.616500020 | 0.413960010 | 0.359090000 |
| 0.351680011 | 0.152079999 | 0.432779998 |
| 0.399749994 | 0.334589988 | 0.434839994 |
| 0.205300003 | 0.391490012 | 0.437590003 |
| 0.216260001 | 0.290840000 | 0.433050007 |
| 0.860870004 | 0.076410003 | 0.435609996 |
| 0.866289973 | 0.416009992 | 0.436089993 |
| 0.123130001 | 0.594319999 | 0.436980009 |
| 0.751529992 | 0.740419984 | 0.437390000 |
| 0.578390002 | 0.105870001 | 0.439599991 |
| 0.425399989 | 0.621209979 | 0.439480007 |
| 0.143150002 | 0.963829994 | 0.440490007 |
| 0.000000000 | 0.000000000 | 0.000000000 |
| 0.000000000 | 0.500000000 | 0.000000000 |
| 0.125000000 | 0.250000000 | 0.000000000 |

|             |             |             |
|-------------|-------------|-------------|
| 0.125000000 | 0.750000000 | 0.000000000 |
| 0.250000000 | 0.000000000 | 0.000000000 |
| 0.250000000 | 0.500000000 | 0.000000000 |
| 0.375000000 | 0.250000000 | 0.000000000 |
| 0.375000000 | 0.750000000 | 0.000000000 |
| 0.500000000 | 0.000000000 | 0.000000000 |
| 0.500000000 | 0.500000000 | 0.000000000 |
| 0.625000000 | 0.250000000 | 0.000000000 |
| 0.625000000 | 0.750000000 | 0.000000000 |
| 0.750000000 | 0.000000000 | 0.000000000 |
| 0.750000000 | 0.500000000 | 0.000000000 |
| 0.875000000 | 0.250000000 | 0.000000000 |
| 0.875000000 | 0.750000000 | 0.000000000 |
| 0.000000000 | 0.166669995 | 0.103940003 |
| 0.000000000 | 0.666670024 | 0.103940003 |
| 0.125000000 | 0.416669995 | 0.103940003 |
| 0.125000000 | 0.916670024 | 0.103940003 |
| 0.250000000 | 0.166669995 | 0.103940003 |
| 0.250000000 | 0.666670024 | 0.103940003 |
| 0.375000000 | 0.416669995 | 0.103940003 |
| 0.375000000 | 0.916670024 | 0.103940003 |
| 0.500000000 | 0.166669995 | 0.103940003 |
| 0.500000000 | 0.666670024 | 0.103940003 |
| 0.625000000 | 0.416669995 | 0.103940003 |
| 0.625000000 | 0.916670024 | 0.103940003 |
| 0.750000000 | 0.166669995 | 0.103940003 |
| 0.750000000 | 0.666670024 | 0.103940003 |
| 0.875000000 | 0.416669995 | 0.103940003 |
| 0.875000000 | 0.916670024 | 0.103940003 |
| 0.252640009 | 0.329459995 | 0.205369994 |
| 0.378380001 | 0.582279980 | 0.206389993 |
| 0.121629998 | 0.581889987 | 0.206349999 |
| 0.750689983 | 0.834969997 | 0.206410006 |
| 0.125400007 | 0.078809999 | 0.207059994 |
| 0.624490023 | 0.084299996 | 0.207660004 |
| 0.997860014 | 0.334349990 | 0.208049998 |
| 0.873749971 | 0.581489980 | 0.208619997 |
| 0.878740013 | 0.084490001 | 0.208230004 |
| 0.626640022 | 0.581459999 | 0.208739996 |
| 0.748269975 | 0.330659986 | 0.208959997 |
| 0.250990003 | 0.828719974 | 0.208949998 |

|             |             |             |
|-------------|-------------|-------------|
| 0.502099991 | 0.833280027 | 0.209450006 |
| 0.499469995 | 0.332470000 | 0.209989995 |
| 0.999300003 | 0.832300007 | 0.209930003 |
| 0.374449998 | 0.080159999 | 0.210020006 |
| 0.249410003 | 0.495759994 | 0.306360006 |
| 0.127560005 | 0.250349998 | 0.307469994 |
| 0.754790008 | 0.003530000 | 0.311690003 |
| 0.873820007 | 0.750850022 | 0.314689994 |
| 0.749629974 | 0.494060010 | 0.316190004 |
| 0.252389997 | 0.996580005 | 0.315930009 |
| 0.126570001 | 0.744449973 | 0.315970004 |
| 0.628170013 | 0.753769994 | 0.315210015 |
| 0.495629996 | 0.500609994 | 0.317919999 |
| 0.617349982 | 0.245379999 | 0.318199992 |
| 0.376839995 | 0.749539971 | 0.316740006 |
| 0.499170005 | 0.997510016 | 0.317409992 |
| 0.878390014 | 0.248260006 | 0.318280011 |
| 0.001980000 | 0.499139994 | 0.320510000 |
| 0.004800000 | 0.999620020 | 0.322120011 |
| 0.365550011 | 0.250640005 | 0.321790010 |

**CH3OH**

1.0

|               |              |               |
|---------------|--------------|---------------|
| 11.1216001511 | 0.0000000000 | 0.0000000000  |
| 0.0000000000  | 9.6316003799 | 0.0000000000  |
| 0.0000000000  | 0.0000000000 | 21.7964000702 |

| C | H | O | Pt |
|---|---|---|----|
| 8 | 4 | 8 | 64 |

Direct

|             |             |             |
|-------------|-------------|-------------|
| 0.863330007 | 0.412950009 | 0.380129993 |
| 0.867919981 | 0.077509999 | 0.381119996 |
| 0.753809988 | 0.741379976 | 0.384050012 |
| 0.092000000 | 0.609619975 | 0.384820014 |
| 0.545729995 | 0.133520007 | 0.384059995 |
| 0.439300001 | 0.620809972 | 0.384909987 |
| 0.138429999 | 0.956080019 | 0.385520011 |
| 0.236939996 | 0.277929991 | 0.455020010 |
| 0.283140004 | 0.374929994 | 0.442690015 |
| 0.294149995 | 0.188569993 | 0.444339991 |
| 0.214440003 | 0.277359992 | 0.504109979 |
| 0.068559997 | 0.330269992 | 0.433099985 |
| 0.127140000 | 0.260430008 | 0.419900000 |

|             |             |             |
|-------------|-------------|-------------|
| 0.859040022 | 0.075250000 | 0.435499996 |
| 0.866789997 | 0.415529996 | 0.434980005 |
| 0.105460003 | 0.597639978 | 0.438450009 |
| 0.756129980 | 0.739350021 | 0.438190013 |
| 0.539349973 | 0.141320005 | 0.438160002 |
| 0.435409993 | 0.617810011 | 0.439119995 |
| 0.141259998 | 0.945540011 | 0.439579993 |
| 0.000000000 | 0.000000000 | 0.000000000 |
| 0.000000000 | 0.500000000 | 0.000000000 |
| 0.125000000 | 0.250000000 | 0.000000000 |
| 0.125000000 | 0.750000000 | 0.000000000 |
| 0.250000000 | 0.000000000 | 0.000000000 |
| 0.250000000 | 0.500000000 | 0.000000000 |
| 0.375000000 | 0.250000000 | 0.000000000 |
| 0.375000000 | 0.750000000 | 0.000000000 |
| 0.500000000 | 0.000000000 | 0.000000000 |
| 0.500000000 | 0.500000000 | 0.000000000 |
| 0.625000000 | 0.250000000 | 0.000000000 |
| 0.625000000 | 0.750000000 | 0.000000000 |
| 0.750000000 | 0.000000000 | 0.000000000 |
| 0.750000000 | 0.500000000 | 0.000000000 |
| 0.875000000 | 0.250000000 | 0.000000000 |
| 0.875000000 | 0.750000000 | 0.000000000 |
| 0.000000000 | 0.166669995 | 0.103940003 |
| 0.000000000 | 0.666670024 | 0.103940003 |
| 0.125000000 | 0.416669995 | 0.103940003 |
| 0.125000000 | 0.916670024 | 0.103940003 |
| 0.250000000 | 0.166669995 | 0.103940003 |
| 0.250000000 | 0.666670024 | 0.103940003 |
| 0.375000000 | 0.416669995 | 0.103940003 |
| 0.375000000 | 0.916670024 | 0.103940003 |
| 0.500000000 | 0.166669995 | 0.103940003 |
| 0.500000000 | 0.666670024 | 0.103940003 |
| 0.625000000 | 0.416669995 | 0.103940003 |
| 0.625000000 | 0.916670024 | 0.103940003 |
| 0.750000000 | 0.166669995 | 0.103940003 |
| 0.750000000 | 0.666670024 | 0.103940003 |
| 0.875000000 | 0.416669995 | 0.103940003 |
| 0.875000000 | 0.916670024 | 0.103940003 |
| 0.249210000 | 0.330379993 | 0.205090001 |
| 0.377939999 | 0.583589971 | 0.206119999 |

|             |             |             |
|-------------|-------------|-------------|
| 0.122740000 | 0.582729995 | 0.206919998 |
| 0.751169980 | 0.834259987 | 0.206589997 |
| 0.125489995 | 0.080820002 | 0.208629996 |
| 0.625270009 | 0.082340002 | 0.207310006 |
| 0.999450028 | 0.333689988 | 0.209230006 |
| 0.874750018 | 0.581889987 | 0.207920000 |
| 0.879490018 | 0.083760001 | 0.208480000 |
| 0.627399981 | 0.582629979 | 0.209000006 |
| 0.749809980 | 0.329869986 | 0.208379999 |
| 0.250490010 | 0.828679979 | 0.209470004 |
| 0.502569973 | 0.832589984 | 0.210189998 |
| 0.501659989 | 0.334479988 | 0.207249999 |
| 0.000250000 | 0.832889974 | 0.209849998 |
| 0.373970002 | 0.076760001 | 0.207870007 |
| 0.253149986 | 0.494340003 | 0.307429999 |
| 0.130840003 | 0.250039995 | 0.312929988 |
| 0.754209995 | 0.002670000 | 0.311870009 |
| 0.873899996 | 0.749960005 | 0.314390004 |
| 0.747789979 | 0.492269993 | 0.315239996 |
| 0.254770011 | 0.995769978 | 0.317319989 |
| 0.128769994 | 0.743309975 | 0.317039996 |
| 0.628970027 | 0.751709998 | 0.316929996 |
| 0.499790013 | 0.496780008 | 0.317169994 |
| 0.620360017 | 0.248809993 | 0.316399992 |
| 0.379629999 | 0.747399986 | 0.317570001 |
| 0.500810027 | 0.997590005 | 0.317939997 |
| 0.877489984 | 0.247620001 | 0.318179995 |
| 0.002530000 | 0.499330014 | 0.318540007 |
| 0.004520000 | 0.998809993 | 0.321839988 |
| 0.373349994 | 0.248190001 | 0.308739990 |

**CHOH-H**

1.0

|               |              |               |
|---------------|--------------|---------------|
| 11.1216001511 | 0.0000000000 | 0.0000000000  |
| 0.0000000000  | 9.6316003799 | 0.0000000000  |
| 0.0000000000  | 0.0000000000 | 21.7964000702 |

| C | H | O | Pt |
|---|---|---|----|
| 8 | 3 | 8 | 64 |

Direct

|             |             |             |
|-------------|-------------|-------------|
| 0.871779978 | 0.078860000 | 0.381359994 |
| 0.871060014 | 0.412490010 | 0.382090002 |
| 0.437359989 | 0.632979989 | 0.385690004 |

|             |             |             |
|-------------|-------------|-------------|
| 0.578299999 | 0.103370003 | 0.384790003 |
| 0.141609997 | 0.981890023 | 0.386480004 |
| 0.751860023 | 0.741540015 | 0.383240014 |
| 0.086719997 | 0.622089982 | 0.386370003 |
| 0.339709997 | 0.251470000 | 0.409179986 |
| 0.257059991 | 0.423079997 | 0.415190011 |
| 0.618460000 | 0.414790004 | 0.359219998 |
| 0.369439989 | 0.164590001 | 0.438329995 |
| 0.862469971 | 0.075680003 | 0.435649991 |
| 0.864610016 | 0.413709998 | 0.436610013 |
| 0.285589993 | 0.344969988 | 0.441830009 |
| 0.434720010 | 0.633369982 | 0.439949989 |
| 0.584819973 | 0.099639997 | 0.439029992 |
| 0.145549998 | 0.980310023 | 0.440649986 |
| 0.751709998 | 0.739939988 | 0.437400013 |
| 0.099789999 | 0.619390011 | 0.440200001 |
| 0.000000000 | 0.000000000 | 0.000000000 |
| 0.000000000 | 0.500000000 | 0.000000000 |
| 0.125000000 | 0.250000000 | 0.000000000 |
| 0.125000000 | 0.750000000 | 0.000000000 |
| 0.250000000 | 0.000000000 | 0.000000000 |
| 0.250000000 | 0.500000000 | 0.000000000 |
| 0.375000000 | 0.250000000 | 0.000000000 |
| 0.375000000 | 0.750000000 | 0.000000000 |
| 0.500000000 | 0.000000000 | 0.000000000 |
| 0.500000000 | 0.500000000 | 0.000000000 |
| 0.625000000 | 0.250000000 | 0.000000000 |
| 0.625000000 | 0.750000000 | 0.000000000 |
| 0.750000000 | 0.000000000 | 0.000000000 |
| 0.750000000 | 0.500000000 | 0.000000000 |
| 0.875000000 | 0.250000000 | 0.000000000 |
| 0.875000000 | 0.750000000 | 0.000000000 |
| 0.000000000 | 0.166669995 | 0.103940003 |
| 0.000000000 | 0.666670024 | 0.103940003 |
| 0.125000000 | 0.416669995 | 0.103940003 |
| 0.125000000 | 0.916670024 | 0.103940003 |
| 0.250000000 | 0.166669995 | 0.103940003 |
| 0.250000000 | 0.666670024 | 0.103940003 |
| 0.375000000 | 0.416669995 | 0.103940003 |
| 0.375000000 | 0.916670024 | 0.103940003 |
| 0.500000000 | 0.166669995 | 0.103940003 |

|             |             |             |
|-------------|-------------|-------------|
| 0.500000000 | 0.666670024 | 0.103940003 |
| 0.625000000 | 0.416669995 | 0.103940003 |
| 0.625000000 | 0.916670024 | 0.103940003 |
| 0.750000000 | 0.166669995 | 0.103940003 |
| 0.750000000 | 0.666670024 | 0.103940003 |
| 0.875000000 | 0.416669995 | 0.103940003 |
| 0.875000000 | 0.916670024 | 0.103940003 |
| 0.253089994 | 0.330000013 | 0.205720007 |
| 0.750769973 | 0.834590018 | 0.206340000 |
| 0.378259987 | 0.582120001 | 0.206640005 |
| 0.498499990 | 0.331490010 | 0.211359993 |
| 0.375019997 | 0.080920003 | 0.210099995 |
| 0.878830016 | 0.084940001 | 0.208179995 |
| 0.625109971 | 0.083980002 | 0.207660004 |
| 0.125389993 | 0.078740001 | 0.206709996 |
| 0.121459998 | 0.581990004 | 0.206310004 |
| 0.626060009 | 0.580460012 | 0.208759993 |
| 0.747770011 | 0.330890000 | 0.208759993 |
| 0.873600006 | 0.581709981 | 0.208739996 |
| 0.999170005 | 0.832599998 | 0.209840000 |
| 0.502290010 | 0.832939982 | 0.209150001 |
| 0.251190007 | 0.829119980 | 0.208849996 |
| 0.997380018 | 0.335330009 | 0.208090007 |
| 0.368490010 | 0.251679987 | 0.322829992 |
| 0.248879999 | 0.496950001 | 0.306760013 |
| 0.755930007 | 0.002720000 | 0.311800003 |
| 0.750649989 | 0.493900001 | 0.316300005 |
| 0.005880000 | 0.000000000 | 0.322169989 |
| 0.496619999 | 0.501760006 | 0.319110006 |
| 0.874059975 | 0.750699997 | 0.314639986 |
| 0.126650006 | 0.251399994 | 0.306089997 |
| 0.628740013 | 0.752669990 | 0.315039992 |
| 0.620310009 | 0.244560003 | 0.318430007 |
| 0.500970006 | 0.996200025 | 0.317030013 |
| 0.376580000 | 0.749620020 | 0.316190004 |
| 0.252880007 | 0.996230006 | 0.315230012 |
| 0.126980007 | 0.744840026 | 0.315409988 |
| 0.878939986 | 0.248300001 | 0.318370014 |
| 0.003060000 | 0.499300003 | 0.322279990 |

**CH-H2O**

1.0

|               |              |               |
|---------------|--------------|---------------|
| 11.1216001511 | 0.0000000000 | 0.0000000000  |
| 0.0000000000  | 9.6316003799 | 0.0000000000  |
| 0.0000000000  | 0.0000000000 | 21.7964000702 |

|   |   |   |    |
|---|---|---|----|
| C | H | O | Pt |
| 8 | 3 | 8 | 64 |

Direct

|             |             |             |
|-------------|-------------|-------------|
| 0.865320027 | 0.077339999 | 0.381909996 |
| 0.855660021 | 0.412869990 | 0.382120013 |
| 0.446920007 | 0.628359973 | 0.384499997 |
| 0.547379971 | 0.131679997 | 0.384389997 |
| 0.140200004 | 0.974889994 | 0.387100011 |
| 0.752229989 | 0.744319975 | 0.383870006 |
| 0.069660001 | 0.629270017 | 0.387360007 |
| 0.250120014 | 0.331110001 | 0.367610008 |
| 0.388520002 | 0.437090009 | 0.496419996 |
| 0.415259987 | 0.279390007 | 0.494879991 |
| 0.257699996 | 0.334170014 | 0.418599993 |
| 0.854669988 | 0.073100001 | 0.436129987 |
| 0.850920022 | 0.418419987 | 0.436529994 |
| 0.349559993 | 0.346469998 | 0.494120002 |
| 0.446570009 | 0.627179980 | 0.438919991 |
| 0.543550014 | 0.137600005 | 0.438710004 |
| 0.144010007 | 0.969190001 | 0.441109985 |
| 0.753989995 | 0.741829991 | 0.437970012 |
| 0.074239999 | 0.631030023 | 0.441339999 |
| 0.000000000 | 0.000000000 | 0.000000000 |
| 0.000000000 | 0.500000000 | 0.000000000 |
| 0.125000000 | 0.250000000 | 0.000000000 |
| 0.125000000 | 0.750000000 | 0.000000000 |
| 0.250000000 | 0.000000000 | 0.000000000 |
| 0.250000000 | 0.500000000 | 0.000000000 |
| 0.375000000 | 0.250000000 | 0.000000000 |
| 0.375000000 | 0.750000000 | 0.000000000 |
| 0.500000000 | 0.000000000 | 0.000000000 |
| 0.500000000 | 0.500000000 | 0.000000000 |
| 0.625000000 | 0.250000000 | 0.000000000 |
| 0.625000000 | 0.750000000 | 0.000000000 |
| 0.750000000 | 0.000000000 | 0.000000000 |
| 0.750000000 | 0.500000000 | 0.000000000 |
| 0.875000000 | 0.250000000 | 0.000000000 |
| 0.875000000 | 0.750000000 | 0.000000000 |



|             |             |             |
|-------------|-------------|-------------|
| 0.000000000 | 0.166669995 | 0.103940003 |
| 0.000000000 | 0.666670024 | 0.103940003 |
| 0.125000000 | 0.416669995 | 0.103940003 |
| 0.125000000 | 0.916670024 | 0.103940003 |
| 0.250000000 | 0.166669995 | 0.103940003 |
| 0.250000000 | 0.666670024 | 0.103940003 |
| 0.375000000 | 0.416669995 | 0.103940003 |
| 0.375000000 | 0.916670024 | 0.103940003 |
| 0.500000000 | 0.166669995 | 0.103940003 |
| 0.500000000 | 0.666670024 | 0.103940003 |
| 0.625000000 | 0.416669995 | 0.103940003 |
| 0.625000000 | 0.916670024 | 0.103940003 |
| 0.750000000 | 0.166669995 | 0.103940003 |
| 0.750000000 | 0.666670024 | 0.103940003 |
| 0.875000000 | 0.416669995 | 0.103940003 |
| 0.875000000 | 0.916670024 | 0.103940003 |
| 0.249760002 | 0.330769986 | 0.205280006 |
| 0.750450015 | 0.833980024 | 0.206420004 |
| 0.375499994 | 0.582449973 | 0.207200006 |
| 0.499839991 | 0.333389997 | 0.208539993 |
| 0.373869985 | 0.079219997 | 0.208649993 |
| 0.879260004 | 0.084799998 | 0.208729997 |
| 0.625060022 | 0.082580000 | 0.207220003 |
| 0.124499999 | 0.081110001 | 0.208320007 |
| 0.123389997 | 0.581210017 | 0.207790002 |
| 0.626049995 | 0.582040012 | 0.208210006 |
| 0.749210000 | 0.329930007 | 0.208389997 |
| 0.874989986 | 0.581990004 | 0.207690001 |
| 0.999650002 | 0.832989991 | 0.209739998 |
| 0.501359999 | 0.832719982 | 0.209840000 |
| 0.250000000 | 0.829159975 | 0.209390000 |
| 0.998719990 | 0.334479988 | 0.210069999 |
| 0.374359995 | 0.247020006 | 0.314249992 |
| 0.251419991 | 0.496230006 | 0.312189996 |
| 0.754199982 | 0.003110000 | 0.311459988 |
| 0.747430027 | 0.493180007 | 0.313639998 |
| 0.004100000 | 0.000050000 | 0.323089987 |
| 0.501489997 | 0.499879986 | 0.317000002 |
| 0.872539997 | 0.751420021 | 0.314190000 |
| 0.125799999 | 0.249860004 | 0.313789994 |
| 0.628189981 | 0.752690017 | 0.316329986 |

|             |             |             |
|-------------|-------------|-------------|
| 0.620660007 | 0.248870000 | 0.316599995 |
| 0.500980020 | 0.998019993 | 0.317669988 |
| 0.378300011 | 0.748730004 | 0.317350000 |
| 0.252530009 | 0.993449986 | 0.316109985 |
| 0.126829997 | 0.743659973 | 0.316080004 |
| 0.876200020 | 0.248950005 | 0.320069999 |
| 0.999010026 | 0.501259983 | 0.321449995 |

**CH**

1.0

|               |              |               |
|---------------|--------------|---------------|
| 11.1216001511 | 0.0000000000 | 0.0000000000  |
| 0.0000000000  | 9.6316003799 | 0.0000000000  |
| 0.0000000000  | 0.0000000000 | 21.7964000702 |

| C | H | O | Pt |
|---|---|---|----|
| 8 | 1 | 7 | 64 |

Direct

|             |             |             |
|-------------|-------------|-------------|
| 0.866110027 | 0.077030003 | 0.381810009 |
| 0.855459988 | 0.411949992 | 0.382110000 |
| 0.752610028 | 0.744430006 | 0.383859992 |
| 0.552540004 | 0.128340006 | 0.384710014 |
| 0.447490007 | 0.627979994 | 0.384700000 |
| 0.140770003 | 0.974940002 | 0.387080014 |
| 0.070060000 | 0.628859997 | 0.387169987 |
| 0.250039995 | 0.331019998 | 0.368189991 |
| 0.248590007 | 0.333860010 | 0.418660015 |
| 0.855620027 | 0.072839998 | 0.436030000 |
| 0.851580024 | 0.417490005 | 0.436509997 |
| 0.754490018 | 0.742340028 | 0.437929988 |
| 0.552540004 | 0.132190004 | 0.438859999 |
| 0.447270006 | 0.626990020 | 0.438910007 |
| 0.074689999 | 0.630100012 | 0.441170007 |
| 0.144309998 | 0.969879985 | 0.441119999 |
| 0.000000000 | 0.000000000 | 0.000000000 |
| 0.000000000 | 0.500000000 | 0.000000000 |
| 0.125000000 | 0.250000000 | 0.000000000 |
| 0.125000000 | 0.750000000 | 0.000000000 |
| 0.250000000 | 0.000000000 | 0.000000000 |
| 0.250000000 | 0.500000000 | 0.000000000 |
| 0.375000000 | 0.250000000 | 0.000000000 |
| 0.375000000 | 0.750000000 | 0.000000000 |
| 0.500000000 | 0.000000000 | 0.000000000 |
| 0.500000000 | 0.500000000 | 0.000000000 |

|             |             |             |
|-------------|-------------|-------------|
| 0.625000000 | 0.250000000 | 0.000000000 |
| 0.625000000 | 0.750000000 | 0.000000000 |
| 0.750000000 | 0.000000000 | 0.000000000 |
| 0.750000000 | 0.500000000 | 0.000000000 |
| 0.875000000 | 0.250000000 | 0.000000000 |
| 0.875000000 | 0.750000000 | 0.000000000 |
| 0.000000000 | 0.166669995 | 0.103940003 |
| 0.000000000 | 0.666670024 | 0.103940003 |
| 0.125000000 | 0.416669995 | 0.103940003 |
| 0.125000000 | 0.916670024 | 0.103940003 |
| 0.250000000 | 0.166669995 | 0.103940003 |
| 0.250000000 | 0.666670024 | 0.103940003 |
| 0.375000000 | 0.416669995 | 0.103940003 |
| 0.375000000 | 0.916670024 | 0.103940003 |
| 0.500000000 | 0.166669995 | 0.103940003 |
| 0.500000000 | 0.666670024 | 0.103940003 |
| 0.625000000 | 0.416669995 | 0.103940003 |
| 0.625000000 | 0.916670024 | 0.103940003 |
| 0.750000000 | 0.166669995 | 0.103940003 |
| 0.750000000 | 0.666670024 | 0.103940003 |
| 0.875000000 | 0.416669995 | 0.103940003 |
| 0.875000000 | 0.916670024 | 0.103940003 |
| 0.250220001 | 0.330790013 | 0.205459997 |
| 0.123860002 | 0.581110001 | 0.207870007 |
| 0.750699997 | 0.833729982 | 0.206389993 |
| 0.375479996 | 0.582379997 | 0.207259998 |
| 0.124779999 | 0.081150003 | 0.208309993 |
| 0.625230014 | 0.082410000 | 0.207130000 |
| 0.999040008 | 0.334289998 | 0.210040003 |
| 0.879530013 | 0.084670000 | 0.208639994 |
| 0.749400020 | 0.329829991 | 0.208279997 |
| 0.875280023 | 0.581759989 | 0.207640007 |
| 0.626179993 | 0.581839979 | 0.208179995 |
| 0.250200003 | 0.829320014 | 0.209380001 |
| 0.501510024 | 0.832589984 | 0.209739998 |
| 0.999899983 | 0.832889974 | 0.209690005 |
| 0.374049991 | 0.079590000 | 0.208869994 |
| 0.499749988 | 0.333090007 | 0.208719999 |
| 0.126519993 | 0.249709994 | 0.313529998 |
| 0.251839995 | 0.495999992 | 0.312599987 |
| 0.754859984 | 0.002740000 | 0.311309993 |

|             |             |             |
|-------------|-------------|-------------|
| 0.872979999 | 0.751039982 | 0.314130008 |
| 0.628589988 | 0.752399981 | 0.316260010 |
| 0.253320009 | 0.993359983 | 0.316240013 |
| 0.127149999 | 0.743740022 | 0.316049993 |
| 0.747879982 | 0.492859989 | 0.313670009 |
| 0.378670007 | 0.748480022 | 0.317209989 |
| 0.501529992 | 0.997829974 | 0.317380011 |
| 0.621169984 | 0.248559996 | 0.316320002 |
| 0.876829982 | 0.248610005 | 0.319940001 |
| 0.501890004 | 0.499669999 | 0.316769987 |
| 0.004780000 | 0.999800026 | 0.322990000 |
| 0.999480009 | 0.501049995 | 0.321179986 |
| 0.375000000 | 0.246900007 | 0.315490007 |

**CH-H**

1.0

|               |              |               |
|---------------|--------------|---------------|
| 11.1216001511 | 0.0000000000 | 0.0000000000  |
| 0.0000000000  | 9.6316003799 | 0.0000000000  |
| 0.0000000000  | 0.0000000000 | 21.7964000702 |

| C | H | O | Pt |
|---|---|---|----|
| 8 | 2 | 7 | 64 |

Direct

|             |             |             |
|-------------|-------------|-------------|
| 0.865890026 | 0.076920003 | 0.381689996 |
| 0.868709981 | 0.411330014 | 0.382209986 |
| 0.751860023 | 0.743239999 | 0.383289993 |
| 0.551029980 | 0.120180003 | 0.385939986 |
| 0.442009985 | 0.633239985 | 0.385670006 |
| 0.141430005 | 0.979130030 | 0.387320012 |
| 0.072430000 | 0.631579995 | 0.387419999 |
| 0.249990001 | 0.330500007 | 0.367839992 |
| 0.618200004 | 0.413500011 | 0.358880013 |
| 0.248779997 | 0.332839996 | 0.418309987 |
| 0.854719996 | 0.073330000 | 0.435889989 |
| 0.861869991 | 0.413659990 | 0.436670005 |
| 0.753019989 | 0.740930021 | 0.437409997 |
| 0.549749970 | 0.123539999 | 0.440039992 |
| 0.442690015 | 0.633019984 | 0.439830005 |
| 0.077220000 | 0.633729994 | 0.441399992 |
| 0.145620003 | 0.975719988 | 0.441370010 |
| 0.000000000 | 0.000000000 | 0.000000000 |
| 0.000000000 | 0.500000000 | 0.000000000 |
| 0.125000000 | 0.250000000 | 0.000000000 |

|             |             |             |
|-------------|-------------|-------------|
| 0.125000000 | 0.750000000 | 0.000000000 |
| 0.250000000 | 0.000000000 | 0.000000000 |
| 0.250000000 | 0.500000000 | 0.000000000 |
| 0.375000000 | 0.250000000 | 0.000000000 |
| 0.375000000 | 0.750000000 | 0.000000000 |
| 0.500000000 | 0.000000000 | 0.000000000 |
| 0.500000000 | 0.500000000 | 0.000000000 |
| 0.625000000 | 0.250000000 | 0.000000000 |
| 0.625000000 | 0.750000000 | 0.000000000 |
| 0.750000000 | 0.000000000 | 0.000000000 |
| 0.750000000 | 0.500000000 | 0.000000000 |
| 0.875000000 | 0.250000000 | 0.000000000 |
| 0.875000000 | 0.750000000 | 0.000000000 |
| 0.000000000 | 0.166669995 | 0.103940003 |
| 0.000000000 | 0.666670024 | 0.103940003 |
| 0.125000000 | 0.416669995 | 0.103940003 |
| 0.125000000 | 0.916670024 | 0.103940003 |
| 0.250000000 | 0.166669995 | 0.103940003 |
| 0.250000000 | 0.666670024 | 0.103940003 |
| 0.375000000 | 0.416669995 | 0.103940003 |
| 0.375000000 | 0.916670024 | 0.103940003 |
| 0.500000000 | 0.166669995 | 0.103940003 |
| 0.500000000 | 0.666670024 | 0.103940003 |
| 0.625000000 | 0.416669995 | 0.103940003 |
| 0.625000000 | 0.916670024 | 0.103940003 |
| 0.750000000 | 0.166669995 | 0.103940003 |
| 0.750000000 | 0.666670024 | 0.103940003 |
| 0.875000000 | 0.416669995 | 0.103940003 |
| 0.875000000 | 0.916670024 | 0.103940003 |
| 0.250279993 | 0.330720007 | 0.205200002 |
| 0.123439997 | 0.580619991 | 0.207810000 |
| 0.750790000 | 0.834330022 | 0.206149995 |
| 0.376260012 | 0.581520021 | 0.207509995 |
| 0.124609999 | 0.081009999 | 0.208140001 |
| 0.625280023 | 0.083920002 | 0.207420006 |
| 0.998889983 | 0.334349990 | 0.209849998 |
| 0.879599988 | 0.084840000 | 0.208340004 |
| 0.749140024 | 0.330440015 | 0.208949998 |
| 0.874520004 | 0.581130028 | 0.208100006 |
| 0.626359999 | 0.581510007 | 0.208350003 |
| 0.250299990 | 0.828920007 | 0.209150001 |

|             |             |             |
|-------------|-------------|-------------|
| 0.501649976 | 0.832809985 | 0.209460005 |
| 0.999740005 | 0.832589984 | 0.209519997 |
| 0.374009997 | 0.079449996 | 0.208660007 |
| 0.500310004 | 0.333169997 | 0.209000006 |
| 0.126320004 | 0.249579996 | 0.313089997 |
| 0.251109987 | 0.495730013 | 0.312420011 |
| 0.755339980 | 0.002750000 | 0.310900003 |
| 0.873449981 | 0.751349986 | 0.314040005 |
| 0.628790021 | 0.753880024 | 0.315299988 |
| 0.252629995 | 0.993929982 | 0.315890014 |
| 0.126980007 | 0.744210005 | 0.315510005 |
| 0.750810027 | 0.493990004 | 0.315549999 |
| 0.377180010 | 0.749360025 | 0.316680014 |
| 0.500790000 | 0.996569991 | 0.316830009 |
| 0.620509982 | 0.244739994 | 0.318269998 |
| 0.878080010 | 0.247390002 | 0.319110006 |
| 0.499280006 | 0.502860010 | 0.317930013 |
| 0.004900000 | 0.999080002 | 0.323390007 |
| 0.000580000 | 0.501389980 | 0.321980000 |
| 0.373589993 | 0.245989993 | 0.314529985 |

## CH2

1.0

|               |              |               |
|---------------|--------------|---------------|
| 11.1216001511 | 0.0000000000 | 0.0000000000  |
| 0.0000000000  | 9.6316003799 | 0.0000000000  |
| 0.0000000000  | 0.0000000000 | 21.7964000702 |

| C | H | O | Pt |
|---|---|---|----|
| 8 | 2 | 7 | 64 |

Direct

|             |             |             |
|-------------|-------------|-------------|
| 0.864090025 | 0.078019999 | 0.381150007 |
| 0.859480023 | 0.412889987 | 0.381240010 |
| 0.762889981 | 0.748499990 | 0.386570007 |
| 0.549170017 | 0.134240001 | 0.384350002 |
| 0.489259988 | 0.658070028 | 0.378989995 |
| 0.138349995 | 0.984879971 | 0.387620002 |
| 0.076590002 | 0.624310017 | 0.387149990 |
| 0.306419998 | 0.369370013 | 0.389030010 |
| 0.376089990 | 0.412770003 | 0.419090003 |
| 0.231199995 | 0.324000001 | 0.414950013 |
| 0.854960024 | 0.074139997 | 0.435440004 |
| 0.853039980 | 0.417439997 | 0.435649991 |
| 0.769370019 | 0.747160017 | 0.440470010 |

|             |             |             |
|-------------|-------------|-------------|
| 0.549430013 | 0.137689993 | 0.438540012 |
| 0.483550012 | 0.646160007 | 0.433440000 |
| 0.080159999 | 0.627430022 | 0.441159993 |
| 0.140090004 | 0.983669996 | 0.441689998 |
| 0.000000000 | 0.000000000 | 0.000000000 |
| 0.000000000 | 0.500000000 | 0.000000000 |
| 0.125000000 | 0.250000000 | 0.000000000 |
| 0.125000000 | 0.750000000 | 0.000000000 |
| 0.250000000 | 0.000000000 | 0.000000000 |
| 0.250000000 | 0.500000000 | 0.000000000 |
| 0.375000000 | 0.250000000 | 0.000000000 |
| 0.375000000 | 0.750000000 | 0.000000000 |
| 0.500000000 | 0.000000000 | 0.000000000 |
| 0.500000000 | 0.500000000 | 0.000000000 |
| 0.625000000 | 0.250000000 | 0.000000000 |
| 0.625000000 | 0.750000000 | 0.000000000 |
| 0.750000000 | 0.000000000 | 0.000000000 |
| 0.750000000 | 0.500000000 | 0.000000000 |
| 0.875000000 | 0.250000000 | 0.000000000 |
| 0.875000000 | 0.750000000 | 0.000000000 |
| 0.000000000 | 0.166669995 | 0.103940003 |
| 0.000000000 | 0.666670024 | 0.103940003 |
| 0.125000000 | 0.416669995 | 0.103940003 |
| 0.125000000 | 0.916670024 | 0.103940003 |
| 0.250000000 | 0.166669995 | 0.103940003 |
| 0.250000000 | 0.666670024 | 0.103940003 |
| 0.375000000 | 0.416669995 | 0.103940003 |
| 0.375000000 | 0.916670024 | 0.103940003 |
| 0.500000000 | 0.166669995 | 0.103940003 |
| 0.500000000 | 0.666670024 | 0.103940003 |
| 0.625000000 | 0.416669995 | 0.103940003 |
| 0.625000000 | 0.916670024 | 0.103940003 |
| 0.750000000 | 0.166669995 | 0.103940003 |
| 0.750000000 | 0.666670024 | 0.103940003 |
| 0.875000000 | 0.416669995 | 0.103940003 |
| 0.875000000 | 0.916670024 | 0.103940003 |
| 0.251190007 | 0.331669986 | 0.206070006 |
| 0.125359997 | 0.578930020 | 0.208550006 |
| 0.748749971 | 0.832539976 | 0.207509995 |
| 0.374790013 | 0.583220005 | 0.207580000 |
| 0.124600001 | 0.077370003 | 0.206579998 |

|             |             |             |
|-------------|-------------|-------------|
| 0.624530017 | 0.082149997 | 0.207220003 |
| 0.997080028 | 0.334699988 | 0.208279997 |
| 0.878250003 | 0.083059996 | 0.208179995 |
| 0.748560011 | 0.329510003 | 0.207980007 |
| 0.875760019 | 0.581860006 | 0.207739994 |
| 0.626900017 | 0.583649993 | 0.207460001 |
| 0.250459999 | 0.829249978 | 0.209230006 |
| 0.501879990 | 0.833959997 | 0.209849998 |
| 0.999660015 | 0.830749989 | 0.209869996 |
| 0.373450011 | 0.081529997 | 0.209649995 |
| 0.498939991 | 0.332359999 | 0.207959995 |
| 0.124210000 | 0.246050000 | 0.305660009 |
| 0.252680004 | 0.491679996 | 0.317059994 |
| 0.752740026 | 0.001870000 | 0.311349988 |
| 0.872969985 | 0.749870002 | 0.313749999 |
| 0.627059996 | 0.752789974 | 0.322869986 |
| 0.250910014 | 0.996200025 | 0.316870004 |
| 0.128910005 | 0.740130007 | 0.315450013 |
| 0.749509990 | 0.492359996 | 0.312759995 |
| 0.376879990 | 0.751529992 | 0.315860003 |
| 0.498400003 | 0.002010000 | 0.317409992 |
| 0.620029986 | 0.249799997 | 0.315519989 |
| 0.876590014 | 0.247339994 | 0.319050014 |
| 0.503600001 | 0.501320004 | 0.311749995 |
| 0.003510000 | 0.997879982 | 0.322329998 |
| 0.002120000 | 0.497060001 | 0.321709991 |
| 0.368360013 | 0.250070006 | 0.318260014 |

**CH2-H**

1.0

|               |              |               |
|---------------|--------------|---------------|
| 11.1216001511 | 0.0000000000 | 0.0000000000  |
| 0.0000000000  | 9.6316003799 | 0.0000000000  |
| 0.0000000000  | 0.0000000000 | 21.7964000702 |

| C | H | O | Pt |
|---|---|---|----|
| 8 | 3 | 7 | 64 |

Direct

|             |             |             |
|-------------|-------------|-------------|
| 0.487170011 | 0.666249990 | 0.379729986 |
| 0.871599972 | 0.411330014 | 0.381579995 |
| 0.864400029 | 0.077959999 | 0.381049991 |
| 0.548959970 | 0.126650006 | 0.385650009 |
| 0.762660027 | 0.747009993 | 0.386220008 |
| 0.079329997 | 0.626139998 | 0.387320012 |



|             |             |             |
|-------------|-------------|-------------|
| 0.138990000 | 0.986320019 | 0.387569994 |
| 0.306329995 | 0.367680013 | 0.388709992 |
| 0.620450020 | 0.413269997 | 0.356099993 |
| 0.230800003 | 0.323009998 | 0.414590001 |
| 0.376230001 | 0.410239995 | 0.418859988 |
| 0.482760012 | 0.654959977 | 0.434179991 |
| 0.863499999 | 0.413340002 | 0.435999990 |
| 0.855030000 | 0.074610002 | 0.435350001 |
| 0.548139989 | 0.130119994 | 0.439770013 |
| 0.768830001 | 0.744840026 | 0.440160006 |
| 0.082960002 | 0.629710019 | 0.441309988 |
| 0.141190007 | 0.986100018 | 0.441630006 |
| 0.000000000 | 0.000000000 | 0.000000000 |
| 0.000000000 | 0.500000000 | 0.000000000 |
| 0.125000000 | 0.250000000 | 0.000000000 |
| 0.125000000 | 0.750000000 | 0.000000000 |
| 0.250000000 | 0.000000000 | 0.000000000 |
| 0.250000000 | 0.500000000 | 0.000000000 |
| 0.375000000 | 0.250000000 | 0.000000000 |
| 0.375000000 | 0.750000000 | 0.000000000 |
| 0.500000000 | 0.000000000 | 0.000000000 |
| 0.500000000 | 0.500000000 | 0.000000000 |
| 0.625000000 | 0.250000000 | 0.000000000 |
| 0.625000000 | 0.750000000 | 0.000000000 |
| 0.750000000 | 0.000000000 | 0.000000000 |
| 0.750000000 | 0.500000000 | 0.000000000 |
| 0.875000000 | 0.250000000 | 0.000000000 |
| 0.875000000 | 0.750000000 | 0.000000000 |
| 0.000000000 | 0.166669995 | 0.103940003 |
| 0.000000000 | 0.666670024 | 0.103940003 |
| 0.125000000 | 0.416669995 | 0.103940003 |
| 0.125000000 | 0.916670024 | 0.103940003 |
| 0.250000000 | 0.166669995 | 0.103940003 |
| 0.250000000 | 0.666670024 | 0.103940003 |
| 0.375000000 | 0.416669995 | 0.103940003 |
| 0.375000000 | 0.916670024 | 0.103940003 |
| 0.500000000 | 0.166669995 | 0.103940003 |
| 0.500000000 | 0.666670024 | 0.103940003 |
| 0.625000000 | 0.416669995 | 0.103940003 |
| 0.625000000 | 0.916670024 | 0.103940003 |
| 0.750000000 | 0.166669995 | 0.103940003 |

|             |             |             |
|-------------|-------------|-------------|
| 0.750000000 | 0.666670024 | 0.103940003 |
| 0.875000000 | 0.416669995 | 0.103940003 |
| 0.875000000 | 0.916670024 | 0.103940003 |
| 0.251179993 | 0.331750005 | 0.205890000 |
| 0.124490000 | 0.077119999 | 0.206410006 |
| 0.624629974 | 0.083889998 | 0.207530007 |
| 0.627110004 | 0.583800018 | 0.207609996 |
| 0.375490010 | 0.582530022 | 0.207790002 |
| 0.748560011 | 0.833249986 | 0.207389995 |
| 0.874979973 | 0.581439972 | 0.208169997 |
| 0.748449981 | 0.330509990 | 0.208590001 |
| 0.499309987 | 0.332940012 | 0.208320007 |
| 0.997060001 | 0.334939986 | 0.208120003 |
| 0.878310025 | 0.083379999 | 0.207900003 |
| 0.125149995 | 0.578610003 | 0.208470002 |
| 0.250640005 | 0.828710020 | 0.208890006 |
| 0.373530000 | 0.081529997 | 0.209450006 |
| 0.502149999 | 0.834460020 | 0.209670007 |
| 0.999379992 | 0.830489993 | 0.209769994 |
| 0.124320000 | 0.245810002 | 0.305339992 |
| 0.753719985 | 0.002040000 | 0.311049998 |
| 0.502009988 | 0.504610002 | 0.312640011 |
| 0.753180027 | 0.493880004 | 0.314700007 |
| 0.873290002 | 0.750370026 | 0.313620001 |
| 0.619780004 | 0.245959997 | 0.317039996 |
| 0.375739992 | 0.752009988 | 0.315400004 |
| 0.128989995 | 0.740769982 | 0.315120012 |
| 0.252739996 | 0.491569996 | 0.317110002 |
| 0.250629991 | 0.996330023 | 0.316430002 |
| 0.497700006 | 0.001300000 | 0.317110002 |
| 0.367080003 | 0.249329999 | 0.317389995 |
| 0.878549993 | 0.246399999 | 0.318370014 |
| 0.003980000 | 0.497669995 | 0.321969986 |
| 0.626839995 | 0.755299985 | 0.322530001 |
| 0.003840000 | 0.997219980 | 0.322510004 |

### CH3

1.0

|               |              |               |
|---------------|--------------|---------------|
| 11.1216001511 | 0.0000000000 | 0.0000000000  |
| 0.0000000000  | 9.6316003799 | 0.0000000000  |
| 0.0000000000  | 0.0000000000 | 21.7964000702 |

C H O Pt

## Direct

|             |             |             |
|-------------|-------------|-------------|
| 0.434170008 | 0.618619978 | 0.384730011 |
| 0.817460001 | 0.389690012 | 0.386949986 |
| 0.869530022 | 0.068790004 | 0.381350011 |
| 0.546509981 | 0.130579993 | 0.384240001 |
| 0.752160013 | 0.738919973 | 0.383650005 |
| 0.059420001 | 0.614459991 | 0.386409998 |
| 0.138589993 | 0.923950016 | 0.381839991 |
| 0.147200003 | 0.261240005 | 0.415749997 |
| 0.223800004 | 0.196579993 | 0.429300010 |
| 0.063369997 | 0.220719993 | 0.435240000 |
| 0.161599994 | 0.369280010 | 0.429529995 |
| 0.428330004 | 0.615390003 | 0.438800007 |
| 0.819850028 | 0.396780014 | 0.440899998 |
| 0.861840010 | 0.062530003 | 0.435719997 |
| 0.542190015 | 0.137700006 | 0.438279986 |
| 0.754830003 | 0.736620009 | 0.437739998 |
| 0.057390001 | 0.609730005 | 0.440439999 |
| 0.142480001 | 0.927839994 | 0.436379999 |
| 0.000000000 | 0.000000000 | 0.000000000 |
| 0.000000000 | 0.500000000 | 0.000000000 |
| 0.125000000 | 0.250000000 | 0.000000000 |
| 0.125000000 | 0.750000000 | 0.000000000 |
| 0.250000000 | 0.000000000 | 0.000000000 |
| 0.250000000 | 0.500000000 | 0.000000000 |
| 0.375000000 | 0.250000000 | 0.000000000 |
| 0.375000000 | 0.750000000 | 0.000000000 |
| 0.500000000 | 0.000000000 | 0.000000000 |
| 0.500000000 | 0.500000000 | 0.000000000 |
| 0.625000000 | 0.250000000 | 0.000000000 |
| 0.625000000 | 0.750000000 | 0.000000000 |
| 0.750000000 | 0.000000000 | 0.000000000 |
| 0.750000000 | 0.500000000 | 0.000000000 |
| 0.875000000 | 0.250000000 | 0.000000000 |
| 0.875000000 | 0.750000000 | 0.000000000 |
| 0.000000000 | 0.166669995 | 0.103940003 |
| 0.000000000 | 0.666670024 | 0.103940003 |
| 0.125000000 | 0.416669995 | 0.103940003 |
| 0.125000000 | 0.916670024 | 0.103940003 |
| 0.250000000 | 0.166669995 | 0.103940003 |

|             |             |             |
|-------------|-------------|-------------|
| 0.250000000 | 0.666670024 | 0.103940003 |
| 0.375000000 | 0.416669995 | 0.103940003 |
| 0.375000000 | 0.916670024 | 0.103940003 |
| 0.500000000 | 0.166669995 | 0.103940003 |
| 0.500000000 | 0.666670024 | 0.103940003 |
| 0.625000000 | 0.416669995 | 0.103940003 |
| 0.625000000 | 0.916670024 | 0.103940003 |
| 0.750000000 | 0.166669995 | 0.103940003 |
| 0.750000000 | 0.666670024 | 0.103940003 |
| 0.875000000 | 0.416669995 | 0.103940003 |
| 0.875000000 | 0.916670024 | 0.103940003 |
| 0.247510001 | 0.330529988 | 0.205699995 |
| 0.124380000 | 0.082149997 | 0.209240004 |
| 0.625670016 | 0.082340002 | 0.207100004 |
| 0.627219975 | 0.582159996 | 0.209240004 |
| 0.377629995 | 0.583320022 | 0.206060007 |
| 0.751139998 | 0.834150016 | 0.206420004 |
| 0.874740005 | 0.581749976 | 0.207709998 |
| 0.750090003 | 0.329879999 | 0.208370000 |
| 0.501190007 | 0.334080011 | 0.207279995 |
| 0.999520004 | 0.333719999 | 0.210749999 |
| 0.879209995 | 0.085969999 | 0.208829999 |
| 0.124030001 | 0.585389972 | 0.206819996 |
| 0.249919996 | 0.829200029 | 0.209549993 |
| 0.373750001 | 0.077739999 | 0.206990004 |
| 0.502219975 | 0.832539976 | 0.209869996 |
| 0.000040000 | 0.833500028 | 0.209700003 |
| 0.131410003 | 0.252359986 | 0.320569992 |
| 0.754329979 | 0.002560000 | 0.311690003 |
| 0.498519987 | 0.496549994 | 0.317099988 |
| 0.747590005 | 0.491450012 | 0.315299988 |
| 0.872720003 | 0.748369992 | 0.313840002 |
| 0.618789971 | 0.247020006 | 0.315690011 |
| 0.379240006 | 0.747349977 | 0.316810012 |
| 0.128289998 | 0.746810019 | 0.321660012 |
| 0.252669990 | 0.495000005 | 0.307099998 |
| 0.253549993 | 0.997820020 | 0.315180004 |
| 0.499949992 | 0.997290015 | 0.317389995 |
| 0.371879995 | 0.248150006 | 0.308140010 |
| 0.877950013 | 0.250779986 | 0.322329998 |
| 0.006060000 | 0.499359995 | 0.314770013 |

|             |             |             |
|-------------|-------------|-------------|
| 0.628189981 | 0.751689970 | 0.316289991 |
| 0.003510000 | 0.001750000 | 0.319799989 |

**CH3-H**

1.0

|               |              |               |
|---------------|--------------|---------------|
| 11.1216001511 | 0.0000000000 | 0.0000000000  |
| 0.0000000000  | 9.6316003799 | 0.0000000000  |
| 0.0000000000  | 0.0000000000 | 21.7964000702 |

|   |   |   |    |
|---|---|---|----|
| C | H | O | Pt |
| 8 | 4 | 7 | 64 |

Direct

|             |             |             |
|-------------|-------------|-------------|
| 0.487729996 | 0.664430022 | 0.380800009 |
| 0.870500028 | 0.069559999 | 0.380980015 |
| 0.139970005 | 0.922909975 | 0.381599993 |
| 0.818870008 | 0.390850008 | 0.386629999 |
| 0.549269974 | 0.133330002 | 0.383819997 |
| 0.764989972 | 0.743390024 | 0.386530012 |
| 0.063419998 | 0.613139987 | 0.386400014 |
| 0.144970000 | 0.258150011 | 0.415540010 |
| 0.373890013 | 0.411289990 | 0.353720009 |
| 0.153280005 | 0.366549999 | 0.429910004 |
| 0.225020006 | 0.198919997 | 0.428750008 |
| 0.063740000 | 0.210879996 | 0.434799999 |
| 0.479330003 | 0.660589993 | 0.435250014 |
| 0.863520026 | 0.062749997 | 0.435400009 |
| 0.143370003 | 0.927550018 | 0.436140001 |
| 0.820439994 | 0.398270011 | 0.440569997 |
| 0.545549989 | 0.139799997 | 0.437889993 |
| 0.772880018 | 0.740170002 | 0.440369993 |
| 0.061469998 | 0.607640028 | 0.440420002 |
| 0.000000000 | 0.000000000 | 0.000000000 |
| 0.000000000 | 0.500000000 | 0.000000000 |
| 0.125000000 | 0.250000000 | 0.000000000 |
| 0.125000000 | 0.750000000 | 0.000000000 |
| 0.250000000 | 0.000000000 | 0.000000000 |
| 0.250000000 | 0.500000000 | 0.000000000 |
| 0.375000000 | 0.250000000 | 0.000000000 |
| 0.375000000 | 0.750000000 | 0.000000000 |
| 0.500000000 | 0.000000000 | 0.000000000 |
| 0.500000000 | 0.500000000 | 0.000000000 |
| 0.625000000 | 0.250000000 | 0.000000000 |
| 0.625000000 | 0.750000000 | 0.000000000 |

|             |             |             |
|-------------|-------------|-------------|
| 0.750000000 | 0.000000000 | 0.000000000 |
| 0.750000000 | 0.500000000 | 0.000000000 |
| 0.875000000 | 0.250000000 | 0.000000000 |
| 0.875000000 | 0.750000000 | 0.000000000 |
| 0.000000000 | 0.166669995 | 0.103940003 |
| 0.000000000 | 0.666670024 | 0.103940003 |
| 0.125000000 | 0.416669995 | 0.103940003 |
| 0.125000000 | 0.916670024 | 0.103940003 |
| 0.250000000 | 0.166669995 | 0.103940003 |
| 0.250000000 | 0.666670024 | 0.103940003 |
| 0.375000000 | 0.416669995 | 0.103940003 |
| 0.375000000 | 0.916670024 | 0.103940003 |
| 0.500000000 | 0.166669995 | 0.103940003 |
| 0.500000000 | 0.666670024 | 0.103940003 |
| 0.625000000 | 0.416669995 | 0.103940003 |
| 0.625000000 | 0.916670024 | 0.103940003 |
| 0.750000000 | 0.166669995 | 0.103940003 |
| 0.750000000 | 0.666670024 | 0.103940003 |
| 0.875000000 | 0.416669995 | 0.103940003 |
| 0.875000000 | 0.916670024 | 0.103940003 |
| 0.378380001 | 0.583750010 | 0.206479996 |
| 0.248229995 | 0.331099987 | 0.206269994 |
| 0.501259983 | 0.334380001 | 0.207130000 |
| 0.626259983 | 0.082369998 | 0.207000002 |
| 0.749379992 | 0.832189977 | 0.207289994 |
| 0.374069989 | 0.079690002 | 0.207269996 |
| 0.875320017 | 0.581449986 | 0.207399994 |
| 0.125550002 | 0.584670007 | 0.207149997 |
| 0.750509977 | 0.329759985 | 0.207900003 |
| 0.879159987 | 0.085170001 | 0.208629996 |
| 0.627009988 | 0.582729995 | 0.209900007 |
| 0.250099987 | 0.829750001 | 0.208939999 |
| 0.124499999 | 0.082240000 | 0.208849996 |
| 0.000170000 | 0.832710028 | 0.209370002 |
| 0.503780007 | 0.833670020 | 0.209500000 |
| 0.000040000 | 0.333460003 | 0.210649997 |
| 0.253089994 | 0.498589993 | 0.308470011 |
| 0.373070002 | 0.247030005 | 0.309560001 |
| 0.755089998 | 0.001720000 | 0.311450005 |
| 0.873300016 | 0.748929977 | 0.312909991 |
| 0.751010001 | 0.491279989 | 0.314150006 |

|             |             |             |
|-------------|-------------|-------------|
| 0.253250003 | 0.999080002 | 0.314660013 |
| 0.379720002 | 0.752479970 | 0.313870013 |
| 0.503589988 | 0.499249995 | 0.317680001 |
| 0.622619987 | 0.246849999 | 0.314790010 |
| 0.501209974 | 0.000060000 | 0.317090005 |
| 0.129700005 | 0.747020006 | 0.321669996 |
| 0.879360020 | 0.250420004 | 0.322380006 |
| 0.006780000 | 0.499969989 | 0.314680010 |
| 0.004040000 | 0.001050000 | 0.319200009 |
| 0.628409982 | 0.751929998 | 0.323599994 |
| 0.130500004 | 0.251700014 | 0.320219994 |

#### CH4

1.0

|               |              |               |
|---------------|--------------|---------------|
| 11.1216001511 | 0.0000000000 | 0.0000000000  |
| 0.0000000000  | 9.6316003799 | 0.0000000000  |
| 0.0000000000  | 0.0000000000 | 21.7964000702 |

| C | H | O | Pt |
|---|---|---|----|
| 8 | 4 | 7 | 64 |

Direct

|             |             |             |
|-------------|-------------|-------------|
| 0.437689990 | 0.621070027 | 0.385149986 |
| 0.864929974 | 0.078019999 | 0.381909996 |
| 0.139349997 | 0.976610005 | 0.387349993 |
| 0.858169973 | 0.412759990 | 0.382180005 |
| 0.542010009 | 0.134480000 | 0.384160012 |
| 0.751659989 | 0.742039979 | 0.384020001 |
| 0.073459998 | 0.627330005 | 0.387320012 |
| 0.194830000 | 0.309139997 | 0.468629986 |
| 0.256190002 | 0.318489999 | 0.429199994 |
| 0.195510000 | 0.406960011 | 0.494329989 |
| 0.225130007 | 0.223250002 | 0.497790009 |
| 0.103030004 | 0.288060009 | 0.452529997 |
| 0.435110003 | 0.618309975 | 0.439280003 |
| 0.855589986 | 0.073689997 | 0.436190009 |
| 0.142059997 | 0.968529999 | 0.441280007 |
| 0.853619993 | 0.417549998 | 0.436610013 |
| 0.535529971 | 0.142309994 | 0.438149989 |
| 0.753459990 | 0.739799976 | 0.438109994 |
| 0.078180000 | 0.630469978 | 0.441269994 |
| 0.000000000 | 0.000000000 | 0.000000000 |
| 0.000000000 | 0.500000000 | 0.000000000 |
| 0.125000000 | 0.250000000 | 0.000000000 |

|             |             |             |
|-------------|-------------|-------------|
| 0.125000000 | 0.750000000 | 0.000000000 |
| 0.250000000 | 0.000000000 | 0.000000000 |
| 0.250000000 | 0.500000000 | 0.000000000 |
| 0.375000000 | 0.250000000 | 0.000000000 |
| 0.375000000 | 0.750000000 | 0.000000000 |
| 0.500000000 | 0.000000000 | 0.000000000 |
| 0.500000000 | 0.500000000 | 0.000000000 |
| 0.625000000 | 0.250000000 | 0.000000000 |
| 0.625000000 | 0.750000000 | 0.000000000 |
| 0.750000000 | 0.000000000 | 0.000000000 |
| 0.750000000 | 0.500000000 | 0.000000000 |
| 0.875000000 | 0.250000000 | 0.000000000 |
| 0.875000000 | 0.750000000 | 0.000000000 |
| 0.000000000 | 0.166669995 | 0.103940003 |
| 0.000000000 | 0.666670024 | 0.103940003 |
| 0.125000000 | 0.416669995 | 0.103940003 |
| 0.125000000 | 0.916670024 | 0.103940003 |
| 0.250000000 | 0.166669995 | 0.103940003 |
| 0.250000000 | 0.666670024 | 0.103940003 |
| 0.375000000 | 0.416669995 | 0.103940003 |
| 0.375000000 | 0.916670024 | 0.103940003 |
| 0.500000000 | 0.166669995 | 0.103940003 |
| 0.500000000 | 0.666670024 | 0.103940003 |
| 0.625000000 | 0.416669995 | 0.103940003 |
| 0.625000000 | 0.916670024 | 0.103940003 |
| 0.750000000 | 0.166669995 | 0.103940003 |
| 0.750000000 | 0.666670024 | 0.103940003 |
| 0.875000000 | 0.416669995 | 0.103940003 |
| 0.875000000 | 0.916670024 | 0.103940003 |
| 0.376940012 | 0.583150029 | 0.206440002 |
| 0.249980003 | 0.330419987 | 0.204229996 |
| 0.500980020 | 0.334140003 | 0.207589999 |
| 0.624949992 | 0.082269996 | 0.207450002 |
| 0.750620008 | 0.834299982 | 0.206650004 |
| 0.373640001 | 0.076870002 | 0.207959995 |
| 0.874210000 | 0.582170010 | 0.208320007 |
| 0.121730000 | 0.581250012 | 0.206949994 |
| 0.748979986 | 0.329769999 | 0.208759993 |
| 0.878880024 | 0.084420003 | 0.208719999 |
| 0.626470029 | 0.582530022 | 0.208790004 |
| 0.249860004 | 0.828019977 | 0.209639996 |



|             |             |             |
|-------------|-------------|-------------|
| 0.124650002 | 0.078680001 | 0.207409993 |
| 0.999080002 | 0.832759976 | 0.209979996 |
| 0.501720011 | 0.832629979 | 0.210140005 |
| 0.997229993 | 0.334980011 | 0.209279999 |
| 0.250860006 | 0.492559999 | 0.307810009 |
| 0.370920002 | 0.248280004 | 0.309500009 |
| 0.753790021 | 0.003000000 | 0.311949998 |
| 0.873000026 | 0.750069976 | 0.314700007 |
| 0.746749997 | 0.492130011 | 0.314649999 |
| 0.252680004 | 0.996110022 | 0.316989988 |
| 0.377220005 | 0.747030020 | 0.317640007 |
| 0.498270005 | 0.497060001 | 0.317140013 |
| 0.619050026 | 0.248689994 | 0.316439986 |
| 0.499509990 | 0.997399986 | 0.317880005 |
| 0.127470002 | 0.741999984 | 0.315719992 |
| 0.877780020 | 0.248349994 | 0.319959998 |
| 0.002380000 | 0.497480005 | 0.322140008 |
| 0.004780000 | 0.000370000 | 0.322789997 |
| 0.627740026 | 0.751770020 | 0.316419989 |
| 0.129250005 | 0.249829993 | 0.308640003 |

CH-CO

1.0

|               |              |               |
|---------------|--------------|---------------|
| 11.1216001511 | 0.0000000000 | 0.0000000000  |
| 0.0000000000  | 9.6316003799 | 0.0000000000  |
| 0.0000000000  | 0.0000000000 | 21.7964000702 |

| C | H | O | Pt |
|---|---|---|----|
| 9 | 1 | 8 | 64 |

Direct

|             |             |             |
|-------------|-------------|-------------|
| 0.369159997 | 0.408950001 | 0.368550003 |
| 0.133939996 | 0.100790001 | 0.381080002 |
| 0.077090003 | 0.633050025 | 0.387010008 |
| 0.510469973 | 0.658439994 | 0.384429991 |
| 0.770560026 | 0.751770020 | 0.386830002 |
| 0.862990022 | 0.077059999 | 0.380129993 |
| 0.567780018 | 0.144759998 | 0.386830002 |
| 0.862370014 | 0.416350007 | 0.380970001 |
| 0.366549999 | 0.920009971 | 0.383910000 |
| 0.365040004 | 0.406709999 | 0.418969989 |
| 0.135790005 | 0.108719997 | 0.435449988 |
| 0.081589997 | 0.636460006 | 0.440959990 |
| 0.505760014 | 0.654380023 | 0.438919991 |

|             |             |             |
|-------------|-------------|-------------|
| 0.777220011 | 0.751659989 | 0.440660000 |
| 0.854749978 | 0.073500000 | 0.434460014 |
| 0.568300009 | 0.153410003 | 0.440710008 |
| 0.853640020 | 0.419050008 | 0.435299993 |
| 0.363359988 | 0.920080006 | 0.438349992 |
| 0.000000000 | 0.000000000 | 0.000000000 |
| 0.000000000 | 0.500000000 | 0.000000000 |
| 0.125000000 | 0.250000000 | 0.000000000 |
| 0.125000000 | 0.750000000 | 0.000000000 |
| 0.250000000 | 0.000000000 | 0.000000000 |
| 0.250000000 | 0.500000000 | 0.000000000 |
| 0.375000000 | 0.250000000 | 0.000000000 |
| 0.375000000 | 0.750000000 | 0.000000000 |
| 0.500000000 | 0.000000000 | 0.000000000 |
| 0.500000000 | 0.500000000 | 0.000000000 |
| 0.625000000 | 0.250000000 | 0.000000000 |
| 0.625000000 | 0.750000000 | 0.000000000 |
| 0.750000000 | 0.000000000 | 0.000000000 |
| 0.750000000 | 0.500000000 | 0.000000000 |
| 0.875000000 | 0.250000000 | 0.000000000 |
| 0.875000000 | 0.750000000 | 0.000000000 |
| 0.000000000 | 0.166669995 | 0.103940003 |
| 0.000000000 | 0.666670024 | 0.103940003 |
| 0.125000000 | 0.416669995 | 0.103940003 |
| 0.125000000 | 0.916670024 | 0.103940003 |
| 0.250000000 | 0.166669995 | 0.103940003 |
| 0.250000000 | 0.666670024 | 0.103940003 |
| 0.375000000 | 0.416669995 | 0.103940003 |
| 0.375000000 | 0.916670024 | 0.103940003 |
| 0.500000000 | 0.166669995 | 0.103940003 |
| 0.500000000 | 0.666670024 | 0.103940003 |
| 0.625000000 | 0.416669995 | 0.103940003 |
| 0.625000000 | 0.916670024 | 0.103940003 |
| 0.750000000 | 0.166669995 | 0.103940003 |
| 0.750000000 | 0.666670024 | 0.103940003 |
| 0.875000000 | 0.416669995 | 0.103940003 |
| 0.875000000 | 0.916670024 | 0.103940003 |
| 0.125349998 | 0.580269992 | 0.207900003 |
| 0.876060009 | 0.582000017 | 0.207139999 |
| 0.501519978 | 0.834540009 | 0.211300001 |
| 0.000080000 | 0.832719982 | 0.209429994 |

|             |             |             |
|-------------|-------------|-------------|
| 0.251789987 | 0.831759989 | 0.209729999 |
| 0.747439981 | 0.831369996 | 0.207289994 |
| 0.999610007 | 0.333990008 | 0.209790006 |
| 0.125929996 | 0.079080001 | 0.207959995 |
| 0.877950013 | 0.084220000 | 0.207059994 |
| 0.623660028 | 0.583029985 | 0.209759995 |
| 0.376289994 | 0.586989999 | 0.208560005 |
| 0.623139977 | 0.081009999 | 0.207670003 |
| 0.375559986 | 0.082829997 | 0.208509997 |
| 0.749040008 | 0.330240011 | 0.207379997 |
| 0.249170005 | 0.332219988 | 0.206110001 |
| 0.500230014 | 0.335979998 | 0.207190007 |
| 0.251590014 | 0.499639988 | 0.313389987 |
| 0.503650010 | 0.003740000 | 0.323520005 |
| 0.752240002 | 0.494520009 | 0.311390013 |
| 0.002820000 | 0.998570025 | 0.321680009 |
| 0.127379999 | 0.745790005 | 0.314269990 |
| 0.876190007 | 0.752290010 | 0.313080013 |
| 0.004500000 | 0.499170005 | 0.322589993 |
| 0.250059992 | 0.998310030 | 0.317449987 |
| 0.126599997 | 0.247559994 | 0.312700003 |
| 0.379999995 | 0.752160013 | 0.321200013 |
| 0.754740000 | 0.002440000 | 0.309720010 |
| 0.876730025 | 0.249329999 | 0.318439990 |
| 0.631760001 | 0.751290023 | 0.323480010 |
| 0.503769994 | 0.498109996 | 0.320210010 |
| 0.625490010 | 0.249139994 | 0.313549995 |
| 0.373589993 | 0.249720007 | 0.311729997 |

**CHCO**

1.0

|               |              |               |
|---------------|--------------|---------------|
| 11.1216001511 | 0.0000000000 | 0.0000000000  |
| 0.0000000000  | 9.6316003799 | 0.0000000000  |
| 0.0000000000  | 0.0000000000 | 21.7964000702 |

| C | H | O | Pt |
|---|---|---|----|
| 9 | 1 | 8 | 64 |

Direct

|             |             |             |
|-------------|-------------|-------------|
| 0.862420022 | 0.070830002 | 0.380600005 |
| 0.137610003 | 0.095449999 | 0.381060004 |
| 0.860279977 | 0.410279989 | 0.381749988 |
| 0.372999996 | 0.892279983 | 0.382770002 |
| 0.747910023 | 0.738770008 | 0.383899987 |

|             |             |             |
|-------------|-------------|-------------|
| 0.332830012 | 0.387930006 | 0.385109991 |
| 0.563830018 | 0.138029993 | 0.386660010 |
| 0.070280001 | 0.630630016 | 0.387690008 |
| 0.442009985 | 0.463330001 | 0.401369989 |
| 0.275500000 | 0.350479990 | 0.422769994 |
| 0.854330003 | 0.067890003 | 0.434920013 |
| 0.137740001 | 0.106720001 | 0.435400009 |
| 0.852349997 | 0.413190007 | 0.436080009 |
| 0.369630009 | 0.886650026 | 0.437169999 |
| 0.749960005 | 0.737540007 | 0.437940001 |
| 0.565909982 | 0.145449996 | 0.440589994 |
| 0.074340001 | 0.634540021 | 0.441650003 |
| 0.490240008 | 0.498250008 | 0.448089987 |
| 0.000000000 | 0.000000000 | 0.000000000 |
| 0.000000000 | 0.500000000 | 0.000000000 |
| 0.125000000 | 0.250000000 | 0.000000000 |
| 0.125000000 | 0.750000000 | 0.000000000 |
| 0.250000000 | 0.000000000 | 0.000000000 |
| 0.250000000 | 0.500000000 | 0.000000000 |
| 0.375000000 | 0.250000000 | 0.000000000 |
| 0.375000000 | 0.750000000 | 0.000000000 |
| 0.500000000 | 0.000000000 | 0.000000000 |
| 0.500000000 | 0.500000000 | 0.000000000 |
| 0.625000000 | 0.250000000 | 0.000000000 |
| 0.625000000 | 0.750000000 | 0.000000000 |
| 0.750000000 | 0.000000000 | 0.000000000 |
| 0.750000000 | 0.500000000 | 0.000000000 |
| 0.875000000 | 0.250000000 | 0.000000000 |
| 0.875000000 | 0.750000000 | 0.000000000 |
| 0.000000000 | 0.166669995 | 0.103940003 |
| 0.000000000 | 0.666670024 | 0.103940003 |
| 0.125000000 | 0.416669995 | 0.103940003 |
| 0.125000000 | 0.916670024 | 0.103940003 |
| 0.250000000 | 0.166669995 | 0.103940003 |
| 0.250000000 | 0.666670024 | 0.103940003 |
| 0.375000000 | 0.416669995 | 0.103940003 |
| 0.375000000 | 0.916670024 | 0.103940003 |
| 0.500000000 | 0.166669995 | 0.103940003 |
| 0.500000000 | 0.666670024 | 0.103940003 |
| 0.625000000 | 0.416669995 | 0.103940003 |
| 0.625000000 | 0.916670024 | 0.103940003 |

|             |             |             |
|-------------|-------------|-------------|
| 0.750000000 | 0.166669995 | 0.103940003 |
| 0.750000000 | 0.666670024 | 0.103940003 |
| 0.875000000 | 0.416669995 | 0.103940003 |
| 0.875000000 | 0.916670024 | 0.103940003 |
| 0.750270009 | 0.832189977 | 0.206430003 |
| 0.249449998 | 0.331070006 | 0.206689999 |
| 0.499680012 | 0.332760006 | 0.207139999 |
| 0.877219975 | 0.083860002 | 0.207340002 |
| 0.626089990 | 0.581669986 | 0.207589999 |
| 0.876060009 | 0.580630004 | 0.207670003 |
| 0.375030011 | 0.585560024 | 0.207810000 |
| 0.622399986 | 0.079599999 | 0.207890004 |
| 0.124969997 | 0.077909999 | 0.207870007 |
| 0.748480022 | 0.328689992 | 0.207920000 |
| 0.247700006 | 0.831690013 | 0.208800003 |
| 0.124739997 | 0.577929974 | 0.208890006 |
| 0.500670016 | 0.834280014 | 0.209460005 |
| 0.998700023 | 0.332879990 | 0.209900007 |
| 0.374179989 | 0.082750000 | 0.209989995 |
| 0.998769999 | 0.831300020 | 0.210020006 |
| 0.752139986 | 0.999379992 | 0.310479999 |
| 0.124729998 | 0.243100002 | 0.311749995 |
| 0.748549998 | 0.492110014 | 0.313279986 |
| 0.621429980 | 0.246590003 | 0.314090014 |
| 0.504159987 | 0.502529979 | 0.314249992 |
| 0.376269996 | 0.746940017 | 0.314429998 |
| 0.251139998 | 0.494879991 | 0.314590007 |
| 0.371149987 | 0.251399994 | 0.314619988 |
| 0.123939998 | 0.741819978 | 0.315319985 |
| 0.872070014 | 0.748319983 | 0.315259993 |
| 0.626070023 | 0.747250021 | 0.315640002 |
| 0.874180019 | 0.246140003 | 0.318720013 |
| 0.249349996 | 0.993409991 | 0.319200009 |
| 0.000560000 | 0.995209992 | 0.321489990 |
| 0.001490000 | 0.495209992 | 0.323060006 |
| 0.500949979 | 0.998030007 | 0.323320001 |

**CHCO-H**

1.0

|               |              |               |
|---------------|--------------|---------------|
| 11.1216001511 | 0.0000000000 | 0.0000000000  |
| 0.0000000000  | 9.6316003799 | 0.0000000000  |
| 0.0000000000  | 0.0000000000 | 21.7964000702 |

C H O Pt  
9 2 8 64

Direct

|             |             |             |
|-------------|-------------|-------------|
| 0.862540007 | 0.070230000 | 0.380369991 |
| 0.136580005 | 0.093970001 | 0.380699992 |
| 0.873319983 | 0.407389998 | 0.382279992 |
| 0.372480005 | 0.891520023 | 0.382930011 |
| 0.748260021 | 0.737999976 | 0.383439988 |
| 0.326790005 | 0.385039985 | 0.385159999 |
| 0.563359976 | 0.133829996 | 0.388390005 |
| 0.073559999 | 0.632870018 | 0.387739986 |
| 0.429890007 | 0.467750013 | 0.403499991 |
| 0.628820002 | 0.413919985 | 0.354930013 |
| 0.267839998 | 0.345750004 | 0.421779990 |
| 0.853590012 | 0.067560002 | 0.434650004 |
| 0.137720004 | 0.107009999 | 0.435000002 |
| 0.863449991 | 0.407779992 | 0.436569989 |
| 0.368050009 | 0.885259986 | 0.437290013 |
| 0.750339985 | 0.736079991 | 0.437519997 |
| 0.564920008 | 0.142220005 | 0.442270011 |
| 0.078019999 | 0.636789978 | 0.441670001 |
| 0.472240001 | 0.508499980 | 0.450729996 |
| 0.000000000 | 0.000000000 | 0.000000000 |
| 0.000000000 | 0.500000000 | 0.000000000 |
| 0.125000000 | 0.250000000 | 0.000000000 |
| 0.125000000 | 0.750000000 | 0.000000000 |
| 0.250000000 | 0.000000000 | 0.000000000 |
| 0.250000000 | 0.500000000 | 0.000000000 |
| 0.375000000 | 0.250000000 | 0.000000000 |
| 0.375000000 | 0.750000000 | 0.000000000 |
| 0.500000000 | 0.000000000 | 0.000000000 |
| 0.500000000 | 0.500000000 | 0.000000000 |
| 0.625000000 | 0.250000000 | 0.000000000 |
| 0.625000000 | 0.750000000 | 0.000000000 |
| 0.750000000 | 0.000000000 | 0.000000000 |
| 0.750000000 | 0.500000000 | 0.000000000 |
| 0.875000000 | 0.250000000 | 0.000000000 |
| 0.875000000 | 0.750000000 | 0.000000000 |
| 0.000000000 | 0.166669995 | 0.103940003 |
| 0.000000000 | 0.666670024 | 0.103940003 |
| 0.125000000 | 0.416669995 | 0.103940003 |

|             |             |             |
|-------------|-------------|-------------|
| 0.125000000 | 0.916670024 | 0.103940003 |
| 0.250000000 | 0.166669995 | 0.103940003 |
| 0.250000000 | 0.666670024 | 0.103940003 |
| 0.375000000 | 0.416669995 | 0.103940003 |
| 0.375000000 | 0.916670024 | 0.103940003 |
| 0.500000000 | 0.166669995 | 0.103940003 |
| 0.500000000 | 0.666670024 | 0.103940003 |
| 0.625000000 | 0.416669995 | 0.103940003 |
| 0.625000000 | 0.916670024 | 0.103940003 |
| 0.750000000 | 0.166669995 | 0.103940003 |
| 0.750000000 | 0.666670024 | 0.103940003 |
| 0.875000000 | 0.416669995 | 0.103940003 |
| 0.875000000 | 0.916670024 | 0.103940003 |
| 0.750100017 | 0.832769990 | 0.206190005 |
| 0.249799997 | 0.331059992 | 0.206359997 |
| 0.500039995 | 0.333270013 | 0.207719997 |
| 0.877579987 | 0.084020004 | 0.207169995 |
| 0.625810027 | 0.581439972 | 0.208389997 |
| 0.875440001 | 0.580250025 | 0.207890004 |
| 0.376419991 | 0.585030019 | 0.208230004 |
| 0.622430027 | 0.081529997 | 0.208210006 |
| 0.125259995 | 0.077459998 | 0.207619995 |
| 0.748459995 | 0.329439998 | 0.208360001 |
| 0.248180002 | 0.831269979 | 0.208519995 |
| 0.124679998 | 0.577970028 | 0.208550006 |
| 0.501230001 | 0.835139990 | 0.209360003 |
| 0.998730004 | 0.333059996 | 0.209629998 |
| 0.374570012 | 0.082879998 | 0.210120007 |
| 0.998640001 | 0.831049979 | 0.209800005 |
| 0.752950013 | 0.999610007 | 0.309850007 |
| 0.125049993 | 0.242320001 | 0.310990006 |
| 0.754050016 | 0.493939996 | 0.314700007 |
| 0.621580005 | 0.244169995 | 0.315690011 |
| 0.501829982 | 0.505630016 | 0.317140013 |
| 0.376069993 | 0.748030007 | 0.313950002 |
| 0.250380009 | 0.494509995 | 0.313699991 |
| 0.370499998 | 0.251410007 | 0.314449996 |
| 0.124530002 | 0.742609978 | 0.314790010 |
| 0.872770011 | 0.749080002 | 0.314870000 |
| 0.626429975 | 0.750060022 | 0.315310001 |
| 0.876309991 | 0.244839996 | 0.318069994 |

|             |             |             |
|-------------|-------------|-------------|
| 0.249899998 | 0.993830025 | 0.318940014 |
| 0.001480000 | 0.994329989 | 0.321929991 |
| 0.004040000 | 0.495669991 | 0.323379993 |
| 0.500760019 | 0.997979999 | 0.324119985 |

**CHCHO**

1.0

|               |              |               |
|---------------|--------------|---------------|
| 11.1216001511 | 0.0000000000 | 0.0000000000  |
| 0.0000000000  | 9.6316003799 | 0.0000000000  |
| 0.0000000000  | 0.0000000000 | 21.7964000702 |

|   |   |   |    |
|---|---|---|----|
| C | H | O | Pt |
| 9 | 2 | 8 | 64 |

Direct

|             |             |             |
|-------------|-------------|-------------|
| 0.859899998 | 0.073239997 | 0.380730003 |
| 0.133070007 | 0.090360001 | 0.380230010 |
| 0.861150026 | 0.410299987 | 0.381240010 |
| 0.374579996 | 0.891709983 | 0.382360011 |
| 0.747929990 | 0.739359975 | 0.383879989 |
| 0.313560009 | 0.375640005 | 0.389849991 |
| 0.559499979 | 0.143940002 | 0.385989994 |
| 0.071510002 | 0.630169988 | 0.387870014 |
| 0.405360013 | 0.436289996 | 0.427639991 |
| 0.396739990 | 0.430669993 | 0.478040010 |
| 0.241300002 | 0.328729987 | 0.416979998 |
| 0.851520002 | 0.070610002 | 0.435059994 |
| 0.134849995 | 0.104840003 | 0.434560001 |
| 0.852060020 | 0.413430005 | 0.435579985 |
| 0.370790005 | 0.885200024 | 0.436820000 |
| 0.748449981 | 0.736630023 | 0.437979996 |
| 0.559669971 | 0.153779998 | 0.439999998 |
| 0.075319998 | 0.633520007 | 0.441920012 |
| 0.498540014 | 0.497119993 | 0.407909989 |
| 0.000000000 | 0.000000000 | 0.000000000 |
| 0.000000000 | 0.500000000 | 0.000000000 |
| 0.125000000 | 0.250000000 | 0.000000000 |
| 0.125000000 | 0.750000000 | 0.000000000 |
| 0.250000000 | 0.000000000 | 0.000000000 |
| 0.250000000 | 0.500000000 | 0.000000000 |
| 0.375000000 | 0.250000000 | 0.000000000 |
| 0.375000000 | 0.750000000 | 0.000000000 |
| 0.500000000 | 0.000000000 | 0.000000000 |
| 0.500000000 | 0.500000000 | 0.000000000 |



|             |             |             |
|-------------|-------------|-------------|
| 0.625000000 | 0.250000000 | 0.000000000 |
| 0.625000000 | 0.750000000 | 0.000000000 |
| 0.750000000 | 0.000000000 | 0.000000000 |
| 0.750000000 | 0.500000000 | 0.000000000 |
| 0.875000000 | 0.250000000 | 0.000000000 |
| 0.875000000 | 0.750000000 | 0.000000000 |
| 0.000000000 | 0.166669995 | 0.103940003 |
| 0.000000000 | 0.666670024 | 0.103940003 |
| 0.125000000 | 0.416669995 | 0.103940003 |
| 0.125000000 | 0.916670024 | 0.103940003 |
| 0.250000000 | 0.166669995 | 0.103940003 |
| 0.250000000 | 0.666670024 | 0.103940003 |
| 0.375000000 | 0.416669995 | 0.103940003 |
| 0.375000000 | 0.916670024 | 0.103940003 |
| 0.500000000 | 0.166669995 | 0.103940003 |
| 0.500000000 | 0.666670024 | 0.103940003 |
| 0.625000000 | 0.416669995 | 0.103940003 |
| 0.625000000 | 0.916670024 | 0.103940003 |
| 0.750000000 | 0.166669995 | 0.103940003 |
| 0.750000000 | 0.666670024 | 0.103940003 |
| 0.875000000 | 0.416669995 | 0.103940003 |
| 0.875000000 | 0.916670024 | 0.103940003 |
| 0.750999987 | 0.832769990 | 0.206210002 |
| 0.249699995 | 0.331010014 | 0.206880003 |
| 0.499069989 | 0.332740009 | 0.207039997 |
| 0.877370000 | 0.083530001 | 0.207369998 |
| 0.626079977 | 0.582120001 | 0.207509995 |
| 0.877210021 | 0.581560016 | 0.207190007 |
| 0.374900013 | 0.584969997 | 0.208049998 |
| 0.622380018 | 0.079790004 | 0.207640007 |
| 0.125139996 | 0.076949999 | 0.207289994 |
| 0.748700023 | 0.328929991 | 0.207540005 |
| 0.247810006 | 0.831239998 | 0.208509997 |
| 0.125619993 | 0.577939987 | 0.209140003 |
| 0.500909984 | 0.834599972 | 0.209279999 |
| 0.998560011 | 0.333149999 | 0.209470004 |
| 0.374260008 | 0.082889996 | 0.210260004 |
| 0.999130011 | 0.831229985 | 0.210449994 |
| 0.751919985 | 0.000100000 | 0.310589999 |
| 0.124179997 | 0.240750000 | 0.309729993 |
| 0.752550006 | 0.492980003 | 0.312249988 |

|             |             |             |
|-------------|-------------|-------------|
| 0.621829987 | 0.248170003 | 0.313459992 |
| 0.507849991 | 0.505010009 | 0.311390013 |
| 0.377149999 | 0.746739984 | 0.313890010 |
| 0.252840012 | 0.493950009 | 0.315950006 |
| 0.371019989 | 0.252339989 | 0.315880001 |
| 0.125070006 | 0.741280019 | 0.315699995 |
| 0.873049974 | 0.748870015 | 0.315820009 |
| 0.627900004 | 0.750880003 | 0.315019995 |
| 0.874689996 | 0.245649993 | 0.318250000 |
| 0.249870002 | 0.992820024 | 0.319160014 |
| 0.000530000 | 0.994220018 | 0.322109997 |
| 0.003450000 | 0.494599998 | 0.323159993 |
| 0.500649989 | 0.999830008 | 0.323549986 |

**CHCHO-H**

1.0

|               |              |               |
|---------------|--------------|---------------|
| 11.1216001511 | 0.0000000000 | 0.0000000000  |
| 0.0000000000  | 9.6316003799 | 0.0000000000  |
| 0.0000000000  | 0.0000000000 | 21.7964000702 |

| C | H | O | Pt |
|---|---|---|----|
| 9 | 3 | 8 | 64 |

Direct

|             |             |             |
|-------------|-------------|-------------|
| 0.858020008 | 0.065159999 | 0.381819993 |
| 0.132359996 | 0.088780001 | 0.381909996 |
| 0.801819980 | 0.386359990 | 0.385729998 |
| 0.371419996 | 0.892579973 | 0.382090002 |
| 0.734860003 | 0.740490019 | 0.386510015 |
| 0.553059995 | 0.144140005 | 0.385569990 |
| 0.313950002 | 0.381900012 | 0.390179992 |
| 0.014920000 | 0.662670016 | 0.380970001 |
| 0.407090008 | 0.440420002 | 0.427630007 |
| 0.069250003 | 0.372260004 | 0.363620013 |
| 0.241889998 | 0.335779995 | 0.417679995 |
| 0.399589986 | 0.434280008 | 0.478060007 |
| 0.849659979 | 0.061620001 | 0.436150014 |
| 0.133919999 | 0.099579997 | 0.436329991 |
| 0.799170017 | 0.391999990 | 0.439689994 |
| 0.368759990 | 0.886250019 | 0.436560005 |
| 0.731339991 | 0.737609982 | 0.440459996 |
| 0.553149998 | 0.155169994 | 0.439550012 |
| 0.500440001 | 0.500010014 | 0.407359987 |
| 0.020439999 | 0.661719978 | 0.435530007 |

|             |             |             |
|-------------|-------------|-------------|
| 0.000000000 | 0.000000000 | 0.000000000 |
| 0.000000000 | 0.500000000 | 0.000000000 |
| 0.125000000 | 0.250000000 | 0.000000000 |
| 0.125000000 | 0.750000000 | 0.000000000 |
| 0.250000000 | 0.000000000 | 0.000000000 |
| 0.250000000 | 0.500000000 | 0.000000000 |
| 0.375000000 | 0.250000000 | 0.000000000 |
| 0.375000000 | 0.750000000 | 0.000000000 |
| 0.500000000 | 0.000000000 | 0.000000000 |
| 0.500000000 | 0.500000000 | 0.000000000 |
| 0.625000000 | 0.250000000 | 0.000000000 |
| 0.625000000 | 0.750000000 | 0.000000000 |
| 0.750000000 | 0.000000000 | 0.000000000 |
| 0.750000000 | 0.500000000 | 0.000000000 |
| 0.875000000 | 0.250000000 | 0.000000000 |
| 0.875000000 | 0.750000000 | 0.000000000 |
| 0.000000000 | 0.166669995 | 0.103940003 |
| 0.000000000 | 0.666670024 | 0.103940003 |
| 0.125000000 | 0.416669995 | 0.103940003 |
| 0.125000000 | 0.916670024 | 0.103940003 |
| 0.250000000 | 0.166669995 | 0.103940003 |
| 0.250000000 | 0.666670024 | 0.103940003 |
| 0.375000000 | 0.416669995 | 0.103940003 |
| 0.375000000 | 0.916670024 | 0.103940003 |
| 0.500000000 | 0.166669995 | 0.103940003 |
| 0.500000000 | 0.666670024 | 0.103940003 |
| 0.625000000 | 0.416669995 | 0.103940003 |
| 0.625000000 | 0.916670024 | 0.103940003 |
| 0.750000000 | 0.166669995 | 0.103940003 |
| 0.750000000 | 0.666670024 | 0.103940003 |
| 0.875000000 | 0.416669995 | 0.103940003 |
| 0.875000000 | 0.916670024 | 0.103940003 |
| 0.626800001 | 0.582830012 | 0.207440004 |
| 0.498149991 | 0.333270013 | 0.206939995 |
| 0.753019989 | 0.831700027 | 0.207269996 |
| 0.375380009 | 0.586489975 | 0.207409993 |
| 0.248879999 | 0.332179993 | 0.207629994 |
| 0.876760006 | 0.084710002 | 0.208320007 |
| 0.622879982 | 0.079429999 | 0.207389995 |
| 0.124349996 | 0.080700003 | 0.208189994 |
| 0.748030007 | 0.328960001 | 0.207220003 |

|             |             |             |
|-------------|-------------|-------------|
| 0.877260029 | 0.581990004 | 0.207880005 |
| 0.247749999 | 0.834450006 | 0.207690001 |
| 0.127030000 | 0.581070006 | 0.207959995 |
| 0.501280010 | 0.835409999 | 0.209220007 |
| 0.373510003 | 0.084380001 | 0.210429996 |
| 0.997929990 | 0.332810014 | 0.209050000 |
| 0.998009980 | 0.833549976 | 0.210199997 |
| 0.504170001 | 0.507510006 | 0.310680002 |
| 0.750620008 | 0.998520017 | 0.310829997 |
| 0.118730001 | 0.243809998 | 0.312629998 |
| 0.747969985 | 0.493470013 | 0.312279999 |
| 0.616989970 | 0.246989995 | 0.312649995 |
| 0.367680013 | 0.254949987 | 0.316500008 |
| 0.626479983 | 0.752219975 | 0.314209998 |
| 0.374049991 | 0.749880016 | 0.313239992 |
| 0.124339998 | 0.746110022 | 0.313950002 |
| 0.873090029 | 0.745890021 | 0.322059989 |
| 0.254020005 | 0.500249982 | 0.316029996 |
| 0.866689980 | 0.248129994 | 0.321350008 |
| 0.246969998 | 0.996800005 | 0.319079995 |
| 0.498059988 | 0.999989986 | 0.322849989 |
| 0.997370005 | 0.997659981 | 0.322259992 |
| 0.002630000 | 0.497640014 | 0.317039996 |

## CH2CHO

1.0

|               |              |               |
|---------------|--------------|---------------|
| 11.1216001511 | 0.0000000000 | 0.0000000000  |
| 0.0000000000  | 9.6316003799 | 0.0000000000  |
| 0.0000000000  | 0.0000000000 | 21.7964000702 |

| C | H | O | Pt |
|---|---|---|----|
| 9 | 3 | 8 | 64 |

Direct

|             |             |             |
|-------------|-------------|-------------|
| 0.875750005 | 0.066100001 | 0.379519999 |
| 0.191210002 | 0.142089993 | 0.386539996 |
| 0.811410010 | 0.387160003 | 0.386709988 |
| 0.373789996 | 0.889680028 | 0.382640004 |
| 0.735339999 | 0.740339994 | 0.386680007 |
| 0.552259982 | 0.144649997 | 0.385540009 |
| 0.271470010 | 0.500029981 | 0.412820011 |
| 0.011640000 | 0.661379993 | 0.379110008 |
| 0.392540008 | 0.492709994 | 0.439539999 |
| 0.217590004 | 0.414950013 | 0.432920009 |

|             |             |             |
|-------------|-------------|-------------|
| 0.230179995 | 0.595730007 | 0.431510001 |
| 0.397810012 | 0.487729996 | 0.490319997 |
| 0.874840021 | 0.055300001 | 0.433979988 |
| 0.196170002 | 0.152219996 | 0.440589994 |
| 0.809239984 | 0.395049989 | 0.440660000 |
| 0.373210013 | 0.878430009 | 0.437110007 |
| 0.733539999 | 0.738470018 | 0.440690011 |
| 0.547070026 | 0.158140004 | 0.439350009 |
| 0.490920007 | 0.492900014 | 0.412429988 |
| 0.016430000 | 0.657830000 | 0.433910012 |
| 0.000000000 | 0.000000000 | 0.000000000 |
| 0.000000000 | 0.500000000 | 0.000000000 |
| 0.125000000 | 0.250000000 | 0.000000000 |
| 0.125000000 | 0.750000000 | 0.000000000 |
| 0.250000000 | 0.000000000 | 0.000000000 |
| 0.250000000 | 0.500000000 | 0.000000000 |
| 0.375000000 | 0.250000000 | 0.000000000 |
| 0.375000000 | 0.750000000 | 0.000000000 |
| 0.500000000 | 0.000000000 | 0.000000000 |
| 0.500000000 | 0.500000000 | 0.000000000 |
| 0.625000000 | 0.250000000 | 0.000000000 |
| 0.625000000 | 0.750000000 | 0.000000000 |
| 0.750000000 | 0.000000000 | 0.000000000 |
| 0.750000000 | 0.500000000 | 0.000000000 |
| 0.875000000 | 0.250000000 | 0.000000000 |
| 0.875000000 | 0.750000000 | 0.000000000 |
| 0.000000000 | 0.166669995 | 0.103940003 |
| 0.000000000 | 0.666670024 | 0.103940003 |
| 0.125000000 | 0.416669995 | 0.103940003 |
| 0.125000000 | 0.916670024 | 0.103940003 |
| 0.250000000 | 0.166669995 | 0.103940003 |
| 0.250000000 | 0.666670024 | 0.103940003 |
| 0.375000000 | 0.416669995 | 0.103940003 |
| 0.375000000 | 0.916670024 | 0.103940003 |
| 0.500000000 | 0.166669995 | 0.103940003 |
| 0.500000000 | 0.666670024 | 0.103940003 |
| 0.625000000 | 0.416669995 | 0.103940003 |
| 0.625000000 | 0.916670024 | 0.103940003 |
| 0.750000000 | 0.166669995 | 0.103940003 |
| 0.750000000 | 0.666670024 | 0.103940003 |
| 0.875000000 | 0.416669995 | 0.103940003 |

|             |             |             |
|-------------|-------------|-------------|
| 0.875000000 | 0.916670024 | 0.103940003 |
| 0.626739979 | 0.581979990 | 0.208790004 |
| 0.500970006 | 0.333920002 | 0.205679998 |
| 0.752439976 | 0.831499994 | 0.207690001 |
| 0.374909997 | 0.586070001 | 0.207859993 |
| 0.248009995 | 0.335409999 | 0.206650004 |
| 0.875559986 | 0.085589997 | 0.207570001 |
| 0.623920023 | 0.078649998 | 0.207870007 |
| 0.125719994 | 0.081890002 | 0.208130002 |
| 0.749450028 | 0.329010010 | 0.207969993 |
| 0.875559986 | 0.581019998 | 0.207499996 |
| 0.247280002 | 0.835020006 | 0.209020004 |
| 0.126159996 | 0.582989991 | 0.208010003 |
| 0.502070010 | 0.833410025 | 0.209490001 |
| 0.374460012 | 0.078610003 | 0.207379997 |
| 0.000310000 | 0.332159996 | 0.210179999 |
| 0.997690022 | 0.832300007 | 0.208529994 |
| 0.499879986 | 0.501450002 | 0.312269986 |
| 0.752250016 | 0.999130011 | 0.312599987 |
| 0.126939997 | 0.250829995 | 0.315919995 |
| 0.748359978 | 0.490990013 | 0.313870013 |
| 0.620209992 | 0.245550007 | 0.313290000 |
| 0.373600006 | 0.252530009 | 0.305920005 |
| 0.625360012 | 0.748889983 | 0.315219998 |
| 0.373629987 | 0.749270022 | 0.313030005 |
| 0.123640001 | 0.749769986 | 0.314289987 |
| 0.872099996 | 0.745540023 | 0.321099997 |
| 0.253829986 | 0.499570012 | 0.318390012 |
| 0.876169980 | 0.249809995 | 0.322910011 |
| 0.246669993 | 0.998920023 | 0.323150009 |
| 0.499870002 | 0.997829974 | 0.323179990 |
| 0.998319983 | 0.999339998 | 0.313329995 |
| 0.005530000 | 0.497999996 | 0.314929992 |

**CH2CHO-H**

1.0

|               |              |               |
|---------------|--------------|---------------|
| 11.1216001511 | 0.0000000000 | 0.0000000000  |
| 0.0000000000  | 9.6316003799 | 0.0000000000  |
| 0.0000000000  | 0.0000000000 | 21.7964000702 |

| C | H | O | Pt |
|---|---|---|----|
| 9 | 4 | 8 | 64 |

Direct

|             |             |             |
|-------------|-------------|-------------|
| 0.008750000 | 0.657040000 | 0.379700005 |
| 0.143289998 | 0.102380000 | 0.381139994 |
| 0.377889991 | 0.901889980 | 0.382039994 |
| 0.864669979 | 0.068030000 | 0.381779999 |
| 0.553990006 | 0.149649993 | 0.385399997 |
| 0.735939980 | 0.741389990 | 0.387320012 |
| 0.811829984 | 0.389369994 | 0.386409998 |
| 0.275070012 | 0.460060000 | 0.415569991 |
| 0.395729989 | 0.483449996 | 0.441280007 |
| 0.252299994 | 0.667800009 | 0.352079988 |
| 0.251280010 | 0.351590008 | 0.427630007 |
| 0.209380001 | 0.524219990 | 0.440930009 |
| 0.402410001 | 0.487190008 | 0.492069989 |
| 0.492399991 | 0.496329993 | 0.413249999 |
| 0.015939999 | 0.651300013 | 0.434410006 |
| 0.143619999 | 0.109810002 | 0.435710013 |
| 0.857749999 | 0.061700001 | 0.436179996 |
| 0.371109992 | 0.893790007 | 0.436479986 |
| 0.547469974 | 0.164199993 | 0.439119995 |
| 0.733349979 | 0.739470005 | 0.441320002 |
| 0.809369981 | 0.397430003 | 0.440349996 |
| 0.000000000 | 0.000000000 | 0.000000000 |
| 0.000000000 | 0.500000000 | 0.000000000 |
| 0.125000000 | 0.250000000 | 0.000000000 |
| 0.125000000 | 0.750000000 | 0.000000000 |
| 0.250000000 | 0.000000000 | 0.000000000 |
| 0.250000000 | 0.500000000 | 0.000000000 |
| 0.375000000 | 0.250000000 | 0.000000000 |
| 0.375000000 | 0.750000000 | 0.000000000 |
| 0.500000000 | 0.000000000 | 0.000000000 |
| 0.500000000 | 0.500000000 | 0.000000000 |
| 0.625000000 | 0.250000000 | 0.000000000 |
| 0.625000000 | 0.750000000 | 0.000000000 |
| 0.750000000 | 0.000000000 | 0.000000000 |
| 0.750000000 | 0.500000000 | 0.000000000 |
| 0.875000000 | 0.250000000 | 0.000000000 |
| 0.875000000 | 0.750000000 | 0.000000000 |
| 0.000000000 | 0.166669995 | 0.103940003 |
| 0.000000000 | 0.666670024 | 0.103940003 |
| 0.125000000 | 0.416669995 | 0.103940003 |
| 0.125000000 | 0.916670024 | 0.103940003 |

|             |             |             |
|-------------|-------------|-------------|
| 0.250000000 | 0.166669995 | 0.103940003 |
| 0.250000000 | 0.666670024 | 0.103940003 |
| 0.375000000 | 0.416669995 | 0.103940003 |
| 0.375000000 | 0.916670024 | 0.103940003 |
| 0.500000000 | 0.166669995 | 0.103940003 |
| 0.500000000 | 0.666670024 | 0.103940003 |
| 0.625000000 | 0.416669995 | 0.103940003 |
| 0.625000000 | 0.916670024 | 0.103940003 |
| 0.750000000 | 0.166669995 | 0.103940003 |
| 0.750000000 | 0.666670024 | 0.103940003 |
| 0.875000000 | 0.416669995 | 0.103940003 |
| 0.875000000 | 0.916670024 | 0.103940003 |
| 0.501559973 | 0.334699988 | 0.205420002 |
| 0.248140007 | 0.335220009 | 0.206499994 |
| 0.374890000 | 0.077650003 | 0.206919998 |
| 0.624450028 | 0.078100003 | 0.207680002 |
| 0.876030028 | 0.582570016 | 0.207399994 |
| 0.753340006 | 0.831700027 | 0.207790002 |
| 0.749480009 | 0.328999996 | 0.207609996 |
| 0.125139996 | 0.080610000 | 0.207810000 |
| 0.247690007 | 0.831780016 | 0.208440006 |
| 0.877579987 | 0.085029997 | 0.208370000 |
| 0.374350011 | 0.584940016 | 0.208749995 |
| 0.626749992 | 0.582570016 | 0.208649993 |
| 0.126289994 | 0.582149982 | 0.208600000 |
| 0.998929977 | 0.332910001 | 0.209350005 |
| 0.502319992 | 0.832639992 | 0.209549993 |
| 0.998539984 | 0.833609998 | 0.210099995 |
| 0.375039995 | 0.250050008 | 0.305280000 |
| 0.754630029 | 0.999360025 | 0.311749995 |
| 0.127839997 | 0.249349996 | 0.313199997 |
| 0.502080023 | 0.500590026 | 0.312519997 |
| 0.621890008 | 0.246730000 | 0.312599987 |
| 0.749379992 | 0.492379993 | 0.313190013 |
| 0.378760010 | 0.751240015 | 0.314429998 |
| 0.627359986 | 0.748989999 | 0.315360010 |
| 0.122079998 | 0.749939978 | 0.315360010 |
| 0.004380000 | 0.496859998 | 0.314709991 |
| 0.250840008 | 0.999409974 | 0.317860007 |
| 0.254619986 | 0.489850014 | 0.321599990 |
| 0.001600000 | 0.002480000 | 0.320749998 |



|             |             |             |
|-------------|-------------|-------------|
| 0.873310030 | 0.746930003 | 0.322079986 |
| 0.503480017 | 0.999689996 | 0.323439986 |
| 0.875349998 | 0.250690013 | 0.322880000 |

**CH3CHO**

1.0

|               |              |               |
|---------------|--------------|---------------|
| 11.1216001511 | 0.0000000000 | 0.0000000000  |
| 0.0000000000  | 9.6316003799 | 0.0000000000  |
| 0.0000000000  | 0.0000000000 | 21.7964000702 |

|   |   |   |    |
|---|---|---|----|
| C | H | O | Pt |
| 9 | 4 | 8 | 64 |

Direct

|             |             |             |
|-------------|-------------|-------------|
| 0.058600001 | 0.627170026 | 0.384559989 |
| 0.197870001 | 0.145219997 | 0.386570007 |
| 0.375490010 | 0.888509989 | 0.383569986 |
| 0.875450015 | 0.063129999 | 0.379770011 |
| 0.545799971 | 0.148790002 | 0.385190010 |
| 0.745700002 | 0.733219981 | 0.383610010 |
| 0.815140009 | 0.386940002 | 0.386539996 |
| 0.332670003 | 0.477589995 | 0.462449998 |
| 0.464219987 | 0.493090004 | 0.461050004 |
| 0.294620007 | 0.468450010 | 0.415840000 |
| 0.308550000 | 0.385529995 | 0.489899993 |
| 0.293099999 | 0.568260014 | 0.485949993 |
| 0.512040019 | 0.498730004 | 0.505670011 |
| 0.529709995 | 0.501330018 | 0.415179998 |
| 0.058470000 | 0.625689983 | 0.438870013 |
| 0.206080005 | 0.156279996 | 0.440479994 |
| 0.873109996 | 0.053339999 | 0.434280008 |
| 0.374749988 | 0.878669977 | 0.438129991 |
| 0.537450016 | 0.165380001 | 0.438870013 |
| 0.747060001 | 0.729369998 | 0.437790006 |
| 0.812990010 | 0.395420015 | 0.440519989 |
| 0.000000000 | 0.000000000 | 0.000000000 |
| 0.000000000 | 0.500000000 | 0.000000000 |
| 0.125000000 | 0.250000000 | 0.000000000 |
| 0.125000000 | 0.750000000 | 0.000000000 |
| 0.250000000 | 0.000000000 | 0.000000000 |
| 0.250000000 | 0.500000000 | 0.000000000 |
| 0.375000000 | 0.250000000 | 0.000000000 |
| 0.375000000 | 0.750000000 | 0.000000000 |
| 0.500000000 | 0.000000000 | 0.000000000 |

|             |             |             |
|-------------|-------------|-------------|
| 0.500000000 | 0.500000000 | 0.000000000 |
| 0.625000000 | 0.250000000 | 0.000000000 |
| 0.625000000 | 0.750000000 | 0.000000000 |
| 0.750000000 | 0.000000000 | 0.000000000 |
| 0.750000000 | 0.500000000 | 0.000000000 |
| 0.875000000 | 0.250000000 | 0.000000000 |
| 0.875000000 | 0.750000000 | 0.000000000 |
| 0.000000000 | 0.166669995 | 0.103940003 |
| 0.000000000 | 0.666670024 | 0.103940003 |
| 0.125000000 | 0.416669995 | 0.103940003 |
| 0.125000000 | 0.916670024 | 0.103940003 |
| 0.250000000 | 0.166669995 | 0.103940003 |
| 0.250000000 | 0.666670024 | 0.103940003 |
| 0.375000000 | 0.416669995 | 0.103940003 |
| 0.375000000 | 0.916670024 | 0.103940003 |
| 0.500000000 | 0.166669995 | 0.103940003 |
| 0.500000000 | 0.666670024 | 0.103940003 |
| 0.625000000 | 0.416669995 | 0.103940003 |
| 0.625000000 | 0.916670024 | 0.103940003 |
| 0.750000000 | 0.166669995 | 0.103940003 |
| 0.750000000 | 0.666670024 | 0.103940003 |
| 0.875000000 | 0.416669995 | 0.103940003 |
| 0.875000000 | 0.916670024 | 0.103940003 |
| 0.500549972 | 0.333799988 | 0.206330001 |
| 0.248679996 | 0.331099987 | 0.205390006 |
| 0.374130011 | 0.077790000 | 0.207749993 |
| 0.622940004 | 0.079539999 | 0.208039999 |
| 0.875230014 | 0.580349982 | 0.207430005 |
| 0.750320017 | 0.833270013 | 0.206459999 |
| 0.749239981 | 0.328669995 | 0.208120003 |
| 0.125279993 | 0.079920001 | 0.208480000 |
| 0.247119993 | 0.833909988 | 0.210010007 |
| 0.875609994 | 0.085620001 | 0.207870007 |
| 0.377559990 | 0.586650014 | 0.207130000 |
| 0.627139986 | 0.582069993 | 0.208849996 |
| 0.123779997 | 0.583369970 | 0.205929995 |
| 0.000280000 | 0.331600010 | 0.210759997 |
| 0.501269996 | 0.833949983 | 0.210189998 |
| 0.997789979 | 0.831950009 | 0.209130004 |
| 0.374060005 | 0.251839995 | 0.307859987 |
| 0.751370013 | 0.999650002 | 0.312550008 |

|             |             |             |
|-------------|-------------|-------------|
| 0.127480000 | 0.248410001 | 0.316089988 |
| 0.498010010 | 0.500079989 | 0.314179987 |
| 0.620869994 | 0.245849997 | 0.313749999 |
| 0.750169992 | 0.490590006 | 0.313760012 |
| 0.374000013 | 0.746010005 | 0.315070003 |
| 0.625450015 | 0.747910023 | 0.315279990 |
| 0.123750001 | 0.746370018 | 0.316619992 |
| 0.006770000 | 0.497200012 | 0.316240013 |
| 0.246600002 | 0.996280015 | 0.323700011 |
| 0.253199995 | 0.497269988 | 0.308169991 |
| 0.998570025 | 0.996169984 | 0.314469993 |
| 0.871240020 | 0.746869981 | 0.315620005 |
| 0.499749988 | 0.996819973 | 0.323909998 |
| 0.876850009 | 0.248219997 | 0.322930008 |

### CH3CHO-H

1.0

|               |              |               |
|---------------|--------------|---------------|
| 11.1216001511 | 0.0000000000 | 0.0000000000  |
| 0.0000000000  | 9.6316003799 | 0.0000000000  |
| 0.0000000000  | 0.0000000000 | 21.7964000702 |

| C | H | O | Pt |
|---|---|---|----|
| 9 | 5 | 8 | 64 |

Direct

|             |             |             |
|-------------|-------------|-------------|
| 0.876020014 | 0.064659998 | 0.379759997 |
| 0.747399986 | 0.738259971 | 0.384110004 |
| 0.375519991 | 0.890829980 | 0.383850008 |
| 0.058189999 | 0.627770007 | 0.384600013 |
| 0.546549976 | 0.150729999 | 0.385109991 |
| 0.817179978 | 0.389319986 | 0.386619985 |
| 0.198609993 | 0.148939997 | 0.386440009 |
| 0.478500009 | 0.512239993 | 0.469440013 |
| 0.345800012 | 0.519529998 | 0.472640008 |
| 0.366950005 | 0.408879995 | 0.350270003 |
| 0.305290014 | 0.543259978 | 0.427929997 |
| 0.318370014 | 0.597199976 | 0.506929994 |
| 0.311960012 | 0.418199986 | 0.489019990 |
| 0.527989984 | 0.508610010 | 0.513750017 |
| 0.541289985 | 0.508260012 | 0.422719985 |
| 0.873880029 | 0.054740001 | 0.434260011 |
| 0.749300003 | 0.736129999 | 0.438279986 |
| 0.375730008 | 0.881179988 | 0.438410014 |
| 0.057510000 | 0.626659989 | 0.438899994 |

|             |             |             |
|-------------|-------------|-------------|
| 0.538999975 | 0.166329995 | 0.438859999 |
| 0.816479981 | 0.398000002 | 0.440569997 |
| 0.207379997 | 0.162259996 | 0.440219998 |
| 0.000000000 | 0.000000000 | 0.000000000 |
| 0.000000000 | 0.500000000 | 0.000000000 |
| 0.125000000 | 0.250000000 | 0.000000000 |
| 0.125000000 | 0.750000000 | 0.000000000 |
| 0.250000000 | 0.000000000 | 0.000000000 |
| 0.250000000 | 0.500000000 | 0.000000000 |
| 0.375000000 | 0.250000000 | 0.000000000 |
| 0.375000000 | 0.750000000 | 0.000000000 |
| 0.500000000 | 0.000000000 | 0.000000000 |
| 0.500000000 | 0.500000000 | 0.000000000 |
| 0.625000000 | 0.250000000 | 0.000000000 |
| 0.625000000 | 0.750000000 | 0.000000000 |
| 0.750000000 | 0.000000000 | 0.000000000 |
| 0.750000000 | 0.500000000 | 0.000000000 |
| 0.875000000 | 0.250000000 | 0.000000000 |
| 0.875000000 | 0.750000000 | 0.000000000 |
| 0.000000000 | 0.166669995 | 0.103940003 |
| 0.000000000 | 0.666670024 | 0.103940003 |
| 0.125000000 | 0.416669995 | 0.103940003 |
| 0.125000000 | 0.916670024 | 0.103940003 |
| 0.250000000 | 0.166669995 | 0.103940003 |
| 0.250000000 | 0.666670024 | 0.103940003 |
| 0.375000000 | 0.416669995 | 0.103940003 |
| 0.375000000 | 0.916670024 | 0.103940003 |
| 0.500000000 | 0.166669995 | 0.103940003 |
| 0.500000000 | 0.666670024 | 0.103940003 |
| 0.625000000 | 0.416669995 | 0.103940003 |
| 0.625000000 | 0.916670024 | 0.103940003 |
| 0.750000000 | 0.166669995 | 0.103940003 |
| 0.750000000 | 0.666670024 | 0.103940003 |
| 0.875000000 | 0.416669995 | 0.103940003 |
| 0.875000000 | 0.916670024 | 0.103940003 |
| 0.249449998 | 0.331209987 | 0.205899999 |
| 0.125119999 | 0.582570016 | 0.206129998 |
| 0.500289977 | 0.333719999 | 0.206770003 |
| 0.750530005 | 0.832669973 | 0.206520006 |
| 0.377480000 | 0.587249994 | 0.207509995 |
| 0.875490010 | 0.580160022 | 0.207369998 |

|             |             |             |
|-------------|-------------|-------------|
| 0.374190003 | 0.079360001 | 0.207859993 |
| 0.875569999 | 0.085359998 | 0.207739994 |
| 0.623179972 | 0.079350002 | 0.208140001 |
| 0.749180019 | 0.328700006 | 0.208000004 |
| 0.125249997 | 0.079700001 | 0.208389997 |
| 0.998220026 | 0.831239998 | 0.208969995 |
| 0.626760006 | 0.581879973 | 0.208949998 |
| 0.247449994 | 0.834640026 | 0.210060000 |
| 0.501489997 | 0.834399998 | 0.210079998 |
| 0.000270000 | 0.331499994 | 0.210649997 |
| 0.374280006 | 0.247600004 | 0.309630007 |
| 0.251179993 | 0.500039995 | 0.309219986 |
| 0.751890004 | 0.999920011 | 0.312570006 |
| 0.998549998 | 0.996100008 | 0.314289987 |
| 0.622709990 | 0.246360004 | 0.313600004 |
| 0.502390027 | 0.503960013 | 0.315329999 |
| 0.750819981 | 0.491510004 | 0.313760012 |
| 0.374909997 | 0.748799980 | 0.315070003 |
| 0.626439989 | 0.749310017 | 0.315829992 |
| 0.871720016 | 0.747319996 | 0.315640002 |
| 0.123709999 | 0.746749997 | 0.316489995 |
| 0.006010000 | 0.497689992 | 0.316199988 |
| 0.125599995 | 0.247240007 | 0.315239996 |
| 0.876730025 | 0.248579994 | 0.323009998 |
| 0.500840008 | 0.997389972 | 0.323920012 |
| 0.245989993 | 0.996179998 | 0.324470013 |

### CH3CHOH

1.0

|               |              |               |
|---------------|--------------|---------------|
| 11.1216001511 | 0.0000000000 | 0.0000000000  |
| 0.0000000000  | 9.6316003799 | 0.0000000000  |
| 0.0000000000  | 0.0000000000 | 21.7964000702 |

| C | H | O | Pt |
|---|---|---|----|
| 9 | 5 | 8 | 64 |

Direct

|             |             |             |
|-------------|-------------|-------------|
| 0.876290023 | 0.063759997 | 0.379000008 |
| 0.747789979 | 0.726769984 | 0.382149994 |
| 0.372579992 | 0.892620027 | 0.382030010 |
| 0.064240001 | 0.626969993 | 0.384539992 |
| 0.564400017 | 0.133169994 | 0.386790007 |
| 0.833019972 | 0.392659992 | 0.385729998 |
| 0.190490007 | 0.141749993 | 0.386590004 |

|             |             |             |
|-------------|-------------|-------------|
| 0.481290013 | 0.520030022 | 0.425969988 |
| 0.372049987 | 0.444209993 | 0.448670000 |
| 0.647119999 | 0.538699985 | 0.452769995 |
| 0.381209999 | 0.331369996 | 0.443760008 |
| 0.289869994 | 0.479319990 | 0.425359994 |
| 0.362089992 | 0.467290014 | 0.498050004 |
| 0.474720001 | 0.633840024 | 0.428429991 |
| 0.582849979 | 0.468719989 | 0.452760011 |
| 0.873470008 | 0.054159999 | 0.433459997 |
| 0.746819973 | 0.717090011 | 0.436650008 |
| 0.373780012 | 0.883159995 | 0.436589986 |
| 0.065669999 | 0.625440001 | 0.438749999 |
| 0.565590024 | 0.136920005 | 0.440849990 |
| 0.839619994 | 0.403699994 | 0.439630002 |
| 0.193770006 | 0.148819998 | 0.440629989 |
| 0.000000000 | 0.000000000 | 0.000000000 |
| 0.000000000 | 0.500000000 | 0.000000000 |
| 0.125000000 | 0.250000000 | 0.000000000 |
| 0.125000000 | 0.750000000 | 0.000000000 |
| 0.250000000 | 0.000000000 | 0.000000000 |
| 0.250000000 | 0.500000000 | 0.000000000 |
| 0.375000000 | 0.250000000 | 0.000000000 |
| 0.375000000 | 0.750000000 | 0.000000000 |
| 0.500000000 | 0.000000000 | 0.000000000 |
| 0.500000000 | 0.500000000 | 0.000000000 |
| 0.625000000 | 0.250000000 | 0.000000000 |
| 0.625000000 | 0.750000000 | 0.000000000 |
| 0.750000000 | 0.000000000 | 0.000000000 |
| 0.750000000 | 0.500000000 | 0.000000000 |
| 0.875000000 | 0.250000000 | 0.000000000 |
| 0.875000000 | 0.750000000 | 0.000000000 |
| 0.000000000 | 0.166669995 | 0.103940003 |
| 0.000000000 | 0.666670024 | 0.103940003 |
| 0.125000000 | 0.416669995 | 0.103940003 |
| 0.125000000 | 0.916670024 | 0.103940003 |
| 0.250000000 | 0.166669995 | 0.103940003 |
| 0.250000000 | 0.666670024 | 0.103940003 |
| 0.375000000 | 0.416669995 | 0.103940003 |
| 0.375000000 | 0.916670024 | 0.103940003 |
| 0.500000000 | 0.166669995 | 0.103940003 |
| 0.500000000 | 0.666670024 | 0.103940003 |

|             |             |             |
|-------------|-------------|-------------|
| 0.625000000 | 0.416669995 | 0.103940003 |
| 0.625000000 | 0.916670024 | 0.103940003 |
| 0.750000000 | 0.166669995 | 0.103940003 |
| 0.750000000 | 0.666670024 | 0.103940003 |
| 0.875000000 | 0.416669995 | 0.103940003 |
| 0.875000000 | 0.916670024 | 0.103940003 |
| 0.249129996 | 0.331640005 | 0.205280006 |
| 0.124490000 | 0.583039999 | 0.206090003 |
| 0.501709998 | 0.335700005 | 0.207420006 |
| 0.750069976 | 0.832849979 | 0.206389993 |
| 0.378960013 | 0.585929990 | 0.207300007 |
| 0.874539971 | 0.580349982 | 0.207870007 |
| 0.374779999 | 0.079099998 | 0.207870007 |
| 0.876010001 | 0.086209998 | 0.207399994 |
| 0.623440027 | 0.081479996 | 0.208069995 |
| 0.749220014 | 0.330110013 | 0.208700001 |
| 0.125650004 | 0.080130003 | 0.208289996 |
| 0.998139977 | 0.831489980 | 0.208910003 |
| 0.626190007 | 0.580690026 | 0.210240006 |
| 0.247940004 | 0.833809972 | 0.209570006 |
| 0.502129972 | 0.833599985 | 0.209490001 |
| 0.000550000 | 0.332650006 | 0.210519999 |
| 0.376419991 | 0.254999995 | 0.307370007 |
| 0.256419986 | 0.498879999 | 0.307880014 |
| 0.751999974 | 0.000130000 | 0.311549991 |
| 0.999270022 | 0.996249974 | 0.313800007 |
| 0.620150030 | 0.247879997 | 0.315890014 |
| 0.497599989 | 0.500069976 | 0.326040000 |
| 0.748369992 | 0.490630001 | 0.315800011 |
| 0.375930011 | 0.746720016 | 0.313930005 |
| 0.624949992 | 0.745559990 | 0.315380007 |
| 0.872080028 | 0.747479975 | 0.315380007 |
| 0.125489995 | 0.746930003 | 0.315950006 |
| 0.008000000 | 0.498389989 | 0.316219985 |
| 0.129030004 | 0.249689996 | 0.315450013 |
| 0.877799988 | 0.248249993 | 0.321660012 |
| 0.501179993 | 0.997430027 | 0.321969986 |
| 0.247850001 | 0.998250008 | 0.322649986 |

**CH3CHOH-H**

1.0

|               |              |              |
|---------------|--------------|--------------|
| 11.1216001511 | 0.0000000000 | 0.0000000000 |
|---------------|--------------|--------------|

|             |              |              |               |
|-------------|--------------|--------------|---------------|
|             | 0.0000000000 | 9.6316003799 | 0.0000000000  |
|             | 0.0000000000 | 0.0000000000 | 21.7964000702 |
| C           | H            | O            | Pt            |
| 9           | 6            | 8            | 64            |
| Direct      |              |              |               |
| 0.878369987 | 0.064680003  | 0.378930002  |               |
| 0.373829991 | 0.893429995  | 0.382380009  |               |
| 0.749589980 | 0.730849981  | 0.382519990  |               |
| 0.062479999 | 0.628589988  | 0.384469986  |               |
| 0.831399977 | 0.392879993  | 0.385720015  |               |
| 0.198109999 | 0.148379996  | 0.386020005  |               |
| 0.570630014 | 0.131150007  | 0.386460006  |               |
| 0.493519992 | 0.545729995  | 0.434940010  |               |
| 0.371399999 | 0.512499988  | 0.460429996  |               |
| 0.412220001 | 0.370209992  | 0.365159988  |               |
| 0.299989998 | 0.566070020  | 0.435169995  |               |
| 0.515540004 | 0.656809986  | 0.433369994  |               |
| 0.353839993 | 0.400279999  | 0.460900009  |               |
| 0.659290016 | 0.509190023  | 0.458240002  |               |
| 0.369399995 | 0.549589992  | 0.508310020  |               |
| 0.874620020 | 0.054380000  | 0.433360010  |               |
| 0.375090003 | 0.884360015  | 0.436969995  |               |
| 0.749189973 | 0.723569989  | 0.436989993  |               |
| 0.062660001 | 0.628040016  | 0.438710004  |               |
| 0.835380018 | 0.403470010  | 0.439870000  |               |
| 0.574469984 | 0.135399997  | 0.440459996  |               |
| 0.205320001 | 0.158940002  | 0.439880013  |               |
| 0.579670012 | 0.465990007  | 0.461739987  |               |
| 0.000000000 | 0.000000000  | 0.000000000  |               |
| 0.000000000 | 0.500000000  | 0.000000000  |               |
| 0.125000000 | 0.250000000  | 0.000000000  |               |
| 0.125000000 | 0.750000000  | 0.000000000  |               |
| 0.250000000 | 0.000000000  | 0.000000000  |               |
| 0.250000000 | 0.500000000  | 0.000000000  |               |
| 0.375000000 | 0.250000000  | 0.000000000  |               |
| 0.375000000 | 0.750000000  | 0.000000000  |               |
| 0.500000000 | 0.000000000  | 0.000000000  |               |
| 0.500000000 | 0.500000000  | 0.000000000  |               |
| 0.625000000 | 0.250000000  | 0.000000000  |               |
| 0.625000000 | 0.750000000  | 0.000000000  |               |
| 0.750000000 | 0.000000000  | 0.000000000  |               |



|             |             |             |
|-------------|-------------|-------------|
| 0.750000000 | 0.500000000 | 0.000000000 |
| 0.875000000 | 0.250000000 | 0.000000000 |
| 0.875000000 | 0.750000000 | 0.000000000 |
| 0.000000000 | 0.166669995 | 0.103940003 |
| 0.000000000 | 0.666670024 | 0.103940003 |
| 0.125000000 | 0.416669995 | 0.103940003 |
| 0.125000000 | 0.916670024 | 0.103940003 |
| 0.250000000 | 0.166669995 | 0.103940003 |
| 0.250000000 | 0.666670024 | 0.103940003 |
| 0.375000000 | 0.416669995 | 0.103940003 |
| 0.375000000 | 0.916670024 | 0.103940003 |
| 0.500000000 | 0.166669995 | 0.103940003 |
| 0.500000000 | 0.666670024 | 0.103940003 |
| 0.625000000 | 0.416669995 | 0.103940003 |
| 0.625000000 | 0.916670024 | 0.103940003 |
| 0.750000000 | 0.166669995 | 0.103940003 |
| 0.750000000 | 0.666670024 | 0.103940003 |
| 0.875000000 | 0.416669995 | 0.103940003 |
| 0.875000000 | 0.916670024 | 0.103940003 |
| 0.249939993 | 0.332060009 | 0.205369994 |
| 0.125039995 | 0.583010018 | 0.206110001 |
| 0.750000000 | 0.832310021 | 0.206379995 |
| 0.380030006 | 0.586359978 | 0.207680002 |
| 0.876739979 | 0.086470000 | 0.207190007 |
| 0.374769986 | 0.080729999 | 0.208430007 |
| 0.501850009 | 0.336510003 | 0.207760006 |
| 0.623660028 | 0.081670001 | 0.207800001 |
| 0.874339998 | 0.580200016 | 0.207839996 |
| 0.126049995 | 0.080169998 | 0.208330005 |
| 0.749530017 | 0.330480009 | 0.208560005 |
| 0.998459995 | 0.831219971 | 0.208859995 |
| 0.502300024 | 0.834200025 | 0.209460005 |
| 0.248610005 | 0.834249973 | 0.209549993 |
| 0.000850000 | 0.332980007 | 0.210529998 |
| 0.625400007 | 0.580150008 | 0.210979998 |
| 0.377350003 | 0.254480004 | 0.308360010 |
| 0.255950004 | 0.501879990 | 0.307159990 |
| 0.753840029 | 0.000530000 | 0.310880005 |
| 0.000570000 | 0.996730030 | 0.313789994 |
| 0.376549989 | 0.748369992 | 0.314000010 |
| 0.129030004 | 0.250530005 | 0.314990014 |

|             |             |             |
|-------------|-------------|-------------|
| 0.126049995 | 0.747829974 | 0.316009998 |
| 0.872759998 | 0.748260021 | 0.315210015 |
| 0.007940000 | 0.499240011 | 0.316359997 |
| 0.625899971 | 0.745800018 | 0.315450013 |
| 0.748899996 | 0.491589993 | 0.316009998 |
| 0.622959971 | 0.246840000 | 0.314830005 |
| 0.502849996 | 0.997380018 | 0.322210014 |
| 0.878809988 | 0.249109998 | 0.321929991 |
| 0.248620003 | 0.998820007 | 0.323069990 |
| 0.499749988 | 0.505460024 | 0.334989995 |

**CH3CH2OH**

1.0

|               |              |               |
|---------------|--------------|---------------|
| 11.1216001511 | 0.0000000000 | 0.0000000000  |
| 0.0000000000  | 9.6316003799 | 0.0000000000  |
| 0.0000000000  | 0.0000000000 | 21.7964000702 |

| C | H | O | Pt |
|---|---|---|----|
| 9 | 6 | 8 | 64 |

Direct

|             |             |             |
|-------------|-------------|-------------|
| 0.875249982 | 0.062799998 | 0.379629999 |
| 0.374300003 | 0.893930018 | 0.382809997 |
| 0.746890008 | 0.727999985 | 0.382880002 |
| 0.062070001 | 0.625249982 | 0.384959996 |
| 0.817650020 | 0.386700004 | 0.386370003 |
| 0.183170006 | 0.134580001 | 0.387180001 |
| 0.556280017 | 0.142030001 | 0.385919988 |
| 0.426420003 | 0.532400012 | 0.463999987 |
| 0.326409996 | 0.427740008 | 0.462610006 |
| 0.394970000 | 0.637700021 | 0.452960014 |
| 0.256720006 | 0.455619991 | 0.496109992 |
| 0.471049994 | 0.534550011 | 0.509130001 |
| 0.282539994 | 0.426600009 | 0.416970015 |
| 0.591440022 | 0.546649992 | 0.428020000 |
| 0.359140009 | 0.322629988 | 0.472510010 |
| 0.872929990 | 0.053119998 | 0.434100002 |
| 0.374020010 | 0.887019992 | 0.437500000 |
| 0.744949996 | 0.717999995 | 0.437229991 |
| 0.062639996 | 0.623539984 | 0.439190000 |
| 0.815230012 | 0.395729989 | 0.440400004 |
| 0.553430021 | 0.152999997 | 0.439830005 |
| 0.181569993 | 0.138150007 | 0.441289991 |
| 0.519469976 | 0.491120011 | 0.419800013 |

|             |             |             |
|-------------|-------------|-------------|
| 0.000000000 | 0.000000000 | 0.000000000 |
| 0.000000000 | 0.500000000 | 0.000000000 |
| 0.125000000 | 0.250000000 | 0.000000000 |
| 0.125000000 | 0.750000000 | 0.000000000 |
| 0.250000000 | 0.000000000 | 0.000000000 |
| 0.250000000 | 0.500000000 | 0.000000000 |
| 0.375000000 | 0.250000000 | 0.000000000 |
| 0.375000000 | 0.750000000 | 0.000000000 |
| 0.500000000 | 0.000000000 | 0.000000000 |
| 0.500000000 | 0.500000000 | 0.000000000 |
| 0.625000000 | 0.250000000 | 0.000000000 |
| 0.625000000 | 0.750000000 | 0.000000000 |
| 0.750000000 | 0.000000000 | 0.000000000 |
| 0.750000000 | 0.500000000 | 0.000000000 |
| 0.875000000 | 0.250000000 | 0.000000000 |
| 0.875000000 | 0.750000000 | 0.000000000 |
| 0.000000000 | 0.166669995 | 0.103940003 |
| 0.000000000 | 0.666670024 | 0.103940003 |
| 0.125000000 | 0.416669995 | 0.103940003 |
| 0.125000000 | 0.916670024 | 0.103940003 |
| 0.250000000 | 0.166669995 | 0.103940003 |
| 0.250000000 | 0.666670024 | 0.103940003 |
| 0.375000000 | 0.416669995 | 0.103940003 |
| 0.375000000 | 0.916670024 | 0.103940003 |
| 0.500000000 | 0.166669995 | 0.103940003 |
| 0.500000000 | 0.666670024 | 0.103940003 |
| 0.625000000 | 0.416669995 | 0.103940003 |
| 0.625000000 | 0.916670024 | 0.103940003 |
| 0.750000000 | 0.166669995 | 0.103940003 |
| 0.750000000 | 0.666670024 | 0.103940003 |
| 0.875000000 | 0.416669995 | 0.103940003 |
| 0.875000000 | 0.916670024 | 0.103940003 |
| 0.248500004 | 0.331490010 | 0.205410004 |
| 0.124119997 | 0.583060026 | 0.206159994 |
| 0.750509977 | 0.833029985 | 0.206489995 |
| 0.377490014 | 0.586489975 | 0.207249999 |
| 0.875869989 | 0.085610002 | 0.207770005 |
| 0.374260008 | 0.077569999 | 0.207609996 |
| 0.501089990 | 0.333810002 | 0.206180006 |
| 0.623350024 | 0.079630002 | 0.207890004 |
| 0.875400007 | 0.580349982 | 0.207619995 |

|             |             |             |
|-------------|-------------|-------------|
| 0.125340000 | 0.079719998 | 0.208279997 |
| 0.749549985 | 0.329050004 | 0.208100006 |
| 0.998030007 | 0.831409991 | 0.209209993 |
| 0.501359999 | 0.833620012 | 0.210069999 |
| 0.247459993 | 0.833350003 | 0.209979996 |
| 0.000380000 | 0.331779987 | 0.210749999 |
| 0.627260029 | 0.582009971 | 0.208820000 |
| 0.374630004 | 0.252180010 | 0.307000011 |
| 0.254500002 | 0.496969998 | 0.308919996 |
| 0.751789987 | 0.999149978 | 0.312290013 |
| 0.998549998 | 0.995469987 | 0.314229995 |
| 0.374890000 | 0.746349990 | 0.315589994 |
| 0.128250003 | 0.247779995 | 0.316069990 |
| 0.124559999 | 0.745500028 | 0.316729993 |
| 0.871819973 | 0.746840000 | 0.315899998 |
| 0.007540000 | 0.496859998 | 0.316469997 |
| 0.625339985 | 0.747269988 | 0.315439999 |
| 0.750050008 | 0.490599990 | 0.314130008 |
| 0.621029973 | 0.245940000 | 0.313840002 |
| 0.500609994 | 0.997470021 | 0.322930008 |
| 0.877340019 | 0.248060003 | 0.322719991 |
| 0.247030005 | 0.996590018 | 0.322829992 |
| 0.498829991 | 0.499890000 | 0.314260006 |

**TS1**

1.0

|               |              |               |
|---------------|--------------|---------------|
| 11.1216001511 | 0.0000000000 | 0.0000000000  |
| 0.0000000000  | 9.6316003799 | 0.0000000000  |
| 0.0000000000  | 0.0000000000 | 21.7964000702 |

C H O Pt  
8 1 9 64

Direct

|             |             |             |
|-------------|-------------|-------------|
| 0.875199974 | 0.087140001 | 0.385190010 |
| 0.860490024 | 0.414370000 | 0.382110000 |
| 0.755699992 | 0.724799991 | 0.382220000 |
| 0.604330003 | 0.993690014 | 0.387140006 |
| 0.138510004 | 0.977469981 | 0.386940002 |
| 0.443450004 | 0.632839978 | 0.384039998 |
| 0.079389997 | 0.624480009 | 0.386839986 |
| 0.375259995 | 0.273380011 | 0.420240015 |
| 0.565980017 | 0.277249992 | 0.384059995 |
| 0.873849988 | 0.088409998 | 0.439570010 |

|             |             |             |
|-------------|-------------|-------------|
| 0.855899990 | 0.419919997 | 0.436450005 |
| 0.753679991 | 0.718159974 | 0.436250001 |
| 0.604520023 | 0.987550020 | 0.440979987 |
| 0.140939996 | 0.968850017 | 0.440780014 |
| 0.446040004 | 0.632700026 | 0.438149989 |
| 0.087320000 | 0.623700023 | 0.440640002 |
| 0.480599999 | 0.276919991 | 0.438400000 |
| 0.272060007 | 0.278629988 | 0.437240005 |
| 0.000000000 | 0.000000000 | 0.000000000 |
| 0.000000000 | 0.500000000 | 0.000000000 |
| 0.125000000 | 0.250000000 | 0.000000000 |
| 0.125000000 | 0.750000000 | 0.000000000 |
| 0.250000000 | 0.000000000 | 0.000000000 |
| 0.250000000 | 0.500000000 | 0.000000000 |
| 0.375000000 | 0.250000000 | 0.000000000 |
| 0.375000000 | 0.750000000 | 0.000000000 |
| 0.500000000 | 0.000000000 | 0.000000000 |
| 0.500000000 | 0.500000000 | 0.000000000 |
| 0.625000000 | 0.250000000 | 0.000000000 |
| 0.625000000 | 0.750000000 | 0.000000000 |
| 0.750000000 | 0.000000000 | 0.000000000 |
| 0.750000000 | 0.500000000 | 0.000000000 |
| 0.875000000 | 0.250000000 | 0.000000000 |
| 0.875000000 | 0.750000000 | 0.000000000 |
| 0.000000000 | 0.166669995 | 0.103940003 |
| 0.000000000 | 0.666670024 | 0.103940003 |
| 0.125000000 | 0.416669995 | 0.103940003 |
| 0.125000000 | 0.916670024 | 0.103940003 |
| 0.250000000 | 0.166669995 | 0.103940003 |
| 0.250000000 | 0.666670024 | 0.103940003 |
| 0.375000000 | 0.416669995 | 0.103940003 |
| 0.375000000 | 0.916670024 | 0.103940003 |
| 0.500000000 | 0.166669995 | 0.103940003 |
| 0.500000000 | 0.666670024 | 0.103940003 |
| 0.625000000 | 0.416669995 | 0.103940003 |
| 0.625000000 | 0.916670024 | 0.103940003 |
| 0.750000000 | 0.166669995 | 0.103940003 |
| 0.750000000 | 0.666670024 | 0.103940003 |
| 0.875000000 | 0.416669995 | 0.103940003 |
| 0.875000000 | 0.916670024 | 0.103940003 |
| 0.251130015 | 0.330139995 | 0.205119997 |

|             |             |             |
|-------------|-------------|-------------|
| 0.750159979 | 0.837670028 | 0.207300007 |
| 0.375519991 | 0.583339989 | 0.206009999 |
| 0.498979986 | 0.334699988 | 0.207699999 |
| 0.121660002 | 0.582700014 | 0.206630006 |
| 0.874859989 | 0.084100001 | 0.211170003 |
| 0.374949992 | 0.078520000 | 0.209419996 |
| 0.625379980 | 0.084909998 | 0.207920000 |
| 0.123580001 | 0.080150001 | 0.206949994 |
| 0.874719977 | 0.583840013 | 0.207900003 |
| 0.750630021 | 0.332520008 | 0.207870007 |
| 0.626619995 | 0.582910001 | 0.207890004 |
| 0.998149991 | 0.834670007 | 0.210030004 |
| 0.501850009 | 0.832069993 | 0.208509997 |
| 0.997739971 | 0.334850013 | 0.208790004 |
| 0.249400005 | 0.830009997 | 0.209250003 |
| 0.249290004 | 0.495429993 | 0.307509989 |
| 0.371069998 | 0.251080006 | 0.316709995 |
| 0.744379997 | 0.011650000 | 0.321429998 |
| 0.001610000 | 0.003330000 | 0.322499990 |
| 0.747669995 | 0.495240003 | 0.314720005 |
| 0.872919977 | 0.754760027 | 0.313679993 |
| 0.627950013 | 0.749629974 | 0.314639986 |
| 0.129050002 | 0.252149999 | 0.308349997 |
| 0.615379989 | 0.257990003 | 0.313300014 |
| 0.496309996 | 0.502300024 | 0.315640002 |
| 0.125909999 | 0.745509982 | 0.315660000 |
| 0.495680004 | 0.003110000 | 0.315640002 |
| 0.876510024 | 0.251340002 | 0.319559991 |
| 0.251120001 | 0.999350011 | 0.316300005 |
| 0.374260008 | 0.749849975 | 0.316119999 |
| 0.002330000 | 0.499879986 | 0.321269989 |

**TS2**

1.0

|               |              |               |
|---------------|--------------|---------------|
| 11.1216001511 | 0.0000000000 | 0.0000000000  |
| 0.0000000000  | 9.6316003799 | 0.0000000000  |
| 0.0000000000  | 0.0000000000 | 21.7964000702 |

| C | H | O | Pt |
|---|---|---|----|
| 8 | 2 | 9 | 64 |

Direct

|             |             |             |
|-------------|-------------|-------------|
| 0.621140003 | 0.434489995 | 0.378989995 |
| 0.875209987 | 0.085759997 | 0.376060009 |

|             |             |             |
|-------------|-------------|-------------|
| 0.560930014 | 0.114940003 | 0.386330009 |
| 0.170359999 | 0.127619997 | 0.387479991 |
| 0.731459975 | 0.749580026 | 0.387989998 |
| 0.012540000 | 0.744899988 | 0.388669997 |
| 0.338990003 | 0.871490002 | 0.387360007 |
| 0.269230008 | 0.499150008 | 0.412380010 |
| 0.367370009 | 0.307520002 | 0.385729998 |
| 0.381900012 | 0.389189988 | 0.469209999 |
| 0.616479993 | 0.439590007 | 0.433809996 |
| 0.875190020 | 0.080270000 | 0.430729985 |
| 0.558719993 | 0.112470001 | 0.440450013 |
| 0.159649998 | 0.127859995 | 0.441300005 |
| 0.725220025 | 0.752110004 | 0.441879988 |
| 0.017519999 | 0.749979973 | 0.442519993 |
| 0.349330008 | 0.874310017 | 0.441100001 |
| 0.244320005 | 0.581979990 | 0.451189995 |
| 0.329540014 | 0.371039987 | 0.433519989 |
| 0.000000000 | 0.000000000 | 0.000000000 |
| 0.000000000 | 0.500000000 | 0.000000000 |
| 0.125000000 | 0.250000000 | 0.000000000 |
| 0.125000000 | 0.750000000 | 0.000000000 |
| 0.250000000 | 0.000000000 | 0.000000000 |
| 0.250000000 | 0.500000000 | 0.000000000 |
| 0.375000000 | 0.250000000 | 0.000000000 |
| 0.375000000 | 0.750000000 | 0.000000000 |
| 0.500000000 | 0.000000000 | 0.000000000 |
| 0.500000000 | 0.500000000 | 0.000000000 |
| 0.625000000 | 0.250000000 | 0.000000000 |
| 0.625000000 | 0.750000000 | 0.000000000 |
| 0.750000000 | 0.000000000 | 0.000000000 |
| 0.750000000 | 0.500000000 | 0.000000000 |
| 0.875000000 | 0.250000000 | 0.000000000 |
| 0.875000000 | 0.750000000 | 0.000000000 |
| 0.000000000 | 0.166669995 | 0.103940003 |
| 0.000000000 | 0.666670024 | 0.103940003 |
| 0.125000000 | 0.416669995 | 0.103940003 |
| 0.125000000 | 0.916670024 | 0.103940003 |
| 0.250000000 | 0.166669995 | 0.103940003 |
| 0.250000000 | 0.666670024 | 0.103940003 |
| 0.375000000 | 0.416669995 | 0.103940003 |
| 0.375000000 | 0.916670024 | 0.103940003 |

|             |             |             |
|-------------|-------------|-------------|
| 0.500000000 | 0.166669995 | 0.103940003 |
| 0.500000000 | 0.666670024 | 0.103940003 |
| 0.625000000 | 0.416669995 | 0.103940003 |
| 0.625000000 | 0.916670024 | 0.103940003 |
| 0.750000000 | 0.166669995 | 0.103940003 |
| 0.750000000 | 0.666670024 | 0.103940003 |
| 0.875000000 | 0.416669995 | 0.103940003 |
| 0.875000000 | 0.916670024 | 0.103940003 |
| 0.501030028 | 0.334109992 | 0.206770003 |
| 0.625670016 | 0.584490001 | 0.207039997 |
| 0.250149995 | 0.334630013 | 0.207300007 |
| 0.876519978 | 0.082610004 | 0.205720007 |
| 0.374210000 | 0.079879999 | 0.207949996 |
| 0.625689983 | 0.084700003 | 0.207320005 |
| 0.752799988 | 0.832149982 | 0.208059996 |
| 0.998489976 | 0.829289973 | 0.207920000 |
| 0.127859995 | 0.080320001 | 0.208560005 |
| 0.002300000 | 0.329490006 | 0.207159996 |
| 0.749119997 | 0.331539989 | 0.208480000 |
| 0.873430014 | 0.581480026 | 0.208690003 |
| 0.501439989 | 0.834249973 | 0.209160000 |
| 0.374960005 | 0.585179985 | 0.209910005 |
| 0.248119995 | 0.832920015 | 0.209830001 |
| 0.127719998 | 0.582140028 | 0.208710000 |
| 0.374949992 | 0.255369991 | 0.309210002 |
| 0.752629995 | 0.492790014 | 0.315710008 |
| 0.753610015 | 0.002440000 | 0.311589986 |
| 0.998600006 | 0.999530017 | 0.311509997 |
| 0.501200020 | 0.505370021 | 0.313499987 |
| 0.127629995 | 0.250310004 | 0.316700011 |
| 0.626559973 | 0.753660023 | 0.314350009 |
| 0.503269970 | 0.002970000 | 0.315050006 |
| 0.000560000 | 0.491739988 | 0.309760004 |
| 0.120329998 | 0.746209979 | 0.315510005 |
| 0.375169992 | 0.750649989 | 0.315750003 |
| 0.878849983 | 0.251150012 | 0.315380007 |
| 0.624029994 | 0.249500006 | 0.320859998 |
| 0.250990003 | 0.501730025 | 0.321960002 |
| 0.873570025 | 0.743529975 | 0.325470001 |
| 0.248830006 | 0.998250008 | 0.324149996 |



1.0

|               |              |               |
|---------------|--------------|---------------|
| 11.1216001511 | 0.0000000000 | 0.0000000000  |
| 0.0000000000  | 9.6316003799 | 0.0000000000  |
| 0.0000000000  | 0.0000000000 | 21.7964000702 |

|   |   |   |    |
|---|---|---|----|
| C | H | O | Pt |
| 8 | 1 | 8 | 64 |

Direct

|             |             |             |
|-------------|-------------|-------------|
| 0.577210009 | 0.113150001 | 0.382820010 |
| 0.877309978 | 0.069739997 | 0.378659993 |
| 0.385259986 | 0.330940008 | 0.400319993 |
| 0.861320019 | 0.409289986 | 0.382140011 |
| 0.754440010 | 0.741779983 | 0.384499997 |
| 0.457329988 | 0.669139981 | 0.384600013 |
| 0.171969995 | 0.108250000 | 0.384719998 |
| 0.076700002 | 0.628970027 | 0.387989998 |
| 0.480690002 | 0.409429997 | 0.392080009 |
| 0.586080015 | 0.114399999 | 0.436850011 |
| 0.874719977 | 0.061620001 | 0.433050007 |
| 0.855000019 | 0.411579996 | 0.436549991 |
| 0.757309973 | 0.739480019 | 0.438540012 |
| 0.462819993 | 0.668640018 | 0.438730001 |
| 0.337449998 | 0.334630013 | 0.448659986 |
| 0.162680000 | 0.105010003 | 0.438620001 |
| 0.082819998 | 0.629700005 | 0.441920012 |
| 0.000000000 | 0.000000000 | 0.000000000 |
| 0.000000000 | 0.500000000 | 0.000000000 |
| 0.125000000 | 0.250000000 | 0.000000000 |
| 0.125000000 | 0.750000000 | 0.000000000 |
| 0.250000000 | 0.000000000 | 0.000000000 |
| 0.250000000 | 0.500000000 | 0.000000000 |
| 0.375000000 | 0.250000000 | 0.000000000 |
| 0.375000000 | 0.750000000 | 0.000000000 |
| 0.500000000 | 0.000000000 | 0.000000000 |
| 0.500000000 | 0.500000000 | 0.000000000 |
| 0.625000000 | 0.250000000 | 0.000000000 |
| 0.625000000 | 0.750000000 | 0.000000000 |
| 0.750000000 | 0.000000000 | 0.000000000 |
| 0.750000000 | 0.500000000 | 0.000000000 |
| 0.875000000 | 0.250000000 | 0.000000000 |
| 0.875000000 | 0.750000000 | 0.000000000 |
| 0.000000000 | 0.166669995 | 0.103940003 |

|             |             |             |
|-------------|-------------|-------------|
| 0.00000000  | 0.666670024 | 0.103940003 |
| 0.125000000 | 0.416669995 | 0.103940003 |
| 0.125000000 | 0.916670024 | 0.103940003 |
| 0.250000000 | 0.166669995 | 0.103940003 |
| 0.250000000 | 0.666670024 | 0.103940003 |
| 0.375000000 | 0.416669995 | 0.103940003 |
| 0.375000000 | 0.916670024 | 0.103940003 |
| 0.500000000 | 0.166669995 | 0.103940003 |
| 0.500000000 | 0.666670024 | 0.103940003 |
| 0.625000000 | 0.416669995 | 0.103940003 |
| 0.625000000 | 0.916670024 | 0.103940003 |
| 0.750000000 | 0.166669995 | 0.103940003 |
| 0.750000000 | 0.666670024 | 0.103940003 |
| 0.875000000 | 0.416669995 | 0.103940003 |
| 0.875000000 | 0.916670024 | 0.103940003 |
| 0.125070006 | 0.080380000 | 0.207369998 |
| 0.749109983 | 0.832170010 | 0.206550002 |
| 0.249850005 | 0.329459995 | 0.206839994 |
| 0.749880016 | 0.331110001 | 0.207719997 |
| 0.625230014 | 0.581409991 | 0.209979996 |
| 0.377339989 | 0.583440006 | 0.207059994 |
| 0.876580000 | 0.085670002 | 0.206829995 |
| 0.875010014 | 0.580560029 | 0.208000004 |
| 0.624440014 | 0.082670003 | 0.206760004 |
| 0.122299999 | 0.581849992 | 0.206430003 |
| 0.999000013 | 0.831110001 | 0.208660007 |
| 0.499700010 | 0.334729999 | 0.208120003 |
| 0.501510024 | 0.833940029 | 0.209150001 |
| 0.000920000 | 0.333829999 | 0.210490003 |
| 0.374639988 | 0.083169997 | 0.209529996 |
| 0.250270009 | 0.832009971 | 0.209749997 |
| 0.248930007 | 0.498310000 | 0.306899995 |
| 0.999830008 | 0.993650019 | 0.314060003 |
| 0.872979999 | 0.747650027 | 0.314229995 |
| 0.128069997 | 0.244519994 | 0.316529989 |
| 0.624469995 | 0.246439993 | 0.313439995 |
| 0.627650023 | 0.751439989 | 0.317889988 |
| 0.751450002 | 0.491549999 | 0.314379990 |
| 0.500299990 | 0.999620020 | 0.316830009 |
| 0.503030002 | 0.502200007 | 0.321940005 |
| 0.126149997 | 0.745980024 | 0.316610008 |

|             |             |             |
|-------------|-------------|-------------|
| 0.373320013 | 0.753629982 | 0.314669997 |
| 0.878759980 | 0.246490002 | 0.318760008 |
| 0.249029994 | 0.994769990 | 0.317990005 |
| 0.753400028 | 0.000810000 | 0.311219990 |
| 0.372729987 | 0.253839999 | 0.316579998 |
| 0.004490000 | 0.496939987 | 0.323060006 |

**TS4**

1.0

|               |              |               |
|---------------|--------------|---------------|
| 11.1216001511 | 0.0000000000 | 0.0000000000  |
| 0.0000000000  | 9.6316003799 | 0.0000000000  |
| 0.0000000000  | 0.0000000000 | 21.7964000702 |

| C | H | O | Pt |
|---|---|---|----|
| 8 | 2 | 8 | 64 |

Direct

|             |             |             |
|-------------|-------------|-------------|
| 0.879029989 | 0.071780004 | 0.378919989 |
| 0.861949980 | 0.411159992 | 0.381749988 |
| 0.578459978 | 0.113410003 | 0.382459998 |
| 0.456959993 | 0.648930013 | 0.384200007 |
| 0.753859997 | 0.743439972 | 0.383839995 |
| 0.176090002 | 0.110930003 | 0.384180009 |
| 0.071439996 | 0.633970022 | 0.388280004 |
| 0.366569996 | 0.317970008 | 0.426200002 |
| 0.434340000 | 0.364349991 | 0.377330005 |
| 0.411940008 | 0.235159993 | 0.452719986 |
| 0.876389980 | 0.064390004 | 0.433349997 |
| 0.290699989 | 0.396450013 | 0.443549991 |
| 0.854709983 | 0.414119989 | 0.436150014 |
| 0.585600019 | 0.114399999 | 0.436830014 |
| 0.168870002 | 0.109099999 | 0.438369989 |
| 0.463250011 | 0.651170015 | 0.438369989 |
| 0.755670011 | 0.741620004 | 0.437909991 |
| 0.072999999 | 0.636820018 | 0.442240000 |
| 0.000000000 | 0.000000000 | 0.000000000 |
| 0.000000000 | 0.500000000 | 0.000000000 |
| 0.125000000 | 0.250000000 | 0.000000000 |
| 0.125000000 | 0.750000000 | 0.000000000 |
| 0.250000000 | 0.000000000 | 0.000000000 |
| 0.250000000 | 0.500000000 | 0.000000000 |
| 0.375000000 | 0.250000000 | 0.000000000 |
| 0.375000000 | 0.750000000 | 0.000000000 |
| 0.500000000 | 0.000000000 | 0.000000000 |

|             |             |             |
|-------------|-------------|-------------|
| 0.500000000 | 0.500000000 | 0.000000000 |
| 0.625000000 | 0.250000000 | 0.000000000 |
| 0.625000000 | 0.750000000 | 0.000000000 |
| 0.750000000 | 0.000000000 | 0.000000000 |
| 0.750000000 | 0.500000000 | 0.000000000 |
| 0.875000000 | 0.250000000 | 0.000000000 |
| 0.875000000 | 0.750000000 | 0.000000000 |
| 0.000000000 | 0.166669995 | 0.103940003 |
| 0.000000000 | 0.666670024 | 0.103940003 |
| 0.125000000 | 0.416669995 | 0.103940003 |
| 0.125000000 | 0.916670024 | 0.103940003 |
| 0.250000000 | 0.166669995 | 0.103940003 |
| 0.250000000 | 0.666670024 | 0.103940003 |
| 0.375000000 | 0.416669995 | 0.103940003 |
| 0.375000000 | 0.916670024 | 0.103940003 |
| 0.500000000 | 0.166669995 | 0.103940003 |
| 0.500000000 | 0.666670024 | 0.103940003 |
| 0.625000000 | 0.416669995 | 0.103940003 |
| 0.625000000 | 0.916670024 | 0.103940003 |
| 0.750000000 | 0.166669995 | 0.103940003 |
| 0.750000000 | 0.666670024 | 0.103940003 |
| 0.875000000 | 0.416669995 | 0.103940003 |
| 0.875000000 | 0.916670024 | 0.103940003 |
| 0.376410007 | 0.584460020 | 0.206550002 |
| 0.749970019 | 0.833060026 | 0.206369996 |
| 0.122010000 | 0.582970023 | 0.206469998 |
| 0.877189994 | 0.085890003 | 0.206980005 |
| 0.125640005 | 0.080590002 | 0.207379997 |
| 0.624909997 | 0.082989998 | 0.207010001 |
| 0.249950007 | 0.330330014 | 0.206410006 |
| 0.750299990 | 0.331169993 | 0.207729995 |
| 0.625769973 | 0.581939995 | 0.208930001 |
| 0.875549972 | 0.581149995 | 0.207980007 |
| 0.999620020 | 0.831889987 | 0.208810002 |
| 0.501489997 | 0.834219992 | 0.209330007 |
| 0.500370026 | 0.335480005 | 0.208330005 |
| 0.250809997 | 0.832690001 | 0.210099995 |
| 0.375310004 | 0.084009998 | 0.209889993 |
| 0.001240000 | 0.334179997 | 0.210419998 |
| 0.249390006 | 0.497709990 | 0.306320012 |
| 0.754379988 | 0.001970000 | 0.311650008 |

|             |             |             |
|-------------|-------------|-------------|
| 0.751230001 | 0.492579997 | 0.313970000 |
| 0.001070000 | 0.994799972 | 0.314550012 |
| 0.874090016 | 0.748769999 | 0.314249992 |
| 0.624549985 | 0.247630000 | 0.314359993 |
| 0.628889978 | 0.751590014 | 0.316260010 |
| 0.129549995 | 0.245230004 | 0.316020012 |
| 0.375479996 | 0.751810014 | 0.316179991 |
| 0.502449989 | 0.502099991 | 0.319169998 |
| 0.127710000 | 0.746460021 | 0.316870004 |
| 0.501119971 | 0.998170018 | 0.317570001 |
| 0.250779986 | 0.994109988 | 0.318069994 |
| 0.879450023 | 0.247659996 | 0.318740010 |
| 0.005210000 | 0.497689992 | 0.323009998 |
| 0.375200003 | 0.254009992 | 0.316219985 |

**TS5**

1.0

|               |              |               |
|---------------|--------------|---------------|
| 11.1216001511 | 0.0000000000 | 0.0000000000  |
| 0.0000000000  | 9.6316003799 | 0.0000000000  |
| 0.0000000000  | 0.0000000000 | 21.7964000702 |

| C | H | O | Pt |
|---|---|---|----|
| 8 | 3 | 8 | 64 |

Direct

|             |             |             |
|-------------|-------------|-------------|
| 0.863709986 | 0.072549999 | 0.382620007 |
| 0.817740023 | 0.395420015 | 0.387080014 |
| 0.444409996 | 0.629010022 | 0.384950012 |
| 0.546440005 | 0.131459996 | 0.384119987 |
| 0.140809998 | 0.995800018 | 0.387919992 |
| 0.751100004 | 0.742089987 | 0.384160012 |
| 0.057640001 | 0.639339983 | 0.385919988 |
| 0.315890014 | 0.324070007 | 0.466230005 |
| 0.100380003 | 0.339230001 | 0.373210013 |
| 0.408340007 | 0.367029995 | 0.471219987 |
| 0.300190002 | 0.217010006 | 0.483610004 |
| 0.852859974 | 0.067829996 | 0.436780006 |
| 0.820029974 | 0.402359992 | 0.441089988 |
| 0.235430002 | 0.392309994 | 0.442799985 |
| 0.446570009 | 0.628859997 | 0.439209998 |
| 0.542330027 | 0.138009995 | 0.438369989 |
| 0.145490006 | 0.996519983 | 0.442039996 |
| 0.752579987 | 0.739400029 | 0.438290000 |
| 0.054609999 | 0.644410014 | 0.439949989 |

|             |             |             |
|-------------|-------------|-------------|
| 0.00000000  | 0.00000000  | 0.00000000  |
| 0.00000000  | 0.50000000  | 0.00000000  |
| 0.12500000  | 0.25000000  | 0.00000000  |
| 0.12500000  | 0.75000000  | 0.00000000  |
| 0.25000000  | 0.00000000  | 0.00000000  |
| 0.25000000  | 0.50000000  | 0.00000000  |
| 0.37500000  | 0.25000000  | 0.00000000  |
| 0.37500000  | 0.75000000  | 0.00000000  |
| 0.50000000  | 0.00000000  | 0.00000000  |
| 0.50000000  | 0.50000000  | 0.00000000  |
| 0.62500000  | 0.25000000  | 0.00000000  |
| 0.62500000  | 0.75000000  | 0.00000000  |
| 0.75000000  | 0.00000000  | 0.00000000  |
| 0.75000000  | 0.50000000  | 0.00000000  |
| 0.87500000  | 0.25000000  | 0.00000000  |
| 0.87500000  | 0.75000000  | 0.00000000  |
| 0.00000000  | 0.166669995 | 0.103940003 |
| 0.00000000  | 0.666670024 | 0.103940003 |
| 0.12500000  | 0.416669995 | 0.103940003 |
| 0.12500000  | 0.916670024 | 0.103940003 |
| 0.25000000  | 0.166669995 | 0.103940003 |
| 0.25000000  | 0.666670024 | 0.103940003 |
| 0.37500000  | 0.416669995 | 0.103940003 |
| 0.37500000  | 0.916670024 | 0.103940003 |
| 0.50000000  | 0.166669995 | 0.103940003 |
| 0.50000000  | 0.666670024 | 0.103940003 |
| 0.62500000  | 0.416669995 | 0.103940003 |
| 0.62500000  | 0.916670024 | 0.103940003 |
| 0.75000000  | 0.166669995 | 0.103940003 |
| 0.75000000  | 0.666670024 | 0.103940003 |
| 0.87500000  | 0.416669995 | 0.103940003 |
| 0.87500000  | 0.916670024 | 0.103940003 |
| 0.248989999 | 0.330980003 | 0.204539999 |
| 0.751230001 | 0.834619999 | 0.206650004 |
| 0.377370000 | 0.584150016 | 0.206100002 |
| 0.501330018 | 0.335399985 | 0.207379997 |
| 0.373800009 | 0.077830002 | 0.207609996 |
| 0.878929973 | 0.086340003 | 0.209409997 |
| 0.625469983 | 0.082860000 | 0.207120001 |
| 0.124100000 | 0.082139999 | 0.208260000 |
| 0.123109996 | 0.583480000 | 0.206220001 |

|             |             |             |
|-------------|-------------|-------------|
| 0.627250016 | 0.583299994 | 0.209199995 |
| 0.749000013 | 0.330819994 | 0.208499998 |
| 0.874939978 | 0.582989991 | 0.208489999 |
| 0.999329984 | 0.835120022 | 0.209759995 |
| 0.502030015 | 0.833220005 | 0.209979996 |
| 0.249990001 | 0.830009997 | 0.209570006 |
| 0.996609986 | 0.336160004 | 0.209680006 |
| 0.371080011 | 0.250690013 | 0.308539987 |
| 0.253010005 | 0.497180015 | 0.307110012 |
| 0.753939986 | 0.002930000 | 0.311670005 |
| 0.745890021 | 0.493970007 | 0.315149993 |
| 0.004100000 | 0.004280000 | 0.323839992 |
| 0.497590005 | 0.499100000 | 0.317440003 |
| 0.873499990 | 0.750530005 | 0.315100014 |
| 0.126080006 | 0.255070001 | 0.311289996 |
| 0.627839983 | 0.753489971 | 0.316410005 |
| 0.617470026 | 0.248730004 | 0.316020012 |
| 0.498849988 | 0.998950005 | 0.317609996 |
| 0.377020001 | 0.749949992 | 0.317629993 |
| 0.251929998 | 0.999559999 | 0.316350013 |
| 0.128389999 | 0.747179985 | 0.315629989 |
| 0.873170018 | 0.252220005 | 0.322490007 |
| 0.004220000 | 0.503009975 | 0.319649994 |

**TS6**

1.0

|               |              |               |
|---------------|--------------|---------------|
| 11.1216001511 | 0.0000000000 | 0.0000000000  |
| 0.0000000000  | 9.6316003799 | 0.0000000000  |
| 0.0000000000  | 0.0000000000 | 21.7964000702 |

| C | H | O | Pt |
|---|---|---|----|
| 8 | 4 | 8 | 64 |

Direct

|             |             |             |
|-------------|-------------|-------------|
| 0.869099975 | 0.416819990 | 0.380789995 |
| 0.868669987 | 0.078840002 | 0.381520003 |
| 0.754960001 | 0.742169976 | 0.384550005 |
| 0.131430000 | 0.581260026 | 0.378190011 |
| 0.563369989 | 0.122740000 | 0.384460002 |
| 0.453280002 | 0.635420024 | 0.383459985 |
| 0.139239997 | 0.965879977 | 0.386669993 |
| 0.315369993 | 0.273710012 | 0.437480003 |
| 0.331849992 | 0.364850014 | 0.371490002 |
| 0.340640008 | 0.164430007 | 0.437150002 |

|             |             |             |
|-------------|-------------|-------------|
| 0.381770015 | 0.349000007 | 0.454430014 |
| 0.179089993 | 0.393629998 | 0.453969985 |
| 0.199839994 | 0.293460011 | 0.449479997 |
| 0.859080017 | 0.075280003 | 0.435829997 |
| 0.867129982 | 0.421429992 | 0.435400009 |
| 0.139139995 | 0.571630001 | 0.433360010 |
| 0.754790008 | 0.740249991 | 0.438679993 |
| 0.566219985 | 0.123089999 | 0.438859999 |
| 0.453119993 | 0.632539988 | 0.437860012 |
| 0.142959997 | 0.958679974 | 0.440780014 |
| 0.000000000 | 0.000000000 | 0.000000000 |
| 0.000000000 | 0.500000000 | 0.000000000 |
| 0.125000000 | 0.250000000 | 0.000000000 |
| 0.125000000 | 0.750000000 | 0.000000000 |
| 0.250000000 | 0.000000000 | 0.000000000 |
| 0.250000000 | 0.500000000 | 0.000000000 |
| 0.375000000 | 0.250000000 | 0.000000000 |
| 0.375000000 | 0.750000000 | 0.000000000 |
| 0.500000000 | 0.000000000 | 0.000000000 |
| 0.500000000 | 0.500000000 | 0.000000000 |
| 0.625000000 | 0.250000000 | 0.000000000 |
| 0.625000000 | 0.750000000 | 0.000000000 |
| 0.750000000 | 0.000000000 | 0.000000000 |
| 0.750000000 | 0.500000000 | 0.000000000 |
| 0.875000000 | 0.250000000 | 0.000000000 |
| 0.875000000 | 0.750000000 | 0.000000000 |
| 0.000000000 | 0.166669995 | 0.103940003 |
| 0.000000000 | 0.666670024 | 0.103940003 |
| 0.125000000 | 0.416669995 | 0.103940003 |
| 0.125000000 | 0.916670024 | 0.103940003 |
| 0.250000000 | 0.166669995 | 0.103940003 |
| 0.250000000 | 0.666670024 | 0.103940003 |
| 0.375000000 | 0.416669995 | 0.103940003 |
| 0.375000000 | 0.916670024 | 0.103940003 |
| 0.500000000 | 0.166669995 | 0.103940003 |
| 0.500000000 | 0.666670024 | 0.103940003 |
| 0.625000000 | 0.416669995 | 0.103940003 |
| 0.625000000 | 0.916670024 | 0.103940003 |
| 0.750000000 | 0.166669995 | 0.103940003 |
| 0.750000000 | 0.666670024 | 0.103940003 |
| 0.875000000 | 0.416669995 | 0.103940003 |



|             |             |             |
|-------------|-------------|-------------|
| 0.875000000 | 0.916670024 | 0.103940003 |
| 0.251069993 | 0.333090007 | 0.205850005 |
| 0.376379997 | 0.583480000 | 0.207240000 |
| 0.123190001 | 0.582069993 | 0.206980005 |
| 0.750859976 | 0.833559990 | 0.206780002 |
| 0.125200003 | 0.077699997 | 0.206640005 |
| 0.625060022 | 0.083200000 | 0.207289994 |
| 0.997009993 | 0.332920015 | 0.207169995 |
| 0.874800026 | 0.581600010 | 0.208079994 |
| 0.878470004 | 0.082730003 | 0.208289996 |
| 0.626760006 | 0.582650006 | 0.208260000 |
| 0.748399973 | 0.329979986 | 0.208489999 |
| 0.252299994 | 0.830359995 | 0.209010005 |
| 0.502430022 | 0.834270000 | 0.209450006 |
| 0.499630004 | 0.333970010 | 0.209360003 |
| 0.000049949 | 0.831179976 | 0.210160002 |
| 0.374330014 | 0.083540000 | 0.210370004 |
| 0.248009995 | 0.497810006 | 0.312189996 |
| 0.125110000 | 0.246570006 | 0.305770010 |
| 0.754239976 | 0.001710000 | 0.311969995 |
| 0.874800026 | 0.748730004 | 0.315420002 |
| 0.748260021 | 0.492320001 | 0.314859986 |
| 0.251850009 | 0.995959997 | 0.316570014 |
| 0.125729993 | 0.743809998 | 0.316419989 |
| 0.629429996 | 0.752200007 | 0.317070007 |
| 0.501039982 | 0.500670016 | 0.316249996 |
| 0.620239973 | 0.249369994 | 0.316890001 |
| 0.379200011 | 0.751789987 | 0.316599995 |
| 0.500840008 | 0.999170005 | 0.317770004 |
| 0.876100004 | 0.247040004 | 0.318820000 |
| 0.999710023 | 0.496969998 | 0.317869991 |
| 0.003620000 | 0.997500002 | 0.322539985 |
| 0.367670000 | 0.249039993 | 0.317660004 |

**TS7**

1.0

|               |              |               |
|---------------|--------------|---------------|
| 11.1216001511 | 0.0000000000 | 0.0000000000  |
| 0.0000000000  | 9.6316003799 | 0.0000000000  |
| 0.0000000000  | 0.0000000000 | 21.7964000702 |

| C | H | O | Pt |
|---|---|---|----|
| 8 | 3 | 8 | 64 |

Direct

|             |             |             |
|-------------|-------------|-------------|
| 0.875050008 | 0.078249998 | 0.381889999 |
| 0.858889997 | 0.411399990 | 0.382220000 |
| 0.454070002 | 0.661040008 | 0.385320008 |
| 0.588689983 | 0.101319999 | 0.381320000 |
| 0.142780006 | 0.979740024 | 0.387400001 |
| 0.754670024 | 0.743130028 | 0.384590000 |
| 0.077959999 | 0.625660002 | 0.387059987 |
| 0.374500006 | 0.294180006 | 0.408239990 |
| 0.224739999 | 0.392509997 | 0.411920011 |
| 0.456389993 | 0.403079987 | 0.390520006 |
| 0.433690012 | 0.234750003 | 0.438899994 |
| 0.866050005 | 0.074620001 | 0.436150014 |
| 0.853900015 | 0.413839996 | 0.436710000 |
| 0.281899989 | 0.344399989 | 0.439740002 |
| 0.457260013 | 0.667089999 | 0.439489990 |
| 0.598720014 | 0.099200003 | 0.435539991 |
| 0.144600004 | 0.974759996 | 0.441410005 |
| 0.756219983 | 0.741490006 | 0.438679993 |
| 0.087269999 | 0.625699997 | 0.441020012 |
| 0.000000000 | 0.000000000 | 0.000000000 |
| 0.000000000 | 0.500000000 | 0.000000000 |
| 0.125000000 | 0.250000000 | 0.000000000 |
| 0.125000000 | 0.750000000 | 0.000000000 |
| 0.250000000 | 0.000000000 | 0.000000000 |
| 0.250000000 | 0.500000000 | 0.000000000 |
| 0.375000000 | 0.250000000 | 0.000000000 |
| 0.375000000 | 0.750000000 | 0.000000000 |
| 0.500000000 | 0.000000000 | 0.000000000 |
| 0.500000000 | 0.500000000 | 0.000000000 |
| 0.625000000 | 0.250000000 | 0.000000000 |
| 0.625000000 | 0.750000000 | 0.000000000 |
| 0.750000000 | 0.000000000 | 0.000000000 |
| 0.750000000 | 0.500000000 | 0.000000000 |
| 0.875000000 | 0.250000000 | 0.000000000 |
| 0.875000000 | 0.750000000 | 0.000000000 |
| 0.000000000 | 0.166669995 | 0.103940003 |
| 0.000000000 | 0.666670024 | 0.103940003 |
| 0.125000000 | 0.416669995 | 0.103940003 |
| 0.125000000 | 0.916670024 | 0.103940003 |
| 0.250000000 | 0.166669995 | 0.103940003 |
| 0.250000000 | 0.666670024 | 0.103940003 |

|             |             |             |
|-------------|-------------|-------------|
| 0.375000000 | 0.416669995 | 0.103940003 |
| 0.375000000 | 0.916670024 | 0.103940003 |
| 0.500000000 | 0.166669995 | 0.103940003 |
| 0.500000000 | 0.666670024 | 0.103940003 |
| 0.625000000 | 0.416669995 | 0.103940003 |
| 0.625000000 | 0.916670024 | 0.103940003 |
| 0.750000000 | 0.166669995 | 0.103940003 |
| 0.750000000 | 0.666670024 | 0.103940003 |
| 0.875000000 | 0.416669995 | 0.103940003 |
| 0.875000000 | 0.916670024 | 0.103940003 |
| 0.251890004 | 0.329580009 | 0.205210000 |
| 0.749639988 | 0.832769990 | 0.206929997 |
| 0.378829986 | 0.581529975 | 0.206809998 |
| 0.499819994 | 0.332610011 | 0.209390000 |
| 0.374289989 | 0.080880001 | 0.209889993 |
| 0.878820002 | 0.083899997 | 0.208430007 |
| 0.625419974 | 0.082110003 | 0.206809998 |
| 0.125039995 | 0.078829996 | 0.206919998 |
| 0.120810002 | 0.582350016 | 0.205860004 |
| 0.624639988 | 0.579429984 | 0.210639998 |
| 0.749249995 | 0.330069989 | 0.208069995 |
| 0.873510003 | 0.582120001 | 0.208279997 |
| 0.998809993 | 0.832819998 | 0.209849998 |
| 0.502250016 | 0.832199991 | 0.208749995 |
| 0.250559986 | 0.829089999 | 0.209000006 |
| 0.997319996 | 0.335319996 | 0.208529994 |
| 0.368680000 | 0.247319996 | 0.318720013 |
| 0.248919994 | 0.496540010 | 0.304949999 |
| 0.756219983 | 0.001250000 | 0.312420011 |
| 0.748790026 | 0.490920007 | 0.314740002 |
| 0.006630000 | 0.998790026 | 0.322259992 |
| 0.499639988 | 0.496289998 | 0.325650007 |
| 0.873210013 | 0.749080002 | 0.314599991 |
| 0.127529994 | 0.250779986 | 0.307159990 |
| 0.628130019 | 0.749000013 | 0.317609996 |
| 0.622139990 | 0.245590001 | 0.314319998 |
| 0.501290023 | 0.996680021 | 0.315800011 |
| 0.375589997 | 0.749189973 | 0.314029992 |
| 0.253100008 | 0.997150004 | 0.316359997 |
| 0.126819998 | 0.742879987 | 0.315459996 |
| 0.879289985 | 0.247299999 | 0.319050014 |

|               |              |               |
|---------------|--------------|---------------|
| 0.002250000   | 0.497619987  | 0.322930008   |
| <b>TS8</b>    |              |               |
| 1.0           |              |               |
| 11.1216001511 | 0.0000000000 | 0.0000000000  |
| 0.0000000000  | 9.6316003799 | 0.0000000000  |
| 0.0000000000  | 0.0000000000 | 21.7964000702 |

|   |   |   |    |
|---|---|---|----|
| C | H | O | Pt |
| 8 | 3 | 8 | 64 |

Direct

|             |             |             |
|-------------|-------------|-------------|
| 0.861479998 | 0.082050003 | 0.381320000 |
| 0.860059977 | 0.415430009 | 0.380899996 |
| 0.492720008 | 0.662230015 | 0.377319992 |
| 0.516059995 | 0.156800002 | 0.378809988 |
| 0.136989996 | 0.987450004 | 0.387109995 |
| 0.763480008 | 0.751950026 | 0.386799991 |
| 0.074150003 | 0.629559994 | 0.387290001 |
| 0.278690010 | 0.357329994 | 0.383379996 |
| 0.419559985 | 0.491659999 | 0.449510008 |
| 0.438609987 | 0.327410012 | 0.455969989 |
| 0.213119999 | 0.323900014 | 0.417860001 |
| 0.853439987 | 0.078929998 | 0.435689986 |
| 0.852670014 | 0.419319987 | 0.435350001 |
| 0.377039999 | 0.401549995 | 0.455249995 |
| 0.485170007 | 0.650059998 | 0.432529986 |
| 0.521319985 | 0.162560001 | 0.434029996 |
| 0.140489995 | 0.987550020 | 0.441219985 |
| 0.769819975 | 0.750790000 | 0.440710008 |
| 0.077950001 | 0.632749975 | 0.441329986 |
| 0.000000000 | 0.000000000 | 0.000000000 |
| 0.000000000 | 0.500000000 | 0.000000000 |
| 0.125000000 | 0.250000000 | 0.000000000 |
| 0.125000000 | 0.750000000 | 0.000000000 |
| 0.250000000 | 0.000000000 | 0.000000000 |
| 0.250000000 | 0.500000000 | 0.000000000 |
| 0.375000000 | 0.250000000 | 0.000000000 |
| 0.375000000 | 0.750000000 | 0.000000000 |
| 0.500000000 | 0.000000000 | 0.000000000 |
| 0.500000000 | 0.500000000 | 0.000000000 |
| 0.625000000 | 0.250000000 | 0.000000000 |
| 0.625000000 | 0.750000000 | 0.000000000 |
| 0.750000000 | 0.000000000 | 0.000000000 |

|             |             |             |
|-------------|-------------|-------------|
| 0.750000000 | 0.500000000 | 0.000000000 |
| 0.875000000 | 0.250000000 | 0.000000000 |
| 0.875000000 | 0.750000000 | 0.000000000 |
| 0.000000000 | 0.166669995 | 0.103940003 |
| 0.000000000 | 0.666670024 | 0.103940003 |
| 0.125000000 | 0.416669995 | 0.103940003 |
| 0.125000000 | 0.916670024 | 0.103940003 |
| 0.250000000 | 0.166669995 | 0.103940003 |
| 0.250000000 | 0.666670024 | 0.103940003 |
| 0.375000000 | 0.416669995 | 0.103940003 |
| 0.375000000 | 0.916670024 | 0.103940003 |
| 0.500000000 | 0.166669995 | 0.103940003 |
| 0.500000000 | 0.666670024 | 0.103940003 |
| 0.625000000 | 0.416669995 | 0.103940003 |
| 0.625000000 | 0.916670024 | 0.103940003 |
| 0.750000000 | 0.166669995 | 0.103940003 |
| 0.750000000 | 0.666670024 | 0.103940003 |
| 0.875000000 | 0.416669995 | 0.103940003 |
| 0.875000000 | 0.916670024 | 0.103940003 |
| 0.252249986 | 0.332309991 | 0.206540003 |
| 0.748780012 | 0.833180010 | 0.207699999 |
| 0.374100000 | 0.583769977 | 0.207859993 |
| 0.498199999 | 0.333270013 | 0.208110005 |
| 0.373780012 | 0.083169997 | 0.209830001 |
| 0.878099978 | 0.083559997 | 0.208320007 |
| 0.624970019 | 0.082599998 | 0.207029998 |
| 0.124679998 | 0.078960001 | 0.206540003 |
| 0.126069993 | 0.579930007 | 0.209160000 |
| 0.626619995 | 0.584119976 | 0.207359999 |
| 0.749230027 | 0.330749989 | 0.207220003 |
| 0.876349986 | 0.583109975 | 0.207550004 |
| 0.999520004 | 0.831979990 | 0.209749997 |
| 0.501820028 | 0.833890021 | 0.209330007 |
| 0.250169992 | 0.830600023 | 0.209000006 |
| 0.997749984 | 0.335519999 | 0.208210006 |
| 0.370240003 | 0.247170001 | 0.323060006 |
| 0.252750009 | 0.495299995 | 0.318450004 |
| 0.751730025 | 0.004680000 | 0.311989993 |
| 0.750050008 | 0.494870007 | 0.312150002 |
| 0.002530000 | 0.001180000 | 0.322369993 |
| 0.503139973 | 0.503629982 | 0.312139988 |

|             |             |             |
|-------------|-------------|-------------|
| 0.872780025 | 0.752550006 | 0.313899994 |
| 0.124090001 | 0.249149993 | 0.305770010 |
| 0.627520025 | 0.754960001 | 0.322890013 |
| 0.620999992 | 0.252779990 | 0.313270003 |
| 0.499669999 | 0.000940000 | 0.316000015 |
| 0.376459986 | 0.752789974 | 0.315809995 |
| 0.250000000 | 0.996550024 | 0.316190004 |
| 0.127700001 | 0.744329989 | 0.315670013 |
| 0.875829995 | 0.249929994 | 0.318520010 |
| 0.001590000 | 0.500720024 | 0.321929991 |

**TS9**

1.0

|               |              |               |
|---------------|--------------|---------------|
| 11.1216001511 | 0.0000000000 | 0.0000000000  |
| 0.0000000000  | 9.6316003799 | 0.0000000000  |
| 0.0000000000  | 0.0000000000 | 21.7964000702 |

| C | H | O | Pt |
|---|---|---|----|
| 8 | 2 | 7 | 64 |

Direct

|             |             |             |
|-------------|-------------|-------------|
| 0.870150030 | 0.079630002 | 0.382050008 |
| 0.856589973 | 0.414180011 | 0.381859988 |
| 0.763180017 | 0.751309991 | 0.386610001 |
| 0.570129991 | 0.120010003 | 0.384640008 |
| 0.486299992 | 0.654919982 | 0.380039990 |
| 0.143649995 | 0.982129991 | 0.387109995 |
| 0.071690001 | 0.633329988 | 0.386629999 |
| 0.244829997 | 0.341019988 | 0.370770007 |
| 0.353689998 | 0.268689990 | 0.389750004 |
| 0.223700002 | 0.356530011 | 0.419640005 |
| 0.860430002 | 0.075960003 | 0.436329991 |
| 0.852750003 | 0.420639992 | 0.436239988 |
| 0.769640028 | 0.751259983 | 0.440519989 |
| 0.573090017 | 0.121480003 | 0.438800007 |
| 0.480479985 | 0.648479998 | 0.434549987 |
| 0.075999998 | 0.634419978 | 0.440660000 |
| 0.147670001 | 0.979130030 | 0.441170007 |
| 0.000000000 | 0.000000000 | 0.000000000 |
| 0.000000000 | 0.500000000 | 0.000000000 |
| 0.125000000 | 0.250000000 | 0.000000000 |
| 0.125000000 | 0.750000000 | 0.000000000 |
| 0.250000000 | 0.000000000 | 0.000000000 |
| 0.250000000 | 0.500000000 | 0.000000000 |

|             |             |             |
|-------------|-------------|-------------|
| 0.375000000 | 0.250000000 | 0.000000000 |
| 0.375000000 | 0.750000000 | 0.000000000 |
| 0.500000000 | 0.000000000 | 0.000000000 |
| 0.500000000 | 0.500000000 | 0.000000000 |
| 0.625000000 | 0.250000000 | 0.000000000 |
| 0.625000000 | 0.750000000 | 0.000000000 |
| 0.750000000 | 0.000000000 | 0.000000000 |
| 0.750000000 | 0.500000000 | 0.000000000 |
| 0.875000000 | 0.250000000 | 0.000000000 |
| 0.875000000 | 0.750000000 | 0.000000000 |
| 0.000000000 | 0.166669995 | 0.103940003 |
| 0.000000000 | 0.666670024 | 0.103940003 |
| 0.125000000 | 0.416669995 | 0.103940003 |
| 0.125000000 | 0.916670024 | 0.103940003 |
| 0.250000000 | 0.166669995 | 0.103940003 |
| 0.250000000 | 0.666670024 | 0.103940003 |
| 0.375000000 | 0.416669995 | 0.103940003 |
| 0.375000000 | 0.916670024 | 0.103940003 |
| 0.500000000 | 0.166669995 | 0.103940003 |
| 0.500000000 | 0.666670024 | 0.103940003 |
| 0.625000000 | 0.416669995 | 0.103940003 |
| 0.625000000 | 0.916670024 | 0.103940003 |
| 0.750000000 | 0.166669995 | 0.103940003 |
| 0.750000000 | 0.666670024 | 0.103940003 |
| 0.875000000 | 0.416669995 | 0.103940003 |
| 0.875000000 | 0.916670024 | 0.103940003 |
| 0.250340015 | 0.332659990 | 0.205219999 |
| 0.124569997 | 0.583109975 | 0.207560003 |
| 0.749689996 | 0.833000004 | 0.207450002 |
| 0.375959992 | 0.584089994 | 0.206980005 |
| 0.125049993 | 0.083039999 | 0.208130002 |
| 0.626609981 | 0.082390003 | 0.207220003 |
| 0.999400020 | 0.335299999 | 0.209749997 |
| 0.879410028 | 0.084880002 | 0.208759993 |
| 0.749870002 | 0.330269992 | 0.207530007 |
| 0.876299977 | 0.582769990 | 0.207460001 |
| 0.627099991 | 0.583299994 | 0.208000004 |
| 0.250589997 | 0.831900001 | 0.208550006 |
| 0.503069997 | 0.833890021 | 0.209399998 |
| 0.000030000 | 0.834469974 | 0.209629998 |
| 0.375600010 | 0.081969999 | 0.209570006 |

|             |             |             |
|-------------|-------------|-------------|
| 0.499949992 | 0.332470000 | 0.208729997 |
| 0.127880007 | 0.253609985 | 0.312629998 |
| 0.254299998 | 0.501510024 | 0.312290013 |
| 0.757080019 | 0.003110000 | 0.311940014 |
| 0.873459995 | 0.752499998 | 0.313630015 |
| 0.628549993 | 0.751489997 | 0.322840005 |
| 0.254750013 | 0.996410012 | 0.315719992 |
| 0.128889993 | 0.747340024 | 0.315439999 |
| 0.750249982 | 0.493129998 | 0.312620014 |
| 0.379550010 | 0.752370000 | 0.315149993 |
| 0.504700005 | 0.999689996 | 0.317389995 |
| 0.624800026 | 0.248720005 | 0.316489995 |
| 0.878989995 | 0.250519991 | 0.319940001 |
| 0.504180014 | 0.500670016 | 0.314139992 |
| 0.006850000 | 0.002170000 | 0.322990000 |
| 0.001460000 | 0.504469991 | 0.320879996 |
| 0.376819998 | 0.249829993 | 0.315409988 |

**TS10**

1.0

|               |              |               |
|---------------|--------------|---------------|
| 11.1216001511 | 0.0000000000 | 0.0000000000  |
| 0.0000000000  | 9.6316003799 | 0.0000000000  |
| 0.0000000000  | 0.0000000000 | 21.7964000702 |

| C | H | O | Pt |
|---|---|---|----|
| 8 | 3 | 7 | 64 |

Direct

|             |             |             |
|-------------|-------------|-------------|
| 0.442310005 | 0.625970006 | 0.385369986 |
| 0.850780010 | 0.409610003 | 0.382979989 |
| 0.876269996 | 0.077280000 | 0.381209999 |
| 0.575879991 | 0.110880002 | 0.384959996 |
| 0.753880024 | 0.744799972 | 0.383679986 |
| 0.086659998 | 0.604409993 | 0.388209999 |
| 0.139300004 | 0.924809992 | 0.380589992 |
| 0.234239995 | 0.257750005 | 0.390879989 |
| 0.383819997 | 0.272130013 | 0.394300014 |
| 0.230660006 | 0.166160002 | 0.420610011 |
| 0.226150006 | 0.354449987 | 0.417199999 |
| 0.438120008 | 0.625779986 | 0.439539999 |
| 0.850950003 | 0.416209996 | 0.437310010 |
| 0.868520021 | 0.071840003 | 0.435510010 |
| 0.583419979 | 0.109849997 | 0.439049989 |
| 0.754480004 | 0.744340003 | 0.437790006 |



|             |             |             |
|-------------|-------------|-------------|
| 0.101450004 | 0.592469990 | 0.441529989 |
| 0.146009997 | 0.934329987 | 0.435070008 |
| 0.000000000 | 0.000000000 | 0.000000000 |
| 0.000000000 | 0.500000000 | 0.000000000 |
| 0.125000000 | 0.250000000 | 0.000000000 |
| 0.125000000 | 0.750000000 | 0.000000000 |
| 0.250000000 | 0.000000000 | 0.000000000 |
| 0.250000000 | 0.500000000 | 0.000000000 |
| 0.375000000 | 0.250000000 | 0.000000000 |
| 0.375000000 | 0.750000000 | 0.000000000 |
| 0.500000000 | 0.000000000 | 0.000000000 |
| 0.500000000 | 0.500000000 | 0.000000000 |
| 0.625000000 | 0.250000000 | 0.000000000 |
| 0.625000000 | 0.750000000 | 0.000000000 |
| 0.750000000 | 0.000000000 | 0.000000000 |
| 0.750000000 | 0.500000000 | 0.000000000 |
| 0.875000000 | 0.250000000 | 0.000000000 |
| 0.875000000 | 0.750000000 | 0.000000000 |
| 0.000000000 | 0.166669995 | 0.103940003 |
| 0.000000000 | 0.666670024 | 0.103940003 |
| 0.125000000 | 0.416669995 | 0.103940003 |
| 0.125000000 | 0.916670024 | 0.103940003 |
| 0.250000000 | 0.166669995 | 0.103940003 |
| 0.250000000 | 0.666670024 | 0.103940003 |
| 0.375000000 | 0.416669995 | 0.103940003 |
| 0.375000000 | 0.916670024 | 0.103940003 |
| 0.500000000 | 0.166669995 | 0.103940003 |
| 0.500000000 | 0.666670024 | 0.103940003 |
| 0.625000000 | 0.416669995 | 0.103940003 |
| 0.625000000 | 0.916670024 | 0.103940003 |
| 0.750000000 | 0.166669995 | 0.103940003 |
| 0.750000000 | 0.666670024 | 0.103940003 |
| 0.875000000 | 0.416669995 | 0.103940003 |
| 0.875000000 | 0.916670024 | 0.103940003 |
| 0.250999987 | 0.331140012 | 0.206129998 |
| 0.125320002 | 0.081820004 | 0.207959995 |
| 0.625549972 | 0.083049998 | 0.207359999 |
| 0.626789987 | 0.580680013 | 0.208600000 |
| 0.378760010 | 0.584029973 | 0.205770001 |
| 0.751119971 | 0.834050000 | 0.206300005 |
| 0.875050008 | 0.581160009 | 0.208130002 |

|             |             |             |
|-------------|-------------|-------------|
| 0.749350011 | 0.329919994 | 0.207980007 |
| 0.498079985 | 0.331959993 | 0.211140007 |
| 0.000950000 | 0.334149987 | 0.210170001 |
| 0.878960013 | 0.085649997 | 0.208269998 |
| 0.121600002 | 0.585789979 | 0.206939995 |
| 0.250759989 | 0.829259992 | 0.207910001 |
| 0.375800014 | 0.082510002 | 0.209340006 |
| 0.502610028 | 0.833440006 | 0.209450006 |
| 0.000000000 | 0.832880020 | 0.209910005 |
| 0.128959998 | 0.252750009 | 0.314249992 |
| 0.755819976 | 0.003700000 | 0.312079996 |
| 0.500850022 | 0.500259995 | 0.318040013 |
| 0.748000026 | 0.492430001 | 0.314539999 |
| 0.873399973 | 0.750119984 | 0.313899994 |
| 0.620959997 | 0.247590005 | 0.317389995 |
| 0.380890012 | 0.748870015 | 0.316810012 |
| 0.127480000 | 0.747250021 | 0.322360009 |
| 0.250979990 | 0.503549993 | 0.304149985 |
| 0.255230010 | 0.992219985 | 0.311820000 |
| 0.502990007 | 0.997380018 | 0.317640007 |
| 0.372079998 | 0.255010009 | 0.321630001 |
| 0.879270017 | 0.250290006 | 0.319909990 |
| 0.003200000 | 0.500819981 | 0.320060015 |
| 0.629630029 | 0.751649976 | 0.315759987 |
| 0.004420000 | 0.001120000 | 0.319040000 |

### TS11

1.0

|               |              |               |
|---------------|--------------|---------------|
| 11.1216001511 | 0.0000000000 | 0.0000000000  |
| 0.0000000000  | 9.6316003799 | 0.0000000000  |
| 0.0000000000  | 0.0000000000 | 21.7964000702 |

| C | H | O | Pt |
|---|---|---|----|
| 8 | 4 | 7 | 64 |

Direct

|             |             |             |
|-------------|-------------|-------------|
| 0.439929992 | 0.622959971 | 0.385149986 |
| 0.869509995 | 0.071560003 | 0.381080002 |
| 0.137439996 | 0.926039994 | 0.380989999 |
| 0.818059981 | 0.392980009 | 0.386869997 |
| 0.539830029 | 0.136910006 | 0.383540004 |
| 0.752539992 | 0.741310000 | 0.383899987 |
| 0.064240001 | 0.615069985 | 0.386680007 |
| 0.150780007 | 0.263419986 | 0.420960009 |

|             |             |             |
|-------------|-------------|-------------|
| 0.242070004 | 0.241500005 | 0.371170014 |
| 0.160710007 | 0.372189999 | 0.434119999 |
| 0.217620000 | 0.198129997 | 0.444519997 |
| 0.061620001 | 0.221630007 | 0.431400001 |
| 0.436839998 | 0.621370018 | 0.439319998 |
| 0.863510013 | 0.065399997 | 0.435579985 |
| 0.141990006 | 0.932359993 | 0.435579985 |
| 0.821250021 | 0.400530010 | 0.440829992 |
| 0.533829987 | 0.145860001 | 0.437570006 |
| 0.755550027 | 0.739229977 | 0.437979996 |
| 0.065770000 | 0.608780026 | 0.440750003 |
| 0.000000000 | 0.000000000 | 0.000000000 |
| 0.000000000 | 0.500000000 | 0.000000000 |
| 0.125000000 | 0.250000000 | 0.000000000 |
| 0.125000000 | 0.750000000 | 0.000000000 |
| 0.250000000 | 0.000000000 | 0.000000000 |
| 0.250000000 | 0.500000000 | 0.000000000 |
| 0.375000000 | 0.250000000 | 0.000000000 |
| 0.375000000 | 0.750000000 | 0.000000000 |
| 0.500000000 | 0.000000000 | 0.000000000 |
| 0.500000000 | 0.500000000 | 0.000000000 |
| 0.625000000 | 0.250000000 | 0.000000000 |
| 0.625000000 | 0.750000000 | 0.000000000 |
| 0.750000000 | 0.000000000 | 0.000000000 |
| 0.750000000 | 0.500000000 | 0.000000000 |
| 0.875000000 | 0.250000000 | 0.000000000 |
| 0.875000000 | 0.750000000 | 0.000000000 |
| 0.000000000 | 0.166669995 | 0.103940003 |
| 0.000000000 | 0.666670024 | 0.103940003 |
| 0.125000000 | 0.416669995 | 0.103940003 |
| 0.125000000 | 0.916670024 | 0.103940003 |
| 0.250000000 | 0.166669995 | 0.103940003 |
| 0.250000000 | 0.666670024 | 0.103940003 |
| 0.375000000 | 0.416669995 | 0.103940003 |
| 0.375000000 | 0.916670024 | 0.103940003 |
| 0.500000000 | 0.166669995 | 0.103940003 |
| 0.500000000 | 0.666670024 | 0.103940003 |
| 0.625000000 | 0.416669995 | 0.103940003 |
| 0.625000000 | 0.916670024 | 0.103940003 |
| 0.750000000 | 0.166669995 | 0.103940003 |
| 0.750000000 | 0.666670024 | 0.103940003 |

|             |             |             |
|-------------|-------------|-------------|
| 0.875000000 | 0.416669995 | 0.103940003 |
| 0.875000000 | 0.916670024 | 0.103940003 |
| 0.378490001 | 0.584779978 | 0.205809996 |
| 0.249259993 | 0.331470013 | 0.205740005 |
| 0.500880003 | 0.334760010 | 0.207440004 |
| 0.625750005 | 0.083240002 | 0.207090005 |
| 0.751010001 | 0.834949970 | 0.206340000 |
| 0.374159992 | 0.079449996 | 0.207300007 |
| 0.875060022 | 0.581809998 | 0.207589999 |
| 0.123930000 | 0.585959971 | 0.206589997 |
| 0.750680029 | 0.330749989 | 0.208010003 |
| 0.879239976 | 0.086209998 | 0.208820000 |
| 0.627489984 | 0.582920015 | 0.209250003 |
| 0.250330001 | 0.829819977 | 0.209120005 |
| 0.125080004 | 0.082450002 | 0.208859995 |
| 0.000090000 | 0.833609998 | 0.209509999 |
| 0.502520025 | 0.833469987 | 0.209940001 |
| 0.001550000 | 0.332949996 | 0.212129995 |
| 0.253199995 | 0.500069976 | 0.305949986 |
| 0.373019993 | 0.249809995 | 0.310600013 |
| 0.753539979 | 0.004120000 | 0.311969995 |
| 0.872210026 | 0.750129998 | 0.313620001 |
| 0.747539997 | 0.493389994 | 0.315070003 |
| 0.254249990 | 0.995649993 | 0.314260006 |
| 0.380369991 | 0.748849988 | 0.317299992 |
| 0.498890013 | 0.498479992 | 0.317290008 |
| 0.618879974 | 0.249320000 | 0.315219998 |
| 0.500819981 | 0.998560011 | 0.317369998 |
| 0.128389999 | 0.748600006 | 0.321559995 |
| 0.875769973 | 0.252139986 | 0.322259992 |
| 0.004620000 | 0.503679991 | 0.315439999 |
| 0.002470000 | 0.001890000 | 0.318989992 |
| 0.628480017 | 0.753260016 | 0.316619992 |
| 0.127719998 | 0.255510002 | 0.319099993 |

**TS12**

1.0

|               |              |               |
|---------------|--------------|---------------|
| 11.1216001511 | 0.0000000000 | 0.0000000000  |
| 0.0000000000  | 9.6316003799 | 0.0000000000  |
| 0.0000000000  | 0.0000000000 | 21.7964000702 |

C H O Pt  
9 1 8 64

Direct

|             |             |             |
|-------------|-------------|-------------|
| 0.360080004 | 0.407860011 | 0.373030007 |
| 0.143450007 | 0.100079998 | 0.382160008 |
| 0.074740000 | 0.635789990 | 0.388020009 |
| 0.489630014 | 0.503139973 | 0.405660003 |
| 0.752780020 | 0.744390011 | 0.384240001 |
| 0.865970016 | 0.074850000 | 0.380510002 |
| 0.563639998 | 0.145820007 | 0.385960013 |
| 0.867100000 | 0.413239986 | 0.382250011 |
| 0.377220005 | 0.895240009 | 0.382099986 |
| 0.328150004 | 0.381469995 | 0.419440001 |
| 0.143179998 | 0.106840000 | 0.436610013 |
| 0.079530001 | 0.640320003 | 0.441969991 |
| 0.511240005 | 0.527999997 | 0.456970006 |
| 0.753099978 | 0.741590023 | 0.438340008 |
| 0.856850028 | 0.071640000 | 0.434810013 |
| 0.561619997 | 0.157000005 | 0.439850003 |
| 0.857190013 | 0.415199995 | 0.436580002 |
| 0.373039991 | 0.887139976 | 0.436459988 |
| 0.000000000 | 0.000000000 | 0.000000000 |
| 0.000000000 | 0.500000000 | 0.000000000 |
| 0.125000000 | 0.250000000 | 0.000000000 |
| 0.125000000 | 0.750000000 | 0.000000000 |
| 0.250000000 | 0.000000000 | 0.000000000 |
| 0.250000000 | 0.500000000 | 0.000000000 |
| 0.375000000 | 0.250000000 | 0.000000000 |
| 0.375000000 | 0.750000000 | 0.000000000 |
| 0.500000000 | 0.000000000 | 0.000000000 |
| 0.500000000 | 0.500000000 | 0.000000000 |
| 0.625000000 | 0.250000000 | 0.000000000 |
| 0.625000000 | 0.750000000 | 0.000000000 |
| 0.750000000 | 0.000000000 | 0.000000000 |
| 0.750000000 | 0.500000000 | 0.000000000 |
| 0.875000000 | 0.250000000 | 0.000000000 |
| 0.875000000 | 0.750000000 | 0.000000000 |
| 0.000000000 | 0.166669995 | 0.103940003 |
| 0.000000000 | 0.666670024 | 0.103940003 |
| 0.125000000 | 0.416669995 | 0.103940003 |
| 0.125000000 | 0.916670024 | 0.103940003 |
| 0.250000000 | 0.166669995 | 0.103940003 |
| 0.250000000 | 0.666670024 | 0.103940003 |

|             |             |             |
|-------------|-------------|-------------|
| 0.375000000 | 0.416669995 | 0.103940003 |
| 0.375000000 | 0.916670024 | 0.103940003 |
| 0.500000000 | 0.166669995 | 0.103940003 |
| 0.500000000 | 0.666670024 | 0.103940003 |
| 0.625000000 | 0.416669995 | 0.103940003 |
| 0.625000000 | 0.916670024 | 0.103940003 |
| 0.750000000 | 0.166669995 | 0.103940003 |
| 0.750000000 | 0.666670024 | 0.103940003 |
| 0.875000000 | 0.416669995 | 0.103940003 |
| 0.875000000 | 0.916670024 | 0.103940003 |
| 0.125850007 | 0.580200016 | 0.208210006 |
| 0.877730012 | 0.582080007 | 0.207499996 |
| 0.502799988 | 0.835619986 | 0.208890006 |
| 0.999989986 | 0.833180010 | 0.209859997 |
| 0.248699993 | 0.833440006 | 0.208100006 |
| 0.752099991 | 0.832949996 | 0.206290007 |
| 0.000980020 | 0.334580004 | 0.210229993 |
| 0.126269996 | 0.080459997 | 0.208379999 |
| 0.879109979 | 0.085680000 | 0.207179993 |
| 0.626020014 | 0.582109988 | 0.210189998 |
| 0.377719998 | 0.586000025 | 0.208059996 |
| 0.624010026 | 0.081019998 | 0.207479998 |
| 0.375759989 | 0.083839998 | 0.209199995 |
| 0.750220001 | 0.330540001 | 0.207770005 |
| 0.250209987 | 0.332139999 | 0.206320003 |
| 0.500930011 | 0.335559994 | 0.207230002 |
| 0.252270013 | 0.500760019 | 0.312240005 |
| 0.504199982 | 0.001150012 | 0.323559999 |
| 0.757380009 | 0.495119989 | 0.313360006 |
| 0.004090000 | 0.998499990 | 0.321689993 |
| 0.126350001 | 0.746029973 | 0.314949989 |
| 0.876389980 | 0.751900017 | 0.315800011 |
| 0.006360000 | 0.498169988 | 0.324140012 |
| 0.251720011 | 0.996550024 | 0.318910003 |
| 0.129179999 | 0.247070000 | 0.314040005 |
| 0.378639996 | 0.752569973 | 0.312429994 |
| 0.756550014 | 0.002610000 | 0.310050011 |
| 0.879140019 | 0.248809993 | 0.318679988 |
| 0.631519973 | 0.755050004 | 0.315809995 |
| 0.513639987 | 0.507439971 | 0.319260001 |
| 0.627099991 | 0.247659996 | 0.312779993 |

|               |              |               |
|---------------|--------------|---------------|
| 0.375999987   | 0.251260012  | 0.312240005   |
| <b>TS13</b>   |              |               |
| 1.0           |              |               |
| 11.1216001511 | 0.0000000000 | 0.0000000000  |
| 0.0000000000  | 9.6316003799 | 0.0000000000  |
| 0.0000000000  | 0.0000000000 | 21.7964000702 |

|   |   |   |    |
|---|---|---|----|
| C | H | O | Pt |
| 9 | 2 | 8 | 64 |

Direct

|             |             |             |
|-------------|-------------|-------------|
| 0.860960007 | 0.073579997 | 0.380679995 |
| 0.133910000 | 0.092340000 | 0.380109996 |
| 0.861549973 | 0.410250008 | 0.381390005 |
| 0.372429997 | 0.893060029 | 0.382710010 |
| 0.749260008 | 0.739929974 | 0.384099990 |
| 0.315109998 | 0.377059996 | 0.388130009 |
| 0.561039984 | 0.140279993 | 0.386519998 |
| 0.070060000 | 0.631330013 | 0.387639999 |
| 0.399619997 | 0.448020011 | 0.424919993 |
| 0.514549971 | 0.496069998 | 0.384889990 |
| 0.246439993 | 0.330100000 | 0.418119997 |
| 0.852930009 | 0.070900001 | 0.435000002 |
| 0.135450006 | 0.107699998 | 0.434379995 |
| 0.853299975 | 0.412910014 | 0.435770005 |
| 0.369289994 | 0.887489974 | 0.437189996 |
| 0.750549972 | 0.737389982 | 0.438210011 |
| 0.561720014 | 0.149389997 | 0.440499991 |
| 0.074290000 | 0.634400010 | 0.441650003 |
| 0.427210003 | 0.488660008 | 0.473930001 |
| 0.000000000 | 0.000000000 | 0.000000000 |
| 0.000000000 | 0.500000000 | 0.000000000 |
| 0.125000000 | 0.250000000 | 0.000000000 |
| 0.125000000 | 0.750000000 | 0.000000000 |
| 0.250000000 | 0.000000000 | 0.000000000 |
| 0.250000000 | 0.500000000 | 0.000000000 |
| 0.375000000 | 0.250000000 | 0.000000000 |
| 0.375000000 | 0.750000000 | 0.000000000 |
| 0.500000000 | 0.000000000 | 0.000000000 |
| 0.500000000 | 0.500000000 | 0.000000000 |
| 0.625000000 | 0.250000000 | 0.000000000 |
| 0.625000000 | 0.750000000 | 0.000000000 |
| 0.750000000 | 0.000000000 | 0.000000000 |

|             |             |             |
|-------------|-------------|-------------|
| 0.750000000 | 0.500000000 | 0.000000000 |
| 0.875000000 | 0.250000000 | 0.000000000 |
| 0.875000000 | 0.750000000 | 0.000000000 |
| 0.000000000 | 0.166669995 | 0.103940003 |
| 0.000000000 | 0.666670024 | 0.103940003 |
| 0.125000000 | 0.416669995 | 0.103940003 |
| 0.125000000 | 0.916670024 | 0.103940003 |
| 0.250000000 | 0.166669995 | 0.103940003 |
| 0.250000000 | 0.666670024 | 0.103940003 |
| 0.375000000 | 0.416669995 | 0.103940003 |
| 0.375000000 | 0.916670024 | 0.103940003 |
| 0.500000000 | 0.166669995 | 0.103940003 |
| 0.500000000 | 0.666670024 | 0.103940003 |
| 0.625000000 | 0.416669995 | 0.103940003 |
| 0.625000000 | 0.916670024 | 0.103940003 |
| 0.750000000 | 0.166669995 | 0.103940003 |
| 0.750000000 | 0.666670024 | 0.103940003 |
| 0.875000000 | 0.416669995 | 0.103940003 |
| 0.875000000 | 0.916670024 | 0.103940003 |
| 0.750320017 | 0.832830012 | 0.206410006 |
| 0.249640003 | 0.331609994 | 0.206660002 |
| 0.499300003 | 0.332309991 | 0.206890002 |
| 0.877189994 | 0.083679996 | 0.207330003 |
| 0.626339972 | 0.582669973 | 0.207359999 |
| 0.876569986 | 0.581480026 | 0.207499996 |
| 0.374720007 | 0.585810006 | 0.207920000 |
| 0.622550011 | 0.079949997 | 0.207810000 |
| 0.125220001 | 0.077590004 | 0.207310006 |
| 0.748440027 | 0.329250008 | 0.207729995 |
| 0.248190001 | 0.831870019 | 0.208859995 |
| 0.125499994 | 0.578599989 | 0.209150001 |
| 0.500490010 | 0.834739983 | 0.209670007 |
| 0.998369992 | 0.333460003 | 0.209350005 |
| 0.374280006 | 0.083300002 | 0.210370004 |
| 0.999019980 | 0.831579983 | 0.210130006 |
| 0.751999974 | 0.999949992 | 0.310710013 |
| 0.124119997 | 0.241960004 | 0.309720010 |
| 0.750699997 | 0.492680013 | 0.312999994 |
| 0.621699989 | 0.247180000 | 0.314310014 |
| 0.506009996 | 0.503069997 | 0.311230004 |
| 0.377020001 | 0.746280015 | 0.315070003 |



|             |             |             |
|-------------|-------------|-------------|
| 0.251239985 | 0.495409995 | 0.315290004 |
| 0.371549994 | 0.253349990 | 0.315780014 |
| 0.124169998 | 0.742609978 | 0.315600008 |
| 0.872590005 | 0.749249995 | 0.315369993 |
| 0.627240002 | 0.749239981 | 0.316020012 |
| 0.874379992 | 0.246040002 | 0.318150014 |
| 0.250099987 | 0.993640006 | 0.319160014 |
| 0.000710000 | 0.994939983 | 0.321920007 |
| 0.002000000 | 0.495590001 | 0.322950006 |
| 0.500970006 | 0.998769999 | 0.323419988 |

**TS14**

1.0

|               |              |               |
|---------------|--------------|---------------|
| 11.1216001511 | 0.0000000000 | 0.0000000000  |
| 0.0000000000  | 9.6316003799 | 0.0000000000  |
| 0.0000000000  | 0.0000000000 | 21.7964000702 |

| C | H | O | Pt |
|---|---|---|----|
| 9 | 3 | 8 | 64 |

Direct

|             |             |             |
|-------------|-------------|-------------|
| 0.874050021 | 0.064980000 | 0.379720002 |
| 0.177330002 | 0.115610003 | 0.390619993 |
| 0.810130000 | 0.385890007 | 0.387279987 |
| 0.379929990 | 0.889090002 | 0.383240014 |
| 0.734200001 | 0.740629971 | 0.386920005 |
| 0.558099985 | 0.141709998 | 0.386059999 |
| 0.274190009 | 0.510209978 | 0.407559991 |
| 0.009150000 | 0.661650002 | 0.378560007 |
| 0.386480004 | 0.498930007 | 0.434269994 |
| 0.202930003 | 0.374839991 | 0.373039991 |
| 0.198599994 | 0.541239977 | 0.436390013 |
| 0.394069999 | 0.506980002 | 0.484560013 |
| 0.872669995 | 0.053029999 | 0.434100002 |
| 0.173360005 | 0.112159997 | 0.444629997 |
| 0.807749987 | 0.393260002 | 0.441190004 |
| 0.377169997 | 0.880240023 | 0.437610000 |
| 0.733309984 | 0.739289999 | 0.440880001 |
| 0.556500018 | 0.153410003 | 0.439859986 |
| 0.489360005 | 0.479620010 | 0.407150000 |
| 0.014070000 | 0.656430006 | 0.433279991 |
| 0.000000000 | 0.000000000 | 0.000000000 |
| 0.000000000 | 0.500000000 | 0.000000000 |
| 0.125000000 | 0.250000000 | 0.000000000 |

|             |             |             |
|-------------|-------------|-------------|
| 0.125000000 | 0.750000000 | 0.000000000 |
| 0.250000000 | 0.000000000 | 0.000000000 |
| 0.250000000 | 0.500000000 | 0.000000000 |
| 0.375000000 | 0.250000000 | 0.000000000 |
| 0.375000000 | 0.750000000 | 0.000000000 |
| 0.500000000 | 0.000000000 | 0.000000000 |
| 0.500000000 | 0.500000000 | 0.000000000 |
| 0.625000000 | 0.250000000 | 0.000000000 |
| 0.625000000 | 0.750000000 | 0.000000000 |
| 0.750000000 | 0.000000000 | 0.000000000 |
| 0.750000000 | 0.500000000 | 0.000000000 |
| 0.875000000 | 0.250000000 | 0.000000000 |
| 0.875000000 | 0.750000000 | 0.000000000 |
| 0.000000000 | 0.166669995 | 0.103940003 |
| 0.000000000 | 0.666670024 | 0.103940003 |
| 0.125000000 | 0.416669995 | 0.103940003 |
| 0.125000000 | 0.916670024 | 0.103940003 |
| 0.250000000 | 0.166669995 | 0.103940003 |
| 0.250000000 | 0.666670024 | 0.103940003 |
| 0.375000000 | 0.416669995 | 0.103940003 |
| 0.375000000 | 0.916670024 | 0.103940003 |
| 0.500000000 | 0.166669995 | 0.103940003 |
| 0.500000000 | 0.666670024 | 0.103940003 |
| 0.625000000 | 0.416669995 | 0.103940003 |
| 0.625000000 | 0.916670024 | 0.103940003 |
| 0.750000000 | 0.166669995 | 0.103940003 |
| 0.750000000 | 0.666670024 | 0.103940003 |
| 0.875000000 | 0.416669995 | 0.103940003 |
| 0.875000000 | 0.916670024 | 0.103940003 |
| 0.625810027 | 0.581539989 | 0.209409997 |
| 0.501110017 | 0.333880007 | 0.205610007 |
| 0.751879990 | 0.831160009 | 0.207509995 |
| 0.374709994 | 0.586049974 | 0.207780004 |
| 0.246739998 | 0.334639996 | 0.207059994 |
| 0.875919998 | 0.085830003 | 0.207450002 |
| 0.623780012 | 0.078259997 | 0.207499996 |
| 0.125770003 | 0.083789997 | 0.208930001 |
| 0.749740005 | 0.328920007 | 0.207939997 |
| 0.874629974 | 0.580980003 | 0.207130000 |
| 0.246979997 | 0.835030019 | 0.208989993 |
| 0.125009999 | 0.583469987 | 0.207049996 |

|             |             |             |
|-------------|-------------|-------------|
| 0.501619995 | 0.832809985 | 0.209549993 |
| 0.374029994 | 0.077260002 | 0.207020000 |
| 0.000980000 | 0.331010014 | 0.211019993 |
| 0.997560024 | 0.833469987 | 0.208370000 |
| 0.501850009 | 0.498710006 | 0.313089997 |
| 0.752770007 | 0.998420000 | 0.311989993 |
| 0.129250005 | 0.251740009 | 0.324180007 |
| 0.748470008 | 0.490130007 | 0.314249992 |
| 0.621110022 | 0.243340001 | 0.312700003 |
| 0.375070006 | 0.249139994 | 0.304080009 |
| 0.625010014 | 0.747959971 | 0.315279990 |
| 0.373919994 | 0.749140024 | 0.313520014 |
| 0.122010000 | 0.750349998 | 0.313959986 |
| 0.870970011 | 0.745869994 | 0.320850015 |
| 0.253760010 | 0.502260029 | 0.315070003 |
| 0.876219988 | 0.249259993 | 0.323460013 |
| 0.246610001 | 0.997789979 | 0.322279990 |
| 0.500249982 | 0.997210026 | 0.323430002 |
| 0.998650014 | 0.000849962 | 0.313360006 |
| 0.002220000 | 0.498789996 | 0.313360006 |

**TS15**

1.0

|               |              |               |
|---------------|--------------|---------------|
| 11.1216001511 | 0.0000000000 | 0.0000000000  |
| 0.0000000000  | 9.6316003799 | 0.0000000000  |
| 0.0000000000  | 0.0000000000 | 21.7964000702 |

| C | H | O | Pt |
|---|---|---|----|
| 9 | 4 | 8 | 64 |

Direct

|             |             |             |
|-------------|-------------|-------------|
| 0.011900000 | 0.658760011 | 0.378630012 |
| 0.191949993 | 0.140919998 | 0.386220008 |
| 0.375539988 | 0.891889989 | 0.383630008 |
| 0.875779986 | 0.063380003 | 0.379759997 |
| 0.553049982 | 0.144319996 | 0.385829985 |
| 0.734820008 | 0.737529993 | 0.386949986 |
| 0.813750029 | 0.385089993 | 0.386999995 |
| 0.279069990 | 0.504260004 | 0.419030011 |
| 0.401580006 | 0.506550014 | 0.444409996 |
| 0.295899987 | 0.612200022 | 0.370970011 |
| 0.247600004 | 0.395310014 | 0.420069993 |
| 0.214680001 | 0.564719975 | 0.446429998 |
| 0.410030007 | 0.517409980 | 0.494850010 |

|             |             |             |
|-------------|-------------|-------------|
| 0.496399999 | 0.494929999 | 0.414900005 |
| 0.018800000 | 0.654760003 | 0.433450013 |
| 0.197870001 | 0.153300002 | 0.440250009 |
| 0.874589980 | 0.052400000 | 0.434210002 |
| 0.373210013 | 0.881179988 | 0.438160002 |
| 0.547649980 | 0.158950001 | 0.439579993 |
| 0.732900023 | 0.735170007 | 0.440970004 |
| 0.811890006 | 0.393519998 | 0.440939993 |
| 0.000000000 | 0.000000000 | 0.000000000 |
| 0.000000000 | 0.500000000 | 0.000000000 |
| 0.125000000 | 0.250000000 | 0.000000000 |
| 0.125000000 | 0.750000000 | 0.000000000 |
| 0.250000000 | 0.000000000 | 0.000000000 |
| 0.250000000 | 0.500000000 | 0.000000000 |
| 0.375000000 | 0.250000000 | 0.000000000 |
| 0.375000000 | 0.750000000 | 0.000000000 |
| 0.500000000 | 0.000000000 | 0.000000000 |
| 0.500000000 | 0.500000000 | 0.000000000 |
| 0.625000000 | 0.250000000 | 0.000000000 |
| 0.625000000 | 0.750000000 | 0.000000000 |
| 0.750000000 | 0.000000000 | 0.000000000 |
| 0.750000000 | 0.500000000 | 0.000000000 |
| 0.875000000 | 0.250000000 | 0.000000000 |
| 0.875000000 | 0.750000000 | 0.000000000 |
| 0.000000000 | 0.166669995 | 0.103940003 |
| 0.000000000 | 0.666670024 | 0.103940003 |
| 0.125000000 | 0.416669995 | 0.103940003 |
| 0.125000000 | 0.916670024 | 0.103940003 |
| 0.250000000 | 0.166669995 | 0.103940003 |
| 0.250000000 | 0.666670024 | 0.103940003 |
| 0.375000000 | 0.416669995 | 0.103940003 |
| 0.375000000 | 0.916670024 | 0.103940003 |
| 0.500000000 | 0.166669995 | 0.103940003 |
| 0.500000000 | 0.666670024 | 0.103940003 |
| 0.625000000 | 0.416669995 | 0.103940003 |
| 0.625000000 | 0.916670024 | 0.103940003 |
| 0.750000000 | 0.166669995 | 0.103940003 |
| 0.750000000 | 0.666670024 | 0.103940003 |
| 0.875000000 | 0.416669995 | 0.103940003 |
| 0.875000000 | 0.916670024 | 0.103940003 |
| 0.501030028 | 0.333260000 | 0.205550000 |

|             |             |             |
|-------------|-------------|-------------|
| 0.248270005 | 0.335970014 | 0.207159996 |
| 0.374579996 | 0.077569999 | 0.207200006 |
| 0.623730004 | 0.077459998 | 0.207749993 |
| 0.875069976 | 0.580690026 | 0.207440004 |
| 0.751999974 | 0.830739975 | 0.207709998 |
| 0.749379992 | 0.328130007 | 0.207929999 |
| 0.125860006 | 0.081340000 | 0.207870007 |
| 0.247580007 | 0.834439993 | 0.209330007 |
| 0.875440001 | 0.085000001 | 0.207629994 |
| 0.375180006 | 0.586260021 | 0.207530007 |
| 0.626869977 | 0.581260026 | 0.208680004 |
| 0.125300005 | 0.582799971 | 0.207629994 |
| 0.000060000 | 0.331470013 | 0.209910005 |
| 0.501550019 | 0.832509995 | 0.209900007 |
| 0.997250021 | 0.832069993 | 0.208110005 |
| 0.375400007 | 0.248420000 | 0.306129992 |
| 0.752219975 | 0.996850014 | 0.312610000 |
| 0.126259997 | 0.247840002 | 0.315459996 |
| 0.503430009 | 0.496879995 | 0.311729997 |
| 0.621179998 | 0.242730007 | 0.313030005 |
| 0.749490023 | 0.488770008 | 0.314300001 |
| 0.373950005 | 0.748269975 | 0.314709991 |
| 0.625440001 | 0.746379972 | 0.315270007 |
| 0.121239997 | 0.750159979 | 0.313490003 |
| 0.003720000 | 0.495880008 | 0.314619988 |
| 0.246910006 | 0.997690022 | 0.323220015 |
| 0.253340006 | 0.494540006 | 0.316100001 |
| 0.998120010 | 0.997529984 | 0.313479990 |
| 0.871619999 | 0.743690014 | 0.321460009 |
| 0.500810027 | 0.995329976 | 0.324119985 |
| 0.876240015 | 0.247089997 | 0.323060006 |

**TS16**

1.0

|               |              |               |
|---------------|--------------|---------------|
| 11.1216001511 | 0.0000000000 | 0.0000000000  |
| 0.0000000000  | 9.6316003799 | 0.0000000000  |
| 0.0000000000  | 0.0000000000 | 21.7964000702 |

| C | H | O | Pt |
|---|---|---|----|
| 9 | 5 | 8 | 64 |

Direct

|             |             |             |
|-------------|-------------|-------------|
| 0.876860023 | 0.064000003 | 0.379159987 |
| 0.749830008 | 0.734570026 | 0.383729994 |

|             |             |             |
|-------------|-------------|-------------|
| 0.372009993 | 0.890630007 | 0.383430004 |
| 0.063780002 | 0.627690017 | 0.384900004 |
| 0.559710026 | 0.135900006 | 0.385969996 |
| 0.832939982 | 0.389840007 | 0.387039989 |
| 0.193810001 | 0.142739996 | 0.386810005 |
| 0.468230009 | 0.534020007 | 0.457069993 |
| 0.351709992 | 0.470860004 | 0.468989998 |
| 0.587180018 | 0.486719996 | 0.384820014 |
| 0.345789999 | 0.377590001 | 0.440580010 |
| 0.281639993 | 0.546790004 | 0.457580000 |
| 0.339280009 | 0.436690003 | 0.516820014 |
| 0.481350005 | 0.646059990 | 0.463209987 |
| 0.547020018 | 0.459850013 | 0.431849986 |
| 0.874029994 | 0.054540001 | 0.433739990 |
| 0.750240028 | 0.732290030 | 0.438340008 |
| 0.373609990 | 0.882640004 | 0.437929988 |
| 0.064750001 | 0.626190007 | 0.439009994 |
| 0.558640003 | 0.143209994 | 0.440129995 |
| 0.838469982 | 0.397509992 | 0.441080004 |
| 0.197799996 | 0.153129995 | 0.440990001 |
| 0.000000000 | 0.000000000 | 0.000000000 |
| 0.000000000 | 0.500000000 | 0.000000000 |
| 0.125000000 | 0.250000000 | 0.000000000 |
| 0.125000000 | 0.750000000 | 0.000000000 |
| 0.250000000 | 0.000000000 | 0.000000000 |
| 0.250000000 | 0.500000000 | 0.000000000 |
| 0.375000000 | 0.250000000 | 0.000000000 |
| 0.375000000 | 0.750000000 | 0.000000000 |
| 0.500000000 | 0.000000000 | 0.000000000 |
| 0.500000000 | 0.500000000 | 0.000000000 |
| 0.625000000 | 0.250000000 | 0.000000000 |
| 0.625000000 | 0.750000000 | 0.000000000 |
| 0.750000000 | 0.000000000 | 0.000000000 |
| 0.750000000 | 0.500000000 | 0.000000000 |
| 0.875000000 | 0.250000000 | 0.000000000 |
| 0.875000000 | 0.750000000 | 0.000000000 |
| 0.000000000 | 0.166669995 | 0.103940003 |
| 0.000000000 | 0.666670024 | 0.103940003 |
| 0.125000000 | 0.416669995 | 0.103940003 |
| 0.125000000 | 0.916670024 | 0.103940003 |
| 0.250000000 | 0.166669995 | 0.103940003 |

|             |             |             |
|-------------|-------------|-------------|
| 0.250000000 | 0.666670024 | 0.103940003 |
| 0.375000000 | 0.416669995 | 0.103940003 |
| 0.375000000 | 0.916670024 | 0.103940003 |
| 0.500000000 | 0.166669995 | 0.103940003 |
| 0.500000000 | 0.666670024 | 0.103940003 |
| 0.625000000 | 0.416669995 | 0.103940003 |
| 0.625000000 | 0.916670024 | 0.103940003 |
| 0.750000000 | 0.166669995 | 0.103940003 |
| 0.750000000 | 0.666670024 | 0.103940003 |
| 0.875000000 | 0.416669995 | 0.103940003 |
| 0.875000000 | 0.916670024 | 0.103940003 |
| 0.249329999 | 0.331440002 | 0.205349997 |
| 0.124200001 | 0.583700001 | 0.206200004 |
| 0.501389980 | 0.329499990 | 0.204019994 |
| 0.751800001 | 0.833750010 | 0.206839994 |
| 0.375389993 | 0.588630021 | 0.205300003 |
| 0.876169980 | 0.580259979 | 0.208770007 |
| 0.374740005 | 0.077390000 | 0.207929999 |
| 0.876730025 | 0.086280003 | 0.207670003 |
| 0.624220014 | 0.079599999 | 0.208000004 |
| 0.750680029 | 0.329789996 | 0.208539993 |
| 0.126110002 | 0.080210000 | 0.208409995 |
| 0.999090016 | 0.831789970 | 0.209020004 |
| 0.631340027 | 0.583649993 | 0.206469998 |
| 0.248280004 | 0.835030019 | 0.210460007 |
| 0.502210021 | 0.833320022 | 0.210280001 |
| 0.001340000 | 0.332520008 | 0.210679993 |
| 0.375510007 | 0.252759993 | 0.307440013 |
| 0.257070005 | 0.497590005 | 0.308010012 |
| 0.752919972 | 0.999729991 | 0.312050015 |
| 0.000110030 | 0.996039987 | 0.313980013 |
| 0.620790005 | 0.244179994 | 0.314020008 |
| 0.502799988 | 0.496749997 | 0.304930001 |
| 0.748839974 | 0.489879996 | 0.317759991 |
| 0.377270013 | 0.742500007 | 0.316439986 |
| 0.626850009 | 0.745720029 | 0.316300005 |
| 0.873350024 | 0.746640027 | 0.316040009 |
| 0.126289994 | 0.746429980 | 0.316439986 |
| 0.007780000 | 0.498070002 | 0.317059994 |
| 0.129759997 | 0.249090001 | 0.315580010 |
| 0.879119992 | 0.247920007 | 0.321880013 |

|             |             |             |
|-------------|-------------|-------------|
| 0.501420021 | 0.994870007 | 0.322510004 |
| 0.248730004 | 0.996590018 | 0.324160010 |

**TS17**

1.0

|               |              |               |
|---------------|--------------|---------------|
| 11.1216001511 | 0.0000000000 | 0.0000000000  |
| 0.0000000000  | 9.6316003799 | 0.0000000000  |
| 0.0000000000  | 0.0000000000 | 21.7964000702 |

|   |   |   |    |
|---|---|---|----|
| C | H | O | Pt |
| 9 | 6 | 8 | 64 |

Direct

|             |             |             |
|-------------|-------------|-------------|
| 0.876919985 | 0.060649998 | 0.379500002 |
| 0.371190012 | 0.890630007 | 0.382959992 |
| 0.748420000 | 0.715319991 | 0.381220013 |
| 0.069190003 | 0.619979978 | 0.384799987 |
| 0.823700011 | 0.384759992 | 0.386990011 |
| 0.207069993 | 0.153840005 | 0.385670006 |
| 0.557420015 | 0.138640001 | 0.385910004 |
| 0.483119994 | 0.562640011 | 0.459490001 |
| 0.376320004 | 0.486099988 | 0.479589999 |
| 0.451350003 | 0.417860001 | 0.374179989 |
| 0.302819997 | 0.495900005 | 0.446249992 |
| 0.475309998 | 0.660300016 | 0.433950007 |
| 0.396030009 | 0.377009988 | 0.490189999 |
| 0.653150022 | 0.592100024 | 0.465530008 |
| 0.345079988 | 0.537880003 | 0.522159994 |
| 0.873790026 | 0.051309999 | 0.434049994 |
| 0.373439997 | 0.880219996 | 0.437759995 |
| 0.747009993 | 0.703459978 | 0.436470002 |
| 0.074390002 | 0.615409970 | 0.439060003 |
| 0.824800014 | 0.392639995 | 0.441159993 |
| 0.554059982 | 0.152349994 | 0.439850003 |
| 0.219040006 | 0.168310001 | 0.439319998 |
| 0.586790025 | 0.526130021 | 0.479649991 |
| 0.000000000 | 0.000000000 | 0.000000000 |
| 0.000000000 | 0.500000000 | 0.000000000 |
| 0.125000000 | 0.250000000 | 0.000000000 |
| 0.125000000 | 0.750000000 | 0.000000000 |
| 0.250000000 | 0.000000000 | 0.000000000 |
| 0.250000000 | 0.500000000 | 0.000000000 |
| 0.375000000 | 0.250000000 | 0.000000000 |
| 0.375000000 | 0.750000000 | 0.000000000 |



|             |             |             |
|-------------|-------------|-------------|
| 0.500000000 | 0.000000000 | 0.000000000 |
| 0.500000000 | 0.500000000 | 0.000000000 |
| 0.625000000 | 0.250000000 | 0.000000000 |
| 0.625000000 | 0.750000000 | 0.000000000 |
| 0.750000000 | 0.000000000 | 0.000000000 |
| 0.750000000 | 0.500000000 | 0.000000000 |
| 0.875000000 | 0.250000000 | 0.000000000 |
| 0.875000000 | 0.750000000 | 0.000000000 |
| 0.000000000 | 0.166669995 | 0.103940003 |
| 0.000000000 | 0.666670024 | 0.103940003 |
| 0.125000000 | 0.416669995 | 0.103940003 |
| 0.125000000 | 0.916670024 | 0.103940003 |
| 0.250000000 | 0.166669995 | 0.103940003 |
| 0.250000000 | 0.666670024 | 0.103940003 |
| 0.375000000 | 0.416669995 | 0.103940003 |
| 0.375000000 | 0.916670024 | 0.103940003 |
| 0.500000000 | 0.166669995 | 0.103940003 |
| 0.500000000 | 0.666670024 | 0.103940003 |
| 0.625000000 | 0.416669995 | 0.103940003 |
| 0.625000000 | 0.916670024 | 0.103940003 |
| 0.750000000 | 0.166669995 | 0.103940003 |
| 0.750000000 | 0.666670024 | 0.103940003 |
| 0.875000000 | 0.416669995 | 0.103940003 |
| 0.875000000 | 0.916670024 | 0.103940003 |
| 0.249139994 | 0.331339985 | 0.205430001 |
| 0.123829998 | 0.583180010 | 0.206129998 |
| 0.749989986 | 0.831619978 | 0.206609994 |
| 0.377139986 | 0.587109983 | 0.206520006 |
| 0.876330018 | 0.085029997 | 0.207570001 |
| 0.374630004 | 0.078709997 | 0.208210006 |
| 0.500630021 | 0.332029998 | 0.206239998 |
| 0.624029994 | 0.079140000 | 0.207859993 |
| 0.874379992 | 0.579729974 | 0.208039999 |
| 0.125740007 | 0.079429999 | 0.208580002 |
| 0.749610007 | 0.329299986 | 0.208480000 |
| 0.997990012 | 0.830730021 | 0.209260002 |
| 0.501680017 | 0.833530009 | 0.210079998 |
| 0.247909993 | 0.834280014 | 0.210170001 |
| 0.000410000 | 0.331609994 | 0.210590005 |
| 0.625970006 | 0.579879999 | 0.209840000 |
| 0.374370009 | 0.250539988 | 0.308970004 |

|             |             |             |
|-------------|-------------|-------------|
| 0.253980011 | 0.498600006 | 0.307790011 |
| 0.752579987 | 0.998000026 | 0.312130004 |
| 0.999979973 | 0.994979978 | 0.314280003 |
| 0.375640005 | 0.745209992 | 0.315169990 |
| 0.127470002 | 0.248380005 | 0.315439999 |
| 0.124820001 | 0.745959997 | 0.316960007 |
| 0.872669995 | 0.746439993 | 0.316289991 |
| 0.007160000 | 0.497029990 | 0.316359997 |
| 0.625150025 | 0.744669974 | 0.316089988 |
| 0.749350011 | 0.489329994 | 0.316749990 |
| 0.621980011 | 0.243530005 | 0.313690007 |
| 0.501839995 | 0.994549990 | 0.323500007 |
| 0.877960026 | 0.246610001 | 0.322380006 |
| 0.247889996 | 0.996339977 | 0.324339986 |
| 0.499220014 | 0.497429997 | 0.315169990 |
